# Supplementary material for: Global, regional, and national burden of particulate matter pollution (1990–2021) and projections to 2042: A comprehensive analysis for the Global Burden of Disease database
Source: Research Square preprint supplement (doi:10.21203/rs.3.rs-7087796/v1), 2025-08-13
Supplement: Supplementary file 1 [file 1b308a03a07672514c0c1a4a.xlsx]

## Sheet: Table S3
Table S3: PMP-attributable burdens globally and by super-region, 1990 and 2021
	Mortality (95% UI)				DALYs (95% UI)
	Rate (per 100 000), age standardized, 1990	Rate (per 100 000), age standardized, 2021	Number (in millions), all ages, 1990	Number (in millions), all ages, 2021	Rate (per 100 000), age standardized, 1990	Rate (per 100 000), age standardized, 2021	Number (in millions), all ages, 1990	Number (in millions), all ages, 2021
Global	182.73 (153.27–211.42)	96.69 (79.91–114.40)	7.25 (6.03–8.45)	7.83 (6.48–9.26)	5865.15 (4690.12–6998.30)	2984.47 (2489.63–3487.35)	289.35 (222.30–350.59)	231.51 (194.54–270.86)
Central Europe, Eastern Europe, and Central Asia	159.12 (109.31–214.68)	58.24 (43.55–76.27)	0.67 (0.46–0.90)	0.37 (0.28–0.49)	3729.12 (2665.94–4843.60)	1399.28 (1071.90–1795.09)	16.08 (11.49–20.98)	8.05 (6.14–10.36)
High-income	48.57 (31.11–69.04)	11.31 (7.75–15.16)	0.58 (0.37–0.83)	0.29 (0.19–0.39)	1041.91 (691.35–1442.74)	286.27 (201.50–381.66)	11.85 (7.77–16.55)	5.86 (4.05–7.89)
Latin America and Caribbean	107.89 (79.66–136.41)	38.78 (28.15–49.90)	0.24 (0.18–0.31)	0.23 (0.17–0.29)	3187.56 (2387.21–3982.11)	1084.10 (816.62–1366.42)	10.20 (7.44–12.89)	6.37 (4.78–8.07)
North Africa and Middle East	187.38 (154.50–220.36)	116.25 (95.01–136.53)	0.33 (0.27–0.40)	0.45 (0.37–0.54)	5333.31 (4339.59–6381.14)	2871.13 (2365.27–3385.30)	14.99 (11.29–19.03)	13.61 (11.12–15.98)
South Asia	262.18 (220.22–300.55)	193.96 (163.84–221.42)	1.75 (1.43–2.01)	2.53 (2.14–2.87)	8984.51 (7294.60–10413.94)	5480.42 (4694.75–6270.19)	92.55 (69.74–110.67)	80.56 (68.75–92.31)
Southeast Asia, East Asia, and Oceania	320.09 (275.97–362.71)	124.42 (98.63–154.83)	2.86 (2.47–3.27)	3.02 (2.40–3.78)	7653.86 (6444.80–8850.14)	2687.83 (2186.43–3280.35)	91.98 (73.26–108.21)	67.61 (54.81–83.84)
Sub-Saharan Africa	239.98 (179.20–289.16)	170.27 (136.87–204.29)	0.82 (0.55–1.04)	0.95 (0.74–1.16)	8606.75 (5926.31–10816.47)	5182.71 (4128.54–6309.84)	51.70 (32.86–69.02)	49.46 (37.70–62.14)
DALYs = disability-adjusted life-years. PMP = particulate matter pollution.
