# Supplementary material for: Global, regional, and national burden of particulate matter pollution (1990–2021) and projections to 2042: A comprehensive analysis for the Global Burden of Disease database
Source: Research Square preprint supplement (doi:10.21203/rs.3.rs-7087796/v1), 2025-08-13
Supplement: Supplementary file 2 [file 1f9612dc6dbdd874a736f732.xlsx]

## Sheet: Table S4
Table S4: Tempol trends of PMP-attributable burdens globally and by super-region, 1990–2021
	Year range	Mortality (95% CI)	Year range	DALYs (95% CI)
		APC/AAPC (%)		APC/AAPC (%)
Global	1990–1995	–0.85 (–1.56 to 0.42)	1990–1994	–0.45 (–0.98 to 0.68)
	1995–2004	–1.82* (–2.79 to –1.08)	1994–2004	–1.54* (–2.14 to –1.37)
	2004–2007	–3.27* (–3.74 to –1.05)	2004–2007	–3.55* (–3.91 to –1.01)
	2007–2015	–2.32* (–3.80 to –1.35)	2007–2016	–2.22* (–3.63 to –1.37)
	2015–2021	–3.28* (–4.05 to –2.39)	2016–2019	–4.23* (–5.01 to –2.00)
	1990–2021	–2.22* (–2.29 to –2.13)	2019–2021	–1.63* (–3.68 to –0.34)
			1990–2021	–2.07* (–2.17 to –1.99)
Central Europe, Eastern Europe, and Central Asia	1990–1994	4.15* (2.99 to 5.29)	1990–1994	3.53* (2.07 to 5.30)
	1994–2002	–2.72* (–3.12 to –2.23)	1994–2002	–2.40* (–2.89 to –1.82)
	2002–2021	–4.85* (–4.96 to –4.74)	2002–2021	–5.02* (–5.16 to –4.89)
	1990–2021	–3.18* (–3.27 to –3.09)	1990–2021	–3.28* (–3.38 to –3.15)
High-income	1990–1999	–3.16* (–3.56 to –2.72)	1990–1998	–3.16* (–3.34 to –2.92)
	1999–2003	–4.11* (–4.40 to –2.82)	1998–2003	–4.44* (–4.85 to –4.11)
	2003–2006	–5.26* (–5.76 to –4.14)	2003–2010	–6.37* (–6.64 to –6.17)
	2006–2010	–6.10* (–6.60 to –5.58)	2010–2015	–4.40* (–4.72 to –3.68)
	2010–2015	–3.68* (–3.90 to –3.04)	2015–2019	–5.53* (–6.23 to –5.14)
	2015–2019	–4.66* (–5.32 to –4.35)	2019–2021	–2.84* (–4.03 to –2.00)
	2019–2021	–2.04* (–3.12 to –1.33)	1990–2021	–4.59* (–4.64 to –4.54)
	1990–2021	–4.08* (–4.13 to –4.03)
Latin America and Caribbean	1990–1995	–2.93* (–3.30 to –2.14)	1990–1995	–2.41* (–2.89 to –1.61)
	1995–2012	–3.65* (–3.80 to –3.60)	1995–2008	–3.57* (–4.05 to –3.45)
	2012–2021	–3.21* (–3.37 to –2.93)	2008–2021	–3.19* (–3.31 to –2.90)
	1990–2021	–3.41* (–3.45 to –3.36)	1990–2021	–3.22* (–3.28 to –3.16)
North Africa and Middle East	1990–2015	–1.84* (–1.90 to –1.78)	1990–2006	–1.54* (–1.94 to –1.44)
	2015–2021	–3.00* (–3.67 to –2.57)	2006–2015	–1.11* (–1.35 to –0.18)
	1990–2021	–2.07* (–2.14 to –2.01)	2015–2021	–2.55* (–3.25 to –2.09)
			1990–2021	–1.61* (–1.69 to –1.56)
South Asia	1990–2011	–1.49* (–1.71 to –1.39)	1990–1997	–0.06 (–0.42 to 0.52)
	2011–2015	–0.22 (–1.19 to 0.71)	1997–2000	–3.21* (–3.88 to –1.70)
	2015–2021	–3.38* (–4.09 to –2.89)	2000–2008	–0.29 (–0.52 to 1.04)
	1990–2021	–1.69* (–1.78 to –1.63)	2008–2011	–2.20* (–3.10 to –1.13)
			2011–2014	3.10* (1.43 to 3.97)
			2014–2021	–3.05* (–3.49 to –2.72)
			1990–2021	–1.02* (–1.10 to –0.94)
Southeast Asia, East Asia, and Oceania	1990–2004	–2.28* (–2.45 to –2.11)	1990–2004	–1.52* (–1.73 to –1.31)
	2004–2021	–4.46* (–4.61 to –4.33)	2004–2021	–4.38* (–4.60 to –4.18)
	1990–2021	–3.48* (–3.55 to –3.42)	1990–2021	–3.10* (–3.20 to –3.02)
Sub-Saharan Africa	1990–2000	–0.78* (–0.84 to –0.73)	1990–2000	–0.20* (–0.25 to –0.15)
	2000–2010	–1.97* (–2.04 to –1.92)	2000–2008	–1.55* (–1.68 to –1.48)
	2010–2016	–1.39* (–1.48 to –1.25)	2008–2016	–1.16* (–1.24 to –1.00)
	2016–2021	–3.00* (–3.11 to –2.90)	2016–2021	–2.09* (–2.26 to –1.94)
	1990–2021	–1.64* (–1.66 to –1.63)	1990–2021	–1.10* (–1.12 to –1.09)
*Indicates significant difference (α=0.05). AAPC = average annual percentage change. APC = annual percentage change. CI­­­ = confidential interval. DALYs = disability-adjusted life-years. PMP = particulate matter pollution.
