# Supplementary material for: Global, regional, and national burden of particulate matter pollution (1990–2021) and projections to 2042: A comprehensive analysis for the Global Burden of Disease database
Source: Research Square preprint supplement (doi:10.21203/rs.3.rs-7087796/v1), 2025-08-13
Supplement: Supplementary file 3 [file 3507132d3ae9c879ef0804db.xlsx]

## Sheet: Table_S11
Table S11: Global PMP-attributable burdens (1990–2021) and projections (2022–2042) by ARIMA and BAPC model
		ARIMA						BAPC
Type	Year	Mortality, rate (per 100 000), age standardized			DALYs, rate (per 100 000), age standardized			Mortality, rate (per 100 000), age standardized			DALYs, rate (per 100 000), age standardized
		Value	95% lower	95% upper	Value	95% lower	95% upper	Mean	95% lower	95% upper	Mean	95% lower	95% upper
Actual	1990	182.73			5865.15			165.507	165.383	165.631	5516.85	5516.19	5517.51
Actual	1991	180.79			5804.46			163.602	163.48	163.723	5445.72	5445.07	5446.37
Actual	1992	179.96			5764.32			162.73	162.61	162.85	5399.74	5399.09	5400.38
Actual	1993	179.64			5731.28			162.387	162.269	162.506	5368.3	5367.67	5368.94
Actual	1994	178.58			5682.02			161.442	161.325	161.559	5324.68	5324.05	5325.31
Actual	1995	177.12			5618.48			160.066	159.952	160.181	5267.91	5267.29	5268.53
Actual	1996	173.79			5513.57			157.03	156.917	157.142	5171.23	5170.62	5171.84
Actual	1997	170.3			5403.78			153.841	153.73	153.951	5068.3	5067.7	5068.9
Actual	1998	167.67			5311.75			151.401	151.293	151.509	4981.86	4981.27	4982.45
Actual	1999	164.75			5218.08			148.76	148.654	148.865	4896.65	4896.07	4897.23
Actual	2000	162.64			5133.75			146.87	146.766	146.974	4823.28	4822.7	4823.85
Actual	2001	160.33			5037.2			144.764	144.662	144.866	4737.44	4736.87	4738
Actual	2002	157.68			4940.43			142.388	142.288	142.487	4650.18	4649.62	4650.73
Actual	2003	156.04			4856.44			140.767	140.669	140.865	4571.87	4571.33	4572.42
Actual	2004	152.74			4748.33			137.788	137.692	137.884	4472.28	4471.75	4472.81
Actual	2005	148.37			4622.69			133.944	133.851	134.038	4358.26	4357.73	4358.78
Actual	2006	141.55			4453.81			127.94	127.85	128.03	4204.06	4203.55	4204.56
Actual	2007	137.45			4321.79			124.19	124.102	124.277	4080.85	4080.35	4081.34
Actual	2008	134.5			4212.28			121.432	121.347	121.518	3973.88	3973.4	3974.37
Actual	2009	130.88			4095.8			118.049	117.966	118.132	3854.64	3854.17	3855.1
Actual	2010	128.3			4008.7			115.555	115.474	115.636	3757.81	3757.35	3758.27
Actual	2011	125.41			3925.1			112.94	112.861	113.019	3674.2	3673.75	3674.65
Actual	2012	122.13			3831.64			110.066	109.99	110.143	3592.03	3591.59	3592.47
Actual	2013	120.38			3756.15			108.16	108.084	108.235	3517.36	3516.93	3517.79
Actual	2014	118.22			3667.92			105.964	105.891	106.038	3431.26	3430.84	3431.69
Actual	2015	114.78			3572.46			103.052	102.981	103.123	3346.8	3346.39	3347.21
Actual	2016	111.37			3466.5			100.032	99.9622	100.101	3244.66	3244.26	3245.06
Actual	2017	107.22			3344.79			96.1781	96.1109	96.2453	3114.94	3114.55	3115.33
Actual	2018	103.33			3232.08			92.6222	92.5571	92.6873	2995.02	2994.64	2995.4
Actual	2019	99.66			3127.48			89.1612	89.0981	89.2243	2882.39	2882.02	2882.76
Actual	2020	94.2			2944.13			84.1619	84.1013	84.2225	2705.99	2705.64	2706.35
Actual	2021	96.69			2984.47			86.4048	86.3439	86.4657	2749.09	2748.74	2749.45
Forecast	2022	93.9125	90.6883	97.1367	2891.55	2813.01	2970.09	83.4462	80.8843	86.008	2781.71	2421.57	3141.84
Forecast	2023	91.1368	86.5771	95.6965	2798.62	2687.55	2909.7	82.2066	78.0424	86.3708	2813.39	2025.17	3601.62
Forecast	2024	88.3611	82.7766	93.9455	2705.7	2569.66	2841.74	80.9982	74.8096	87.1867	2848.84	1525.79	4171.88
Forecast	2025	85.5854	79.137	92.0337	2612.77	2455.69	2769.86	79.8283	71.3791	88.2775	2890.06	934.668	4845.45
Forecast	2026	82.8097	75.6002	90.0192	2519.85	2344.23	2695.47	78.6979	67.8283	89.5675	2932.31	254.354	5610.26
Forecast	2027	80.034	72.1364	87.9316	2426.92	2234.54	2619.31	77.5837	64.168	90.9993	2971.17	-512.221	6454.56
Forecast	2028	77.2583	68.7279	85.7887	2334	2126.2	2541.8	76.4949	60.4294	92.5603	3009.8	-1360.61	7380.22
Forecast	2029	74.4826	65.3633	83.602	2241.08	2018.93	2463.22	75.4377	56.6322	94.2431	3053.75	-2292.48	8399.99
Forecast	2030	71.7069	62.0344	81.3794	2148.15	1912.53	2383.77	74.418	52.7915	96.0445	3104.14	-3312.44	9520.71
Forecast	2031	68.9312	58.7355	79.127	2055.23	1806.86	2303.59	73.4361	48.9146	97.9576	3154.16	-4416.68	10725
Forecast	2032	66.1555	55.4621	76.8489	1962.3	1701.81	2222.79	72.4716	44.9937	99.9495	3199.84	-5598.76	11998.4
Forecast	2033	63.3798	52.211	74.5487	1869.38	1597.3	2141.45	71.5325	41.0441	102.021	3246.08	-6864	13356.2
Forecast	2034	60.6041	48.9792	72.2291	1776.45	1493.27	2059.63	70.6227	37.0748	104.171	3299.46	-8229.1	14828
Forecast	2035	57.8284	45.7647	69.8922	1683.53	1389.65	1977.4	69.7438	33.0912	106.396	3360.01	-9702.6	16422.6
Forecast	2036	55.0527	42.5656	67.5399	1590.6	1286.41	1894.79	68.8951	29.0956	108.695	3418.14	-11262.4	18098.6
Forecast	2037	52.277	39.3803	65.1737	1497.68	1183.51	1811.84	68.0601	25.083	111.037	3470.12	-12893.4	19833.7
Forecast	2038	49.5013	36.2077	62.795	1404.75	1080.92	1728.58	67.2461	21.0625	113.43	3523.39	-14619.1	21665.9
Forecast	2039	46.7257	33.0466	60.4047	1311.83	978.607	1645.04	66.4545	17.0382	115.871	3585.85	-16477.5	23649.2
Forecast	2040	43.95	29.8961	58.0038	1218.9	876.551	1561.25	65.6829	13.0118	118.354	3656.43	-18476.6	25789.5
Forecast	2041	41.1743	26.7553	55.5932	1125.98	774.733	1477.22	64.9295	8.98483	120.874	3722.39	-20558.9	28003.6
Forecast	2042	38.3986	23.6235	53.1736	1033.05	673.134	1392.97	64.1811	4.9566	123.406	3779.82	-22696.6	30256.3
ARIMA = autoregressive integrated moving average. BAPC = Bayesian age-period-cohort. DALYs = disability-adjusted life-years. PMP = particulate matter pollution.
