# Supplementary material for: Global, regional, and national burden of particulate matter pollution (1990–2021) and projections to 2042: A comprehensive analysis for the Global Burden of Disease database
Source: Research Square preprint supplement (doi:10.21203/rs.3.rs-7087796/v1), 2025-08-13
Supplement: Supplementary file 4 [file 4296d44902094aa665452cda.xlsx]

## Sheet: Table S6
Table S6: SDI (2021) and AAPC (1990–2021) in PMP-attributable burdens, by country and territory
	SDI	AAPC (%), rate, age standardized
		Mortality	DALYs
AFG	0.34	–1.25	–1.88
AGO	0.45	–2.27	–3.08
ALB	0.71	–3.79	–4.28
AND	0.87	–4.67	–4.44
ARE	0.85	–1.67	–1.71
ARG	0.72	–2.87	–3.06
ARM	0.7	–1.61	–2.05
ASM	0.72	0.31	0.33
ATG	0.75	–1.15	–1.02
AUS	0.84	–2.20	–1.77
AUT	0.85	–5.07	–4.83
AZE	0.69	–1.96	–2.70
BDI	0.29	–1.58	–1.99
BEL	0.85	–5.35	–4.86
BEN	0.37	–1.05	–1.51
BFA	0.29	–0.83	–1.48
BGD	0.49	–1.48	–2.49
BGR	0.77	–3.19	–3.03
BHR	0.75	–2.40	–2.60
BHS	0.81	–1.38	–1.31
BIH	0.72	–2.60	–2.89
BLR	0.78	–2.67	–2.88
BLZ	0.61	–1.42	–1.62
BMU	0.82	–4.60	–4.11
BOL	0.6	–3.62	–4.37
BRA	0.65	–4.24	–4.53
BRB	0.75	–1.33	–1.06
BRN	0.81	–2.28	–1.68
BTN	0.47	–2.91	–3.75
BWA	0.64	–3.45	–3.31
CAF	0.31	–0.61	–0.98
CAN	0.87	–5.71	–5.16
CHE	0.93	–6.15	–5.41
CHL	0.77	–4.18	–3.71
CHN	0.72	–3.50	–3.93
CIV	0.43	–0.83	–1.18
CMR	0.48	–0.58	–1.04
COD	0.38	–0.66	–1.21
COG	0.58	–1.69	–1.95
COK	0.78	–3.20	–3.00
COL	0.66	–4.57	–4.67
COM	0.48	–1.62	–2.06
CPV	0.53	–0.51	–1.18
CRI	0.7	–4.13	–3.59
CUB	0.67	–1.60	–1.42
CYP	0.84	–4.51	–4.12
CZE	0.83	–4.43	–4.51
DEU	0.9	–5.75	–5.12
DJI	0.49	–1.17	–1.65
DMA	0.75	–2.20	–1.60
DNK	0.9	–5.64	–5.57
DOM	0.62	–2.26	–2.29
DZA	0.66	–1.06	–1.31
ECU	0.66	–3.90	–4.01
EGY	0.61	–0.81	–1.45
ERI	0.4	–1.25	–1.81
ESP	0.77	–5.12	–4.45
EST	0.84	–8.29	–7.90
ETH	0.36	–2.53	–3.04
FIN	0.86	–7.32	–6.79
FJI	0.68	–1.84	–2.02
FRA	0.84	–4.95	–4.24
FSM	0.59	–2.05	–2.17
GAB	0.63	–1.02	–1.32
GBR	0.86	–5.55	–5.05
GEO	0.73	–2.76	–3.26
GHA	0.56	–1.06	–1.49
GIN	0.34	–0.58	–1.55
GMB	0.41	–0.20	–0.90
GNB	0.35	–0.76	–1.38
GNQ	0.66	–3.28	–3.94
GRC	0.79	–3.54	–3.06
GRD	0.67	–1.85	–1.99
GRL	0.83	–3.62	–3.55
GTM	0.54	–2.79	–3.06
GUM	0.8	–1.70	–0.39
GUY	0.65	–1.95	–2.00
HND	0.51	–0.06	–0.92
HRV	0.8	–4.07	–3.88
HTI	0.45	–1.02	–1.29
HUN	0.79	–3.96	–3.95
IDN	0.66	–1.89	–2.56
IND	0.58	–1.03	–1.69
IRL	0.87	–6.49	–6.15
IRN	0.7	–2.06	–2.61
IRQ	0.66	–0.53	–1.26
ISL	0.88	–5.67	–5.42
ISR	0.81	–4.23	–3.83
ITA	0.81	–4.37	–4.35
JAM	0.68	–1.89	–2.03
JOR	0.73	–1.96	–1.62
JPN	0.87	–3.03	–2.11
KAZ	0.73	–1.15	–1.80
KEN	0.52	–0.17	–0.84
KGZ	0.6	–1.71	–2.37
KHM	0.47	–1.37	–2.43
KIR	0.53	–1.31	–1.57
KNA	0.75	–3.37	–2.94
KOR	0.89	–3.42	–2.96
KWT	0.85	–1.60	–1.39
LAO	0.49	–2.08	–2.90
LBN	0.74	–2.12	–2.13
LBR	0.35	–1.01	–2.13
LBY	0.73	0.31	0.01
LCA	0.67	–3.22	–2.50
LKA	0.7	–3.30	–3.22
LSO	0.51	0.64	0.27
LTU	0.86	–4.91	–4.96
LUX	0.88	–6.32	–5.92
LVA	0.83	–5.07	–4.77
MAR	0.56	–1.36	–2.00
MCO	0.91	–1.82	–1.57
MDA	0.73	–4.82	–4.54
MDG	0.4	–0.60	–1.12
MDV	0.65	–7.08	–7.44
MEX	0.66	–2.86	–2.97
MHL	0.57	–0.88	–0.83
MKD	0.75	–1.72	–2.56
MLI	0.27	–0.92	–1.29
MLT	0.8	–4.40	–4.06
MMR	0.53	–1.86	–2.57
MNE	0.8	–0.93	–1.63
MNG	0.62	–2.96	–3.69
MNP	0.77	–0.22	–0.08
MOZ	0.33	–0.31	–1.09
MRT	0.5	–1.52	–1.99
MUS	0.72	–2.54	–2.07
MWI	0.38	–0.65	–1.47
MYS	0.74	–2.15	–2.08
NAM	0.62	–1.96	–2.20
NER	0.17	–1.18	–2.30
NGA	0.5	–1.44	–1.82
NIC	0.52	–2.13	–2.77
NIU	0.73	–3.94	–3.35
NLD	0.89	–5.05	–4.99
NOR	0.92	–6.84	–6.49
NPL	0.43	–1.20	–2.22
NRU	0.63	–0.11	–0.16
NZL	0.85	–2.66	–2.83
OMN	0.77	–1.70	–2.18
PAK	0.5	–0.44	–0.86
PAN	0.71	–4.35	–3.99
PER	0.66	–3.22	–4.28
PHL	0.65	–1.47	–1.58
PLW	0.75	–0.20	–0.26
PNG	0.42	–0.70	–0.89
POL	0.81	–4.37	–4.40
PRI	0.83	–2.51	–1.67
PRK	0.57	–0.77	–0.85
PRT	0.74	–6.06	–5.32
PRY	0.64	–3.03	–3.25
PSE	0.63	–1.51	–1.82
QAT	0.85	–3.24	–3.06
ROU	0.77	–4.13	–4.10
RUS	0.81	–4.05	–4.01
RWA	0.44	–2.38	–3.05
SAU	0.82	–0.80	–1.06
SDN	0.54	–1.89	–2.55
SEN	0.41	–0.71	–1.36
SGP	0.86	–5.27	–5.27
SLB	0.43	–0.64	–0.77
SLE	0.36	–0.83	–1.66
SLV	0.56	–2.94	–3.53
SMR	0.89	–5.13	–4.18
SOM	0.08	–0.98	–1.29
SRB	0.79	–3.11	–3.18
SSD	0.28	–0.31	–0.51
STP	0.51	–1.38	–2.12
SUR	0.63	–1.83	–1.73
SVK	0.81	–3.57	–3.89
SVN	0.84	–4.86	–4.64
SWE	0.89	–6.75	–6.29
SWZ	0.59	–1.29	–1.32
SYC	0.73	–1.57	–1.24
SYR	0.62	–0.51	–1.03
TCD	0.24	–0.21	–0.67
TGO	0.41	–0.50	–1.08
THA	0.68	–3.33	–3.33
TJK	0.54	–1.48	–2.01
TKL	0.69	–1.01	–0.47
TKM	0.68	–0.47	–0.93
TLS	0.44	–1.13	–2.12
TON	0.63	–1.65	–1.72
TTO	0.77	–1.88	–1.52
TUN	0.68	–1.44	–1.83
TUR	0.71	–2.02	–2.89
TUV	0.58	–4.90	–5.28
TWN	0.87	–3.44	–3.00
TZA	0.45	–0.95	–1.69
UGA	0.42	–1.12	–1.45
UKR	0.76	–2.68	–2.68
URY	0.72	–3.49	–3.47
USA	0.86	–4.96	–4.45
UZB	0.66	–0.75	–1.34
VCT	0.64	–2.05	–1.94
VEN	0.6	–1.68	–1.89
VIR	0.82	–2.32	–1.73
VNM	0.63	–2.19	–2.78
VUT	0.47	–0.69	–0.70
WSM	0.59	–1.14	–1.15
YEM	0.45	–1.56	–2.16
ZAF	0.68	–0.82	–1.61
ZMB	0.51	–0.67	–1.38
ZWE	0.47	0.61	0.59
AAPC = average annual percentage change. DALYs = disability-adjusted life-years. PMP = particulate matter pollution. SDI = socio-demographic index
