# Supplementary material for: Global, regional, and national burden of particulate matter pollution (1990–2021) and projections to 2042: A comprehensive analysis for the Global Burden of Disease database
Source: Research Square preprint supplement (doi:10.21203/rs.3.rs-7087796/v1), 2025-08-13
Supplement: Supplementary file 5 [file 8fec1288cc21f8dac54bd9ce.xlsx]

## Sheet: Table_S8
Table S8: SDI vs. PMP-attributable burdens, by country and territory, 1990 and 2021
	SDI	SDI group	Mortality, rate (per 100 000), age standardized					DALYs, rate (per 100 000), age standardized
			Value in 1990	Value in 2021	Frontier value	EF	Trend	Value in 2021	Value in 1990	Frontier value	EF	Trend
AFG	0.34	Low SDI	425.79	288.53	137.54	150.99	Decrease	7566.53	13517.3	4050.17	3516.36	Decrease
AGO	0.45	Low SDI	279.33	136.81	87.62	49.2	Decrease	3662.42	9611.48	2513.09	1149.32	Decrease
ALB	0.71	Low-middle SDI	213.18	65.81	13.11	52.69	Decrease	1277.5	4992.69	335.18	942.33	Decrease
AND	0.87	High SDI	32.62	7.42	2.43	4.99	Decrease	171.59	698.65	57.16	114.43	Decrease
ARE	0.85	High SDI	181.27	114.23	3.56	110.67	Decrease	2255.67	4233.3	82.14	2173.53	Decrease
ARG	0.72	High-middle SDI	71.04	27.34	13.09	14.26	Decrease	659.77	1754.46	315.44	344.33	Decrease
ARM	0.7	High SDI	161.24	98.04	13.1	84.94	Decrease	2137.51	4065.9	335.01	1802.5	Decrease
ASM	0.72	High-middle SDI	27.58	28.53	13.1	15.43	Increase	791.78	737.48	313.69	478.09	Increase
ATG	0.75	High-middle SDI	60.68	41.24	7.79	33.44	Decrease	1027.6	1445.49	188.93	838.67	Decrease
AUS	0.84	High SDI	16.58	8.32	4.19	4.13	Decrease	188.44	343.82	93.05	95.39	Decrease
AUT	0.85	High SDI	65.36	13.6	3.36	10.24	Decrease	292.95	1307.68	79.47	213.48	Decrease
AZE	0.69	Low SDI	180.65	100.43	13.08	87.35	Decrease	2427.19	5624.37	335.24	2091.95	Decrease
BDI	0.29	Low SDI	337.89	206.7	140.33	66.38	Decrease	5696.14	10593.4	4229.82	1466.32	Decrease
BEL	0.85	High SDI	66.03	12.04	3.36	8.68	Decrease	290.9	1343.32	79.12	211.77	Decrease
BEN	0.37	Low SDI	263.33	190.04	104.16	85.87	Decrease	5699.63	9115.56	3359.79	2339.84	Decrease
BFA	0.29	Low SDI	236.58	181.71	143.83	37.88	Decrease	5617.53	8938.27	4252.91	1364.62	Decrease
BGD	0.49	Low-middle SDI	314.69	190.91	70.79	120.11	Decrease	5114.68	11135.3	2059.14	3055.54	Decrease
BGR	0.77	High-middle SDI	215.36	76.82	7.04	69.78	Decrease	1624.43	4179.89	189.7	1434.73	Decrease
BHR	0.75	High-middle SDI	317.81	150.65	7.63	143.02	Decrease	2938.15	6495.56	189.03	2749.12	Decrease
BHS	0.81	High-middle SDI	55.09	35.36	6.56	28.8	Decrease	984.84	1529.39	157.78	827.06	Decrease
BIH	0.72	High-middle SDI	210.29	90.99	13.09	77.91	Decrease	1941.11	4837.92	313.7	1627.41	Decrease
BLR	0.78	High-middle SDI	155.36	68.78	6.83	61.95	Decrease	1389.7	3305.19	184.34	1205.36	Decrease
BLZ	0.61	Low-middle SDI	90.8	57.91	21.56	36.35	Decrease	1570.01	2653.29	569.65	1000.36	Decrease
BMU	0.82	High SDI	29.58	6.88	6.11	0.77	Decrease	174.99	641.7	136.93	38.06	Decrease
BOL	0.6	Low-middle SDI	230.38	76.15	22.28	53.87	Decrease	1896.38	7320.25	585.12	1311.26	Decrease
BRA	0.65	High-middle SDI	101.52	26.45	15.89	10.55	Decrease	707.86	2950.31	421.33	286.53	Decrease
BRB	0.75	High-middle SDI	69.55	46.84	7.79	39.05	Decrease	1181.85	1650.46	191.46	990.38	Decrease
BRN	0.81	High-middle SDI	30.45	15.72	6.55	9.17	Decrease	409.47	685.45	155.6	253.87	Decrease
BTN	0.47	Low-middle SDI	234.44	102.98	76.35	26.63	Decrease	2652.36	8136.6	2264	388.35	Decrease
BWA	0.64	High-middle SDI	221.91	76.57	16.19	60.38	Decrease	2247	6246.96	428.78	1818.22	Decrease
CAF	0.31	Low SDI	385.47	317.43	138.32	179.11	Decrease	9427.06	12821.8	4068.42	5358.64	Decrease
CAN	0.87	High SDI	26.14	4.16	2.41	1.75	Decrease	109.56	544.5	56.67	52.89	Decrease
CHE	0.93	High SDI	49	7.05	2.26	4.79	Decrease	182.67	980.73	54.2	128.47	Decrease
CHL	0.77	High-middle SDI	103.82	26.84	7.04	19.8	Decrease	678.31	2282.39	190.26	488.04	Decrease
CHN	0.72	High-middle SDI	367.58	125.13	13.1	112.03	Decrease	2436.88	8142.7	325.68	2111.2	Decrease
CIV	0.43	Low SDI	253.52	195.54	91.77	103.77	Decrease	5807.76	8419.04	2716.66	3091.1	Decrease
CMR	0.48	Low-middle SDI	222.48	186.62	75.36	111.26	Decrease	5199.13	7168.01	2236.21	2962.92	Decrease
COD	0.38	Low SDI	277.5	227.51	103.26	124.25	Decrease	5841.77	8460.85	3311.76	2530.01	Decrease
COG	0.58	Low-middle SDI	310.02	183.1	23.17	159.93	Decrease	4540.89	8361.19	610.68	3930.21	Decrease
COK	0.78	High-middle SDI	40.48	14.74	6.84	7.91	Decrease	423.94	1093.27	189.4	234.55	Decrease
COL	0.66	Low-middle SDI	102.17	25.68	15.57	10.11	Decrease	663.35	2787.69	411.86	251.5	Decrease
COM	0.48	Low-middle SDI	251.5	152.95	75.25	77.71	Decrease	4678.5	8874.52	2264.21	2414.29	Decrease
CPV	0.53	Low-middle SDI	141.8	117.76	28.91	88.85	Decrease	2732.83	4152.15	786.15	1946.69	Decrease
CRI	0.7	Low SDI	65.4	18.12	13.1	5.03	Decrease	524.32	1603.83	334.91	189.41	Decrease
CUB	0.67	Low-middle SDI	77.92	46.15	13.8	32.35	Decrease	1043.15	1695.66	359.36	683.8	Decrease
CYP	0.84	High SDI	111.4	29.19	5.47	23.72	Decrease	535.8	1823.59	119.36	416.44	Decrease
CZE	0.83	High SDI	129.69	31.27	5.87	25.4	Decrease	657.95	2766.05	130.74	527.21	Decrease
DEU	0.9	High SDI	71.8	12.87	2.29	10.58	Decrease	295.59	1433.56	53.54	242.05	Decrease
DJI	0.49	Low-middle SDI	172.71	122.58	73.1	49.48	Decrease	3261.49	5388.3	2153.16	1108.33	Decrease
DMA	0.75	High-middle SDI	125.45	62.37	7.81	54.56	Decrease	1692.45	2822.54	191.01	1501.44	Decrease
DNK	0.9	High SDI	65.65	11.54	2.28	9.26	Decrease	245.15	1326.47	54.66	190.49	Decrease
DOM	0.62	Middle SDI	113.42	54.77	19.37	35.4	Decrease	1619.21	3367.06	506.59	1112.62	Decrease
DZA	0.66	Middle SDI	119.66	84.38	15.09	69.29	Decrease	1740.92	2706.06	389.5	1351.42	Decrease
ECU	0.66	High SDI	112.6	35.43	15.06	20.37	Decrease	888.69	3018.73	386.53	502.15	Decrease
EGY	0.61	Low-middle SDI	316.48	251.77	21.52	230.25	Decrease	5287.62	8020.61	572.62	4715	Decrease
ERI	0.4	Low SDI	311.97	212.33	96.64	115.69	Decrease	5753.23	10054.8	2994.49	2758.74	Decrease
ESP	0.77	High-middle SDI	42.53	8.17	7.04	1.13	Decrease	213.19	889.61	190.69	22.5	Decrease
EST	0.84	High SDI	97.36	7.26	3.83	3.43	Decrease	166.3	1983.32	86.33	79.98	Decrease
ETH	0.36	Low SDI	307.88	139.8	108.91	30.89	Decrease	4466.33	11536.5	3506.19	960.14	Decrease
FIN	0.86	High SDI	25.95	2.88	2.4	0.49	Decrease	69.37	547.04	58.23	11.13	Decrease
FJI	0.68	Low-middle SDI	231.27	128.92	13.53	115.39	Decrease	3247.26	5966.24	347.98	2899.28	Decrease
FRA	0.84	High SDI	35.97	7.67	4.84	2.82	Decrease	187.05	716.73	104.99	82.06	Decrease
FSM	0.59	Low-middle SDI	335.14	178.41	22.96	155.45	Decrease	4509.39	8809.91	602.26	3907.13	Decrease
GAB	0.63	Low-middle SDI	145.17	104.18	17.38	86.8	Decrease	2651.77	4077.62	447.69	2204.08	Decrease
GBR	0.86	High SDI	65.3	11.3	2.61	8.69	Decrease	278.5	1349.67	60.13	218.37	Decrease
GEO	0.73	High-middle SDI	152.61	69.09	10.59	58.5	Decrease	1616.16	3910.46	247.11	1369.05	Decrease
GHA	0.56	Low-middle SDI	258.5	187.21	25.64	161.57	Decrease	5018.88	7967.95	675.39	4343.5	Decrease
GIN	0.34	Low SDI	276.75	229.76	137.5	92.25	Decrease	6777.68	11020.5	4051.03	2726.66	Decrease
GMB	0.41	Low SDI	264.18	246.02	95.38	150.64	Decrease	6494.15	8630.56	2951.64	3542.51	Decrease
GNB	0.35	Low SDI	374.49	296.04	112.67	183.37	Decrease	8039.92	12501.6	3625.48	4414.44	Decrease
GNQ	0.66	Low-middle SDI	324	112.91	15.54	97.37	Decrease	2912.21	10284.8	412.57	2499.65	Decrease
GRC	0.79	High-middle SDI	76.61	25.42	6.61	18.81	Decrease	579.31	1509.02	160.45	418.86	Decrease
GRD	0.67	High-middle SDI	124.8	67.84	13.93	53.91	Decrease	1718.42	3231.16	353.47	1364.95	Decrease
GRL	0.83	High SDI	29.47	9.18	6	3.18	Decrease	225.19	710.44	134.39	90.79	Decrease
GTM	0.54	Low-middle SDI	209.97	88.24	28.68	59.56	Decrease	2377.93	6242.9	754.36	1623.57	Decrease
GUM	0.8	High-middle SDI	30.05	18.8	6.57	12.23	Decrease	649.22	706.38	157.83	491.39	Decrease
GUY	0.65	Low-middle SDI	178.78	96.87	15.87	81	Decrease	2722.75	5054.35	421.78	2300.98	Decrease
HND	0.51	Low-middle SDI	151.01	148.39	64.9	83.49	Decrease	3252.03	4311.16	1751.92	1500.11	Decrease
HRV	0.8	High-middle SDI	129.78	38.99	6.62	32.37	Decrease	789.8	2562.92	158.55	631.25	Decrease
HTI	0.45	Low SDI	373.01	269.25	87.73	181.52	Decrease	7241.07	10946.6	2506.95	4734.12	Decrease
HUN	0.79	High-middle SDI	137.87	40.97	6.82	34.15	Decrease	917.27	3156.98	164.81	752.47	Decrease
IDN	0.66	High SDI	203.82	115.69	15.59	100.11	Decrease	2830.28	6156.45	412.01	2418.27	Decrease
IND	0.58	Low-middle SDI	257.67	191.35	24.12	167.23	Decrease	5349.47	8748.77	629.42	4720.05	Decrease
IRL	0.87	High SDI	57.93	7.12	2.39	4.73	Decrease	154.89	1135.22	59.99	94.9	Decrease
IRN	0.7	Low-middle SDI	139.2	74.16	13.1	61.06	Decrease	1612.37	3663.56	334.84	1277.52	Decrease
IRQ	0.66	High SDI	184.23	151.39	15.06	136.33	Decrease	3509.68	5279.32	389.63	3120.05	Decrease
ISL	0.88	High SDI	15.53	2.86	2.24	0.62	Decrease	65.56	318.67	54.57	10.99	Decrease
ISR	0.81	High-middle SDI	70.4	19.3	6.55	12.74	Decrease	438.99	1448.91	155.59	283.4	Decrease
ITA	0.81	High-middle SDI	64.1	15.73	6.57	9.17	Decrease	334.7	1331.71	157.75	176.96	Decrease
JAM	0.68	High-middle SDI	93.56	45.06	13.09	31.97	Decrease	1224.86	2551.36	336.23	888.64	Decrease
JOR	0.73	High-middle SDI	99.33	61.66	13.1	48.55	Decrease	1586.54	2578.72	314.94	1271.6	Decrease
JPN	0.87	High SDI	25.27	9.91	2.34	7.56	Decrease	268.15	513.07	59.8	208.35	Decrease
KAZ	0.73	High-middle SDI	129.37	91.16	13.11	78.05	Decrease	1862.89	3288.15	315.19	1547.7	Decrease
KEN	0.52	Low-middle SDI	153.69	146.26	38.57	107.69	Decrease	3862.44	5033.86	1114.6	2747.84	Decrease
KGZ	0.6	Low-middle SDI	234.35	135.59	22.21	113.38	Decrease	3016.51	6329.06	586.51	2430	Decrease
KHM	0.47	Low-middle SDI	337.67	217.45	76.23	141.22	Decrease	5364.64	11656.9	2266.83	3097.81	Decrease
KIR	0.53	Low-middle SDI	325.78	219.05	31.44	187.61	Decrease	5832.43	9401.9	880.68	4951.75	Decrease
KNA	0.75	High-middle SDI	55.26	17.5	7.68	9.83	Decrease	459.92	1328.47	189.9	270.03	Decrease
KOR	0.89	High SDI	82.55	28.13	2.25	25.89	Decrease	681.66	1753.87	54.38	627.28	Decrease
KWT	0.85	High SDI	115.47	70.95	3.75	67.2	Decrease	1851.82	2907.38	87.6	1764.22	Decrease
LAO	0.49	Low-middle SDI	437.42	228.68	71.11	157.57	Decrease	5834.81	14553.6	2129.23	3705.58	Decrease
LBN	0.74	High-middle SDI	81.82	43.91	7.91	36	Decrease	1102.44	2087.4	190.72	911.72	Decrease
LBR	0.35	Low SDI	272.78	204.63	111.83	92.8	Decrease	5723.55	10621.6	3629.78	2093.76	Decrease
LBY	0.73	High-middle SDI	89.4	98.89	12.84	86.05	Increase	2485.8	2407.42	294.77	2191.03	Increase
LCA	0.67	High SDI	137.29	50.79	13.54	37.26	Decrease	1409.13	3055.63	348.23	1060.9	Decrease
LKA	0.7	Middle SDI	229.47	83.94	13.1	70.84	Decrease	1946.47	5158.56	335.25	1611.23	Decrease
LSO	0.51	Low-middle SDI	201.85	238.48	64.79	173.69	Increase	7007.01	6484.83	1763.72	5243.29	Increase
LTU	0.86	High SDI	116.7	26.14	3.17	22.96	Decrease	530.82	2391.26	75.01	455.8	Decrease
LUX	0.88	High SDI	56.01	7.4	2.24	5.16	Decrease	168.97	1105.28	54.23	114.74	Decrease
LVA	0.83	High SDI	160.07	34.78	5.88	28.9	Decrease	738.84	3310.8	130.87	607.97	Decrease
MAR	0.56	Low-middle SDI	144.64	94.37	25.71	68.67	Decrease	2227.92	4175.52	673.57	1554.36	Decrease
MCO	0.91	High SDI	22.69	12.58	2.24	10.34	Decrease	283.6	470.86	54	229.6	Decrease
MDA	0.73	High-middle SDI	272.74	64.09	10.36	53.73	Decrease	1486.7	5826.68	246.32	1240.38	Decrease
MDG	0.4	Low SDI	302.7	247.94	97.31	150.63	Decrease	6804.67	9626.97	3000.74	3803.94	Decrease
MDV	0.65	High SDI	260.86	27.41	15.94	11.48	Decrease	673.06	7227.05	419.16	253.9	Decrease
MEX	0.66	High-middle SDI	102.28	41.6	14.45	27.15	Decrease	1068.2	2766.97	367.3	700.9	Decrease
MHL	0.57	Low-middle SDI	234.53	182.75	24.03	158.72	Decrease	4745.1	5984.82	630.91	4114.19	Decrease
MKD	0.75	High-middle SDI	221.82	132.59	7.82	124.77	Decrease	2391.46	5156.02	191.89	2199.57	Decrease
MLI	0.27	Low SDI	248.92	186.55	172.86	13.7	Decrease	6294.19	9436.88	5898.71	395.48	Decrease
MLT	0.8	High-middle SDI	64.82	16.66	6.57	10.09	Decrease	391.82	1310.64	157.76	234.06	Decrease
MMR	0.53	Low-middle SDI	430.5	241.86	29.37	212.49	Decrease	6029.14	13431	809.21	5219.93	Decrease
MNE	0.8	High-middle SDI	126.21	95.87	6.59	89.27	Decrease	1762.08	2938.53	158.67	1603.41	Decrease
MNG	0.62	Low-middle SDI	305.84	130.2	20.57	109.63	Decrease	2949.22	8883.35	539.34	2409.89	Decrease
MNP	0.77	High-middle SDI	36.09	33.68	7.03	26.65	Decrease	851.1	899.21	191.04	660.07	Decrease
MOZ	0.33	Low SDI	240.81	218.99	137.67	81.32	Decrease	6324.6	8832.9	4051.36	2273.25	Decrease
MRT	0.5	Low-middle SDI	267.4	170.03	68.92	101.11	Decrease	4416.75	8092.1	1954.12	2462.64	Decrease
MUS	0.72	High-middle SDI	54.13	24.55	13.09	11.46	Decrease	697.65	1372.26	334.27	363.38	Decrease
MWI	0.38	Low SDI	247.52	200.68	103.11	97.57	Decrease	5620.3	9029.87	3279.25	2341.05	Decrease
MYS	0.74	High-middle SDI	116.64	61.44	8.3	53.14	Decrease	1449.76	2916.2	202.1	1247.66	Decrease
NAM	0.62	Low-middle SDI	227.21	122.37	20.56	101.81	Decrease	3175.88	6316.22	544.29	2631.59	Decrease
NER	0.17	Low SDI	283.7	195.95	195.95	0	Decrease	5952.05	12059.5	5952.05	0	Decrease
NGA	0.5	Low-middle SDI	244.74	156.65	66.51	90.14	Decrease	5371.2	9455.13	1912.39	3458.81	Decrease
NIC	0.52	Low-middle SDI	107.72	57.12	39.73	17.39	Decrease	1536.05	3548.91	1055.05	481	Decrease
NIU	0.73	High-middle SDI	111.08	32.43	11.85	20.58	Decrease	955.4	2760.72	293.43	661.98	Decrease
NLD	0.89	High SDI	63.81	13.26	2.24	11.01	Decrease	288.36	1338.06	53.64	234.72	Decrease
NOR	0.92	High SDI	32.73	3.94	2.26	1.68	Decrease	89	675.4	54.73	34.27	Decrease
NPL	0.43	Low SDI	331.91	231.47	91.79	139.68	Decrease	5726.96	11355.9	2686.25	3040.71	Decrease
NRU	0.63	High-middle SDI	43.2	42.79	17.98	24.82	Decrease	1173.51	1211.25	469.84	703.66	Decrease
NZL	0.85	High SDI	15.63	6.8	3.55	3.26	Decrease	156.9	339.14	82.75	74.15	Decrease
OMN	0.77	High-middle SDI	184.61	109.53	6.89	102.64	Decrease	2383.54	4663.91	190.91	2192.63	Decrease
PAK	0.5	Low-middle SDI	233.18	206.49	66.8	139.7	Decrease	6278.18	8052.58	1915.54	4362.64	Decrease
PAN	0.71	Low SDI	66.99	17.69	13.09	4.6	Decrease	521.37	1751.87	335.22	186.15	Decrease
PER	0.66	High SDI	133.58	45.03	15.1	29.93	Decrease	1180.4	4569.19	392.02	788.38	Decrease
PHL	0.65	Low SDI	213.4	136.82	15.89	120.92	Decrease	3541.4	5864.1	420.1	3121.29	Decrease
PLW	0.75	High-middle SDI	36.02	33.09	7.63	25.46	Decrease	879.88	974.74	190.51	689.38	Decrease
PNG	0.42	Low SDI	375.86	302.69	93.53	209.16	Decrease	7890.02	10482.2	2859.32	5030.7	Decrease
POL	0.81	High SDI	166.53	43.76	6.55	37.21	Decrease	965.51	3726.38	148.9	816.61	Decrease
PRI	0.83	High SDI	14.88	5.99	5.97	0.01	Decrease	195.28	373.45	134.14	61.14	Decrease
PRK	0.57	Low-middle SDI	312.43	247.15	24.79	222.36	Decrease	5410.71	7028.53	652.69	4758.01	Decrease
PRT	0.74	High-middle SDI	51.66	7.65	7.65	0	Decrease	183.93	1021.15	183.93	0	Decrease
PRY	0.64	Low-middle SDI	107.39	41.7	17.19	24.51	Decrease	1068.69	2934.27	449.94	618.75	Decrease
PSE	0.63	High SDI	153.49	102.89	17.23	85.66	Decrease	2175.54	3457.49	446.22	1729.32	Decrease
QAT	0.85	High SDI	296.19	108.69	3.76	104.93	Decrease	2272.76	5899.72	86.94	2185.83	Decrease
ROU	0.77	High-middle SDI	176.34	48.37	7.05	41.32	Decrease	1067.43	3929.86	190.42	877.01	Decrease
RUS	0.81	High-middle SDI	136.69	38.85	6.55	32.3	Decrease	839	2924.94	155.72	683.28	Decrease
RWA	0.44	Low SDI	369.93	175.86	90.54	85.32	Decrease	4610	12105.5	2642.57	1967.43	Decrease
SAU	0.82	High SDI	170.29	135.62	6.25	129.37	Decrease	3177.46	4309.48	147.46	3030	Decrease
SDN	0.54	Low-middle SDI	333.14	189.38	28.14	161.24	Decrease	4748.13	10326.8	735.93	4012.2	Decrease
SEN	0.41	Low SDI	241.57	196.47	96.98	99.49	Decrease	5280.08	7923.49	2997.39	2282.69	Decrease
SGP	0.86	High SDI	107.49	18.8	3.15	15.65	Decrease	469.73	2417.38	74.39	395.34	Decrease
SLB	0.43	Low SDI	435.27	360.85	91.97	268.87	Decrease	8813.39	11105.8	2712.72	6100.67	Decrease
SLE	0.36	Low SDI	295.57	226.43	107.93	118.49	Decrease	6610.13	11202.1	3504.19	3105.95	Decrease
SLV	0.56	Low-middle SDI	121.14	45.53	25.73	19.79	Decrease	1165.2	3551.88	673.92	491.29	Decrease
SMR	0.89	High SDI	27.62	5.92	2.23	3.69	Decrease	157.55	570.43	53.76	103.79	Decrease
SOM	0.08	Low SDI	308.09	226.91	226.91	0	Decrease	7081.22	10546.2	7081.22	0	Decrease
SRB	0.79	High-middle SDI	252.55	91.52	6.61	84.91	Decrease	1827.93	5087.71	160.05	1667.88	Decrease
SSD	0.28	Low SDI	239.56	217.38	153.72	63.67	Decrease	7361.69	8583.53	4726.46	2635.23	Decrease
STP	0.51	Low-middle SDI	232.5	151.69	66	85.69	Decrease	3583.27	7018.73	1831.01	1752.27	Decrease
SUR	0.63	Low-middle SDI	125	69.71	17.03	52.68	Decrease	2130.22	3650.98	451.34	1678.88	Decrease
SVK	0.81	High SDI	133.34	44.95	6.56	38.4	Decrease	923.84	2988	155.37	768.47	Decrease
SVN	0.84	High SDI	73.59	16.15	4.09	12.06	Decrease	380.75	1652.05	91.25	289.5	Decrease
SWE	0.89	High SDI	28.27	3.45	2.24	1.21	Decrease	78.4	558.5	54.16	24.24	Decrease
SWZ	0.59	Low-middle SDI	234.12	158.84	23.19	135.65	Decrease	4362.33	6570.49	610.03	3752.3	Decrease
SYC	0.73	High-middle SDI	30.17	20.79	11.7	9.09	Decrease	589.2	795.88	277.72	311.48	Decrease
SYR	0.62	Low-middle SDI	148.47	127.9	19.15	108.75	Decrease	2690	3740.36	505.7	2184.3	Decrease
TCD	0.24	Low SDI	254.11	236.59	191.44	45.16	Decrease	7494.18	9245.15	6080.69	1413.5	Decrease
TGO	0.41	Low SDI	263.56	225.27	95.29	129.98	Decrease	6149.19	8588.79	2946.59	3202.6	Decrease
THA	0.68	Middle SDI	152.69	53.81	13.15	40.66	Decrease	1408.8	4007.33	335.21	1073.59	Decrease
TJK	0.54	Low-middle SDI	272.83	173.92	28.31	145.6	Decrease	4289.39	8033.66	735.63	3553.76	Decrease
TKL	0.69	High SDI	28.26	20.39	13.1	7.28	Decrease	672	744.25	334.62	337.39	Decrease
TKM	0.68	Middle SDI	118.51	104.51	13.17	91.34	Decrease	2550.78	3379.92	335.34	2215.44	Decrease
TLS	0.44	Low SDI	275.03	193.07	88.79	104.28	Decrease	4870.76	9484.96	2559.85	2310.91	Decrease
TON	0.63	High SDI	181.06	110.54	18.02	92.52	Decrease	2725.75	4570.91	469.32	2256.43	Decrease
TTO	0.77	High-middle SDI	112.55	63.21	7.02	56.18	Decrease	1719.63	2736.73	188.53	1531.11	Decrease
TUN	0.68	Middle SDI	103.02	66.46	13.13	53.33	Decrease	1531.52	2708.02	335.5	1196.02	Decrease
TUR	0.71	High-middle SDI	127.13	68.21	13.13	55.08	Decrease	1495.28	3607.88	334.59	1160.69	Decrease
TUV	0.58	Low-middle SDI	299.78	63.93	24.07	39.86	Decrease	1604.44	8541.33	627.31	977.12	Decrease
TWN	0.87	High SDI	73.6	24.17	2.29	21.88	Decrease	607.83	1612.09	53.91	553.92	Decrease
TZA	0.45	Low SDI	222.97	165.47	89.05	76.42	Decrease	4772.29	8059.83	2563.77	2208.53	Decrease
UGA	0.42	Low SDI	225.88	160	93.49	66.51	Decrease	4556.24	7131.32	2864.34	1691.9	Decrease
UKR	0.76	High-middle SDI	174.33	78.21	7.57	70.64	Decrease	1559.19	3526.91	190.64	1368.55	Decrease
URY	0.72	High-middle SDI	53.04	17.3	13.1	4.2	Decrease	415.64	1253.71	334.43	81.21	Decrease
USA	0.86	High SDI	41.63	8.2	2.37	5.83	Decrease	224.4	947.75	58.96	165.44	Decrease
UZB	0.66	High-middle SDI	186.16	152.77	15.03	137.74	Decrease	3536.77	5242.66	387.07	3149.71	Decrease
VCT	0.64	Middle SDI	124.35	63.04	16.62	46.41	Decrease	1585.15	2969.09	436.91	1148.24	Decrease
VEN	0.6	Low-middle SDI	73.4	42.28	22.59	19.69	Decrease	1123.08	1975.96	596.49	526.59	Decrease
VIR	0.82	High SDI	23.44	10.86	6.11	4.75	Decrease	319.71	578.26	137.01	182.71	Decrease
VNM	0.63	High SDI	231.42	117.31	18	99.3	Decrease	2618.71	6225.83	468.93	2149.78	Decrease
VUT	0.47	Low-middle SDI	396.29	321.2	76.66	244.54	Decrease	8039.26	10039.8	2268.07	5771.19	Decrease
WSM	0.59	Low-middle SDI	277.98	196.33	22.58	173.74	Decrease	4777.26	6803.61	597.13	4180.13	Decrease
YEM	0.45	Low SDI	308.97	193.38	87.73	105.65	Decrease	4849.65	9350.53	2487.32	2362.33	Decrease
ZAF	0.68	Low-middle SDI	106.91	81.98	13.21	68.77	Decrease	2396.63	3897.51	337.15	2059.48	Decrease
ZMB	0.51	Low-middle SDI	233.13	188.79	66.08	122.71	Decrease	5092.56	7814.88	1840.81	3251.75	Decrease
ZWE	0.47	Low-middle SDI	176.39	212.11	76.44	135.67	Increase	6127.39	5091.93	2271.17	3856.22	Increase
DALYs = disability-adjusted life-years. EF = efficiency difference. PMP = particulate matter pollution. SDI = socio-demographic index.
