# Supplementary material for: Global, regional, and national burden of particulate matter pollution (1990–2021) and projections to 2042: A comprehensive analysis for the Global Burden of Disease database
Source: Research Square preprint supplement (doi:10.21203/rs.3.rs-7087796/v1), 2025-08-13
Supplement: Supplementary file 6 [file 982054a2ec9b9afb53c7eb47.xlsx]

## Sheet: Table
Table: PMP-attributable burdens globally and by super-region, 1990 and 2021
	Mortality (95% UI)				DALYs (95% UI)
	Rate (per 100 000), age-standardized, 1990	Rate (per 100 000), age-standardized, 2021	Number (in millions), all ages, 1990	Number (in millions), all ages, 2021	Rate (per 100 000), age-standardized, 1990	Rate (per 100 000), age-standardized, 2021	Number (in millions), all ages, 1990	Number (in millions), all ages, 2021
Global	182.73 (153.27–211.42)	96.69 (79.91–114.40)	7.25 (6.03–8.45)	7.83 (6.48–9.26)	5865.15 (4690.12–6998.30)	2984.47 (2489.63–3487.35)	289.35 (222.30–350.59)	231.51 (194.54–270.86)
Andean Latin America	142.17 (100.59–176.39)	46.43 (31.23–64.63)	0.03 (0.02–0.04)	0.03 (0.02–0.04)	4626.50 (3122.62–5917.55)	1211.71 (860.75–1656.88)	1.69 (1.02–2.23)	0.72 (0.51–0.98)
Australasia	16.42 (0.91–43.43)	8.09 (4.90–11.83)	0.00 (0.00–0.01)	0.00 (0.00–0.01)	342.98 (37.92–864.90)	183.52 (112.59–260.79)	0.08 (0.01–0.20)	0.09 (0.06–0.14)
Caribbean	117.39 (85.01–158.59)	74.67 (52.85–98.56)	0.03 (0.02–0.04)	0.04 (0.03–0.05)	3778.94 (2799.27–4913.68)	2553.18 (1880.54–3267.52)	1.24 (0.91–1.59)	1.22 (0.91–1.56)
Central Asia	174.14 (114.44–240.33)	118.16 (91.88–147.44)	0.08 (0.05–0.12)	0.08 (0.06–0.10)	4940.86 (3170.90–7055.75)	2809.87 (2236.53–3473.88)	3.07 (1.92–4.45)	2.29 (1.81–2.84)
Central Europe	164.45 (108.31–222.14)	50.50 (38.71–66.60)	0.22 (0.14–0.30)	0.12 (0.09–0.16)	3682.52 (2523.41–4896.16)	1087.55 (859.68–1391.42)	5.00 (3.37–6.66)	2.31 (1.82–2.98)
Central Latin America	102.43 (74.51–129.69)	41.47 (30.24–55.32)	0.09 (0.07–0.11)	0.10 (0.07–0.13)	2910.86 (2181.98–3666.57)	1108.17 (835.61–1445.30)	3.90 (2.84–4.96)	2.67 (2.00–3.49)
Central Sub-Saharan Africa	280.83 (213.70–348.38)	206.07 (154.33–264.54)	0.09 (0.06–0.11)	0.11 (0.08–0.14)	8817.68 (6304.42–11118.22)	5363.23 (4051.65–6767.83)	5.28 (3.35–7.15)	4.82 (3.61–6.29)
East Asia	359.56 (310.17–411.67)	124.30 (97.54–156.01)	2.29 (1.96–2.62)	2.36 (1.85–2.98)	7993.20 (6673.06–9261.57)	2443.38 (1936.26–3055.29)	67.71 (54.60–79.05)	48.60 (38.26–61.69)
Eastern Europe	149.27 (80.08–215.27)	48.81 (31.49–71.01)	0.37 (0.19–0.53)	0.17 (0.11–0.25)	3140.55 (1772.34–4451.34)	1022.19 (678.31–1445.77)	8.00 (4.40–11.53)	3.44 (2.25–4.92)
Eastern Sub-Saharan Africa	259.82 (189.52–317.23)	171.82 (136.68–205.19)	0.32 (0.21–0.41)	0.33 (0.26–0.40)	9119.45 (6197.63–11483.83)	5060.24 (4014.19–6051.27)	20.85 (13.08–27.88)	16.54 (12.85–20.55)
High-income Asia Pacific	32.88 (9.92–63.66)	12.94 (7.71–18.28)	0.06 (0.02–0.11)	0.08 (0.04–0.11)	728.05 (250.24–1334.86)	362.93 (239.33–492.07)	1.36 (0.45–2.51)	1.58 (0.99–2.20)
High-income North America	40.22 (17.22–67.68)	7.75 (3.84–12.17)	0.14 (0.06–0.24)	0.05 (0.03–0.08)	909.77 (409.68–1482.70)	212.05 (111.00–329.63)	3.07 (1.35–5.08)	1.27 (0.64–2.03)
North Africa and Middle East	187.38 (154.50–220.36)	116.25 (95.01–136.53)	0.33 (0.27–0.40)	0.45 (0.37–0.54)	5333.31 (4339.59–6381.14)	2871.13 (2365.27–3385.30)	14.99 (11.29–19.03)	13.61 (11.12–15.98)
Oceania	327.77 (261.38–403.92)	255.72 (197.08–314.71)	0.01 (0.01–0.01)	0.02 (0.01–0.02)	9143.94 (7219.39–11459.07)	6922.92 (5336.57–8527.45)	0.45 (0.30–0.58)	0.71 (0.55–0.89)
South Asia	262.18 (220.22–300.55)	193.96 (163.84–221.42)	1.75 (1.43–2.01)	2.53 (2.14–2.87)	8984.51 (7294.60–10413.94)	5480.42 (4694.75–6270.19)	92.55 (69.74–110.67)	80.56 (68.75–92.31)
Southeast Asia	224.28 (185.24–258.69)	114.17 (87.09–143.34)	0.57 (0.46–0.66)	0.64 (0.49–0.81)	6610.05 (5336.42–7768.10)	2916.48 (2305.56–3588.58)	23.83 (18.12–29.26)	18.30 (14.43–22.60)
Southern Latin America	76.05 (44.22–112.26)	26.47 (14.88–38.92)	0.03 (0.02–0.05)	0.02 (0.01–0.03)	1824.43 (1126.90–2618.41)	650.33 (408.66–910.17)	0.84 (0.52–1.20)	0.53 (0.33–0.75)
Southern Sub-Saharan Africa	124.77 (92.70–157.35)	101.85 (76.09–130.25)	0.04 (0.03–0.05)	0.05 (0.04–0.07)	4287.29 (3102.77–5444.93)	3124.52 (2372.35–4045.47)	2.07 (1.39–2.70)	2.03 (1.52–2.65)
Tropical Latin America	101.71 (63.36–143.71)	26.78 (15.70–37.87)	0.09 (0.06–0.12)	0.07 (0.04–0.09)	2948.61 (1956.88–4014.72)	716.68 (444.88–981.23)	3.37 (2.29–4.57)	1.76 (1.07–2.43)
Western Europe	57.72 (30.00–90.78)	11.48 (8.21–15.14)	0.34 (0.18–0.54)	0.13 (0.09–0.17)	1175.74 (633.44–1784.53)	265.98 (193.43–348.72)	6.50 (3.40–9.98)	2.38 (1.70–3.14)
Western Sub-Saharan Africa	249.78 (191.81–299.71)	179.43 (143.01–214.86)	0.36 (0.25–0.46)	0.46 (0.35–0.57)	9222.06 (6425.41–11726.77)	5657.04 (4437.86–6939.28)	23.50 (14.92–31.49)	26.06 (19.47–33.21)
DALYs = disability-adjusted life-years. PMP = particulate matter pollution. UI = uncertainty interval.
