# Supplementary material for: Global, regional, and national burden of particulate matter pollution (1990–2021) and projections to 2042: A comprehensive analysis for the Global Burden of Disease database
Source: Research Square preprint supplement (doi:10.21203/rs.3.rs-7087796/v1), 2025-08-13
Supplement: Supplementary file 7 [file a19688068a89612d39f87fbc.xlsx]

## Sheet: Table_S9
Table S9: PMP-attributable burdens, population, and SDI, by country and territory, 1990 and 2021
	1990							2021
	Population	Cumulative fraction of population ranked by SDI	Relactive rank by SDI	Crude mortality rate (per 100 000)	Cumlative fraction of mortality	Crude DALYs rate (per 100 000)	Cumlative fraction of DALYs	Population	Cumulative fraction of population ranked by SDI	Relactive rank by SDI	Crude mortality rate (per 100 000)	Cumlative fraction of mortality	Crude DALYs rate (per 100 000)	Cumlative fraction of DALYs
Afghanistan	9.94347e+06	0.021405	0.020472	332.38	0.0342132	15658.1	0.0557646	3.12222e+07	0.0273123	0.0253325	97.596	0.0286275	4470.57	0.0547917
Albania	3.3052e+06	0.751309	0.750998	118.437	0.833698	3701.39	0.909602	2.66786e+06	0.608002	0.607832	99.1476	0.618109	1840.69	0.732076
Algeria	2.52881e+07	0.623605	0.621232	45.0513	0.762707	1811.25	0.840302	4.4198e+07	0.539084	0.536282	48.8702	0.5761	1324.86	0.693936
American Samoa	48503.1	0.771051	0.771047	11.5142	0.845667	455.596	0.917936	49758.6	0.806371	0.806368	23.7955	0.918877	752.078	0.941762
Andorra	54362.1	0.900994	0.900989	29.821	0.957325	688.387	0.978418	85593.3	0.951868	0.951862	14.8126	0.983645	309.426	0.988811
Angola	1.02763e+07	0.0702338	0.0692696	174.458	0.102639	11543.1	0.159659	3.27065e+07	0.100343	0.098269	51.2353	0.0916227	2534.16	0.151639
Antigua and Barbuda	60227.5	0.771042	0.771036	57.3631	0.845666	1305.21	0.917935	89395.7	0.818276	0.818271	42.7535	0.925241	1135.19	0.947223
Argentina	3.31111e+07	0.763468	0.760361	64.3558	0.839648	1689.32	0.91354	4.54872e+07	0.806365	0.803481	34.1807	0.918876	760.535	0.94176
Armenia	3.42062e+06	0.746719	0.746398	114.773	0.831543	3427.53	0.907926	2.99528e+06	0.607663	0.607473	138.819	0.617771	2850.36	0.731864
Australia	1.6859e+07	0.874097	0.872515	18.4298	0.941476	382.024	0.970888	2.57919e+07	0.893687	0.892052	16.4798	0.973214	319.029	0.980547
Austria	7.76821e+06	0.899402	0.898673	102.684	0.956984	1917.86	0.978243	8.98231e+06	0.899292	0.898722	32.5365	0.974656	588.177	0.981841
Azerbaijan	7.32643e+06	0.76792	0.767232	121.84	0.842944	5037.44	0.91636	1.05002e+07	0.593032	0.592366	75.5832	0.608242	2030.3	0.72406
Bahrain	506462	0.754761	0.754714	76.5164	0.835417	1070.85	0.966499	1.5296e+06	0.818746	0.818649	48.8313	0.925752	987.359	0.961024
Bangladesh	1.09121e+08	0.0595987	0.0493597	203.623	0.089203	2611.43	0.910782	1.64636e+08	0.130717	0.120278	140.675	0.130624	1557.06	0.94762
Barbados	253415	0.807974	0.80795	81.6559	0.890112	11952.2	0.138356	299025	0.818257	0.818238	78.5875	0.92523	4191.62	0.194389
Belarus	1.04444e+07	0.777399	0.776419	180.804	0.853795	1774.08	0.942281	9.32466e+06	0.837607	0.837015	120.125	0.941387	1766.36	0.947213
Belgium	9.97887e+06	0.887192	0.886255	102.922	0.947459	3843.4	0.922563	1.14693e+07	0.898152	0.897425	28.821	0.974283	2335.52	0.958033
Belize	186922	0.346733	0.346716	55.3817	0.417075	1974.53	0.973681	429075	0.430402	0.430375	36.9785	0.506553	563.106	0.981612
Benin	4.85064e+06	0.0391206	0.0386655	190.544	0.0585278	2296.88	0.570909	1.34992e+07	0.0449186	0.0440626	94.8355	0.0421157	1157.82	0.62679
Bermuda	59382.5	0.858658	0.858653	28.3315	0.932623	11963.9	0.0932484	63540.8	0.879541	0.879537	16.1086	0.969601	5233.38	0.0790319
Bhutan	630055	0.0345001	0.0344409	128.536	0.0526187	644.74	0.966501	756900	0.100439	0.100391	75.1349	0.0916954	350.714	0.978238
Bolivarian Republic of Venezuela	1.88073e+07	0.726173	0.724409	38.6856	0.81928	7989.05	0.084265	2.66288e+07	0.414585	0.412896	44.6043	0.490281	2091.09	0.151707
Bosnia and Herzegovina	4.49828e+06	0.739131	0.738709	158.777	0.827386	7431.76	0.572549	3.30286e+06	0.800596	0.800387	174.194	0.916889	1513.43	0.611801
Botswana	1.31923e+06	0.346248	0.346124	101.173	0.416593	4105.19	0.902903	2.39326e+06	0.449222	0.449071	41.2469	0.522842	3493.18	0.940265
Brazil	1.48509e+08	0.676076	0.662141	57.3887	0.791169	4910.52	0.570367	2.20356e+08	0.491693	0.47772	28.8639	0.543585	1616.94	0.640896
Brunei Darussalam	259257	0.811143	0.811119	10.398	0.892537	2204.04	0.866763	451136	0.869213	0.869184	8.93155	0.962044	768.583	0.661605
Bulgaria	8.68006e+06	0.788224	0.78741	222.063	0.868785	314.813	0.943773	6.78693e+06	0.82508	0.82465	159.596	0.935004	318.348	0.971679
Burkina Faso	9.52811e+06	0.00754189	0.00664785	188.954	0.0113598	4959.67	0.931073	2.27611e+07	0.0153367	0.0138934	100.663	0.0166499	3133.4	0.953563
Burundi	5.55336e+06	0.0323107	0.0317896	200.546	0.0494176	12683	0.0197393	1.32203e+07	0.0170133	0.016175	84.4965	0.018077	5713.2	0.034929
Cambodia	1.02728e+07	0.0780997	0.0771358	214.16	0.113144	11076.8	0.0792423	1.70441e+07	0.10264	0.101559	128.013	0.0945438	4179.26	0.0373172
Cameroon	1.04369e+07	0.0910382	0.0900588	136.974	0.128749	4033.65	0.162868	3.17796e+07	0.108743	0.106728	79.4166	0.0997796	2143.53	0.309025
Canada	2.72529e+07	0.953912	0.951355	30.5349	0.977331	13048.9	0.175629	3.74692e+07	0.972814	0.970438	8.70781	0.990365	4035.49	0.154751
Central African Republic	2.73064e+06	0.0382104	0.0379541	233.37	0.0572518	8201.92	0.197975	5.48413e+06	0.0177088	0.0173611	140.812	0.0190635	3805.2	0.163087
Chad	6.02646e+06	0.00412812	0.00356264	209.13	0.00644262	627.085	0.989075	1.77494e+07	0.00816653	0.00704103	128.47	0.00883641	191.376	0.993147
Chile	1.32856e+07	0.757254	0.756008	70.2909	0.836706	14461	0.0912413	1.87978e+07	0.835819	0.834627	36.7908	0.93975	7516.15	0.0390989
China	1.17646e+09	0.618713	0.508324	190.142	0.761033	13325.1	0.0114002	1.42275e+09	0.800177	0.70996	159.792	0.916154	8133.3	0.0188661
Colombia	3.24915e+07	0.644266	0.641218	55.6318	0.773936	1791.22	0.911605	4.90604e+07	0.497915	0.494804	29.126	0.54541	865.733	0.956867
Commonwealth of the Bahamas	256701	0.858647	0.858623	32.249	0.932621	5637.28	0.838613	387966	0.841983	0.841958	32.8217	0.946083	3280.76	0.939766
Comoros	462568	0.0683053	0.0682619	165.198	0.100164	2110.39	0.851431	744374	0.104712	0.104665	94.7037	0.0965554	710.207	0.663111
Congo	2.40178e+06	0.346698	0.346473	140.986	0.417061	10433.6	0.155556	5.3916e+06	0.411021	0.410679	75.7244	0.488612	3808.09	0.15786
Cook Islands	18923	0.754056	0.754054	24.0082	0.83508	6350.01	0.570894	17747.5	0.836424	0.836423	20.7485	0.939956	2747.87	0.609458
Costa Rica	3.0417e+06	0.73346	0.733175	37.5818	0.824249	801.5	0.910575	4.7479e+06	0.604459	0.604158	20.9988	0.614702	578.209	0.957092
Croatia	4.86139e+06	0.816571	0.816115	138.636	0.895451	1141.55	0.900178	4.20864e+06	0.841858	0.841591	90.2166	0.946039	571.889	0.729368
Cuba	1.08471e+07	0.753344	0.752326	68.7171	0.834727	2891.64	0.945455	1.12695e+07	0.573369	0.572654	84.6243	0.5939	1637.15	0.960987
Cyprus	778050	0.805892	0.805819	74.7855	0.887488	1551.76	0.910184	1.35778e+06	0.881734	0.881648	36.9914	0.970853	1751.76	0.710675
Czech Republic	1.02944e+07	0.849724	0.848758	168.108	0.929864	1506.08	0.940787	1.06324e+07	0.881325	0.880651	68.0106	0.970589	740.431	0.979058
Democratic People's Republic of Korea	2.05914e+07	0.648207	0.646274	190.297	0.779403	3519.44	0.964607	2.63923e+07	0.230941	0.229267	273.619	0.233146	1305.1	0.978891
Democratic Republic of the Congo	3.81477e+07	0.0852586	0.0816792	152.372	0.121169	9583.24	0.166911	9.00178e+07	0.0563348	0.0506267	87.0804	0.0521299	4799.69	0.123027
Denmark	5.14373e+06	0.983699	0.983217	108.744	0.986219	5567.82	0.855443	5.85178e+06	0.98735	0.986978	26.1768	0.996025	6355.31	0.34539
Djibouti	414245	0.307254	0.307215	76.7001	0.381437	9084.24	0.187615	1.25869e+06	0.108902	0.108823	52.7319	0.0998644	3753.15	0.0936354
Dominica	72422.6	0.754052	0.754045	101.597	0.835079	2023.25	0.993572	67076.8	0.818265	0.818261	69.2566	0.925236	477.52	0.99747
Dominican Republic	7.15087e+06	0.352057	0.351386	64.0198	0.42026	4692.69	0.533126	1.10129e+07	0.43253	0.431832	48.6245	0.507729	2148.95	0.163204
Ecuador	9.97818e+06	0.728046	0.72711	62.1946	0.820137	2469.67	0.910575	1.80654e+07	0.541375	0.54023	29.1936	0.576773	1779.29	0.947218
Egypt	5.53333e+07	0.346	0.340808	142.613	0.416409	3000.27	0.574579	1.05627e+08	0.430347	0.423649	109.661	0.506533	1493.86	0.628034
El Salvador	5.30568e+06	0.314054	0.313556	78.2645	0.385689	2484.8	0.896958	6.45023e+06	0.223251	0.222842	46.8049	0.220166	787.537	0.694551
Equatorial Guinea	422803	0.0675342	0.0674945	197.81	0.0993251	6332.8	0.570143	1.51231e+06	0.533479	0.533383	35.711	0.57334	3137.27	0.626768
Eritrea	3.40594e+06	0.0376979	0.0373783	149.99	0.0563721	3157.76	0.537685	6.59791e+06	0.0632596	0.0628413	84.7439	0.0583983	1125.9	0.333
Estonia	1.5685e+06	0.847267	0.84712	119.674	0.92671	11249.6	0.15422	1.31083e+06	0.893854	0.89377	17.2863	0.973243	1520.59	0.691405
Ethiopia	5.05687e+07	0.0170318	0.0122868	215.799	0.0264253	9358.36	0.0898756	1.08938e+08	0.0432067	0.0362988	69.7606	0.0404802	3838.58	0.103482
Federated States of Micronesia	103481	0.63441	0.634401	152.566	0.768665	2437.34	0.962961	102578	0.411181	0.411174	105.998	0.488732	332.474	0.980566
Fiji	758377	0.733603	0.733532	97.2505	0.82435	5175.32	0.543361	924474	0.573522	0.573463	88.8717	0.594028	2772.15	0.609596
Finland	5.00999e+06	0.900984	0.900514	37.0093	0.957323	14520.7	0.045135	5.53593e+06	0.909671	0.90932	7.88797	0.977245	3750.57	0.0759783
France	5.77712e+07	0.885308	0.879888	54.1503	0.94604	3448.36	0.900269	6.63899e+07	0.890154	0.885944	20.1822	0.972565	2742.78	0.710805
Gabon	983536	0.36322	0.363128	89.4218	0.425198	751.124	0.978417	1.81608e+06	0.447995	0.44788	51.4184	0.522413	148.275	0.983615
Georgia	5.52303e+06	0.810021	0.809503	154.696	0.892342	989.454	0.972999	3.60729e+06	0.812136	0.811908	120.247	0.922598	369.934	0.98012
Germany	7.99408e+07	0.998706	0.991205	118.01	0.999244	3686.43	0.579987	8.53718e+07	0.998176	0.992763	34.0413	0.999738	1786.51	0.640448
Ghana	1.49715e+07	0.316864	0.315459	137.924	0.38854	9628.08	0.14234	3.42459e+07	0.227594	0.225422	85.8231	0.223921	4450.8	0.108197
Greece	1.03893e+07	0.846856	0.845881	105.484	0.92635	3948.11	0.943625	1.01749e+07	0.840114	0.839469	74.2976	0.943446	2514.17	0.944971
Greenland	55559.4	0.885319	0.885314	14.4779	0.946041	2199.53	0.999654	56102.5	0.879976	0.879973	9.35336	0.969665	637.949	0.999824
Grenada	87011.9	0.350715	0.350707	114.495	0.419628	7635.79	0.541639	102627	0.573382	0.573376	64.6254	0.593909	3472.1	0.33814
Guam	136808	0.847293	0.84728	12.8746	0.926712	2047.84	0.962768	159196	0.841934	0.841924	24.7883	0.946067	1302.67	0.959353
Guatemala	8.38429e+06	0.133843	0.133057	111.298	0.182937	478.856	0.973	1.57674e+07	0.210923	0.209923	55.5742	0.210705	259.171	0.978291
Guinea	5.99404e+06	0.0225299	0.0219674	255.888	0.0363307	2921.82	0.573837	1.34298e+07	0.0233527	0.0225011	118.174	0.0247347	1771.49	0.710683
Guinea-Bissau	1.00711e+06	0.0336027	0.0335082	223.918	0.0510674	441.584	0.962963	2.06391e+06	0.0282665	0.0281356	110.586	0.0295058	800.413	0.961007
Guyana	779664	0.61886	0.618786	94.0504	0.761134	6544.35	0.278936	764740	0.449319	0.449271	72.4601	0.522912	1787.43	0.322701
Haiti	6.38082e+06	0.110645	0.110047	210.775	0.156667	16483.9	0.0591818	1.2864e+07	0.0919283	0.0911126	137.24	0.0861921	5924	0.0487583
Honduras	4.71011e+06	0.142358	0.141916	77.2203	0.197436	13541	0.0817741	1.01102e+07	0.194487	0.193846	78.1446	0.192546	5389.33	0.0562201
Hungary	1.03949e+07	0.807843	0.806867	178.754	0.890054	3873.81	0.838718	9.59731e+06	0.838824	0.838215	89.2216	0.942481	2359.05	0.640974
Iceland	253894	0.948726	0.948702	18.4843	0.976141	10343.3	0.242603	350386	0.976483	0.976461	5.44556	0.991788	5344.76	0.143723
India	8.53065e+08	0.302447	0.222402	153.443	0.378146	3742.85	0.29518	1.41449e+09	0.410336	0.320642	141.079	0.488089	2106.73	0.303349
Indonesia	1.84983e+08	0.397935	0.380578	105.782	0.452213	4035.27	0.942237	2.78914e+08	0.533287	0.515601	78.191	0.573271	1798.8	0.95878
Iraq	1.84174e+07	0.335616	0.333888	95.8061	0.405515	357.343	0.988464	4.12243e+07	0.555545	0.552931	70.305	0.586545	105.467	0.994243
Ireland	3.60213e+06	0.870933	0.870595	63.2963	0.941047	7894.83	0.528105	4.94137e+06	0.973441	0.973128	12.0587	0.990441	4308.37	0.608817
Islamic Republic of Iran	5.71001e+07	0.363036	0.357678	58.3968	0.425077	4572.84	0.609243	8.53559e+07	0.603857	0.598445	58.0733	0.614575	2338.62	0.691305
Israel	4.96106e+06	0.870257	0.869791	64.4649	0.940733	2548.54	0.579862	9.59394e+06	0.869156	0.868547	27.6065	0.962039	1406.88	0.729251
Italy	5.67986e+07	0.869317	0.863988	97.7833	0.94029	4184.63	0.558024	5.98115e+07	0.849568	0.845776	49.1805	0.949841	2136.87	0.704184
Jamaica	2.36553e+06	0.734047	0.733825	75.9562	0.824598	1249.21	0.970666	2.79989e+06	0.5917	0.591523	51.1935	0.607228	236.566	0.993197
Japan	1.25828e+08	0.979137	0.96733	30.8095	0.983329	1389.07	0.97051	1.27697e+08	0.968062	0.959965	38.6379	0.989948	566.306	0.971673
Jordan	3.73572e+06	0.738287	0.737936	36.5605	0.8264	1919.32	0.970271	1.23246e+07	0.810338	0.809557	28.95	0.920985	820.71	0.963146
Kazakhstan	1.63929e+07	0.766545	0.765007	91.1745	0.841711	2232.89	0.900451	1.89555e+07	0.808775	0.807573	68.2446	0.92053	1237.83	0.723138
Kenya	2.31472e+07	0.306791	0.304619	87.0729	0.380928	644.198	0.992166	5.00624e+07	0.200836	0.197662	59.617	0.196359	729.243	0.992837
Kingdom of Eswatini	806391	0.318956	0.318881	100.464	0.389836	1636.95	0.902264	1.15524e+06	0.411168	0.411095	71.9188	0.488718	1007.04	0.943648
Kiribati	74406.5	0.33216	0.332153	164.321	0.403079	2722.84	0.915084	121161	0.201697	0.201689	111.763	0.196693	1647.97	0.943112
Kuwait	1.71855e+06	0.811094	0.810933	36.6453	0.892534	5444.48	0.532464	4.65008e+06	0.894443	0.894148	37.9553	0.973469	2433.05	0.308614
Kyrgyzstan	4.4639e+06	0.728883	0.728465	156.295	0.8211	7194.84	0.555358	6.86308e+06	0.416952	0.416516	78.341	0.491735	4059.23	0.308973
Lao People's Democratic Republic	4.16949e+06	0.0674548	0.0670636	281.041	0.0992096	1380.67	0.94377	7.37755e+06	0.109838	0.10937	124.334	0.101036	1316.07	0.98083
Latvia	2.6581e+06	0.847792	0.847542	207.735	0.927474	5539.49	0.897813	1.87033e+06	0.881562	0.881443	84.01	0.970789	2169.08	0.612445
Lebanon	2.99198e+06	0.734608	0.734327	53.8149	0.824821	15557.4	0.154056	5.54043e+06	0.818219	0.817867	51.4405	0.9252	4249.84	0.16456
Lesotho	1.53257e+06	0.307542	0.307398	133.028	0.381719	4248.53	0.963354	1.87438e+06	0.193205	0.193086	130.924	0.191536	1532.18	0.979015
Liberia	2.46062e+06	0.0600605	0.0598296	224.803	0.0899667	1734.16	0.900631	5.45948e+06	0.0280047	0.0276585	84.1241	0.0292142	1188.08	0.94719
Libya	4.21502e+06	0.73289	0.732494	42.8083	0.824091	6552.58	0.533474	6.87057e+06	0.81121	0.810774	64.8425	0.921555	5073.03	0.302428
Lithuania	3.67434e+06	0.815659	0.815314	139.046	0.894521	14941.6	0.139627	2.7283e+06	0.900364	0.900191	63.3633	0.975075	4015.72	0.0557393
Luxembourg	381176	0.948797	0.948762	77.5397	0.976182	1674.73	0.900058	644266	0.976565	0.976524	13.5125	0.9918	1922	0.944219
Madagascar	1.19006e+07	0.0761719	0.0750552	177.156	0.110107	2822.01	0.944968	2.85574e+07	0.0624229	0.060612	96.6468	0.057684	1106.38	0.98214
Malawi	9.8057e+06	0.0312686	0.0303485	179.404	0.0478801	1508.74	0.988484	1.94478e+07	0.0588012	0.057568	81.6343	0.0541581	271.273	0.994251
Malaysia	1.76669e+07	0.75024	0.748582	58.6328	0.833021	9919.18	0.170993	3.18122e+07	0.816171	0.814154	47.9038	0.924545	4514.27	0.102387
Maldives	222258	0.141474	0.141453	113.229	0.196934	12253.3	0.0771148	517208	0.449385	0.449352	14.8834	0.522922	3782.49	0.0968151
Mali	8.66283e+06	0.00575381	0.00494096	203.328	0.00887431	1811.19	0.909069	2.41041e+07	0.0112234	0.00969499	108.805	0.0121869	1271.61	0.94672
Malta	370590	0.810091	0.810056	69.3518	0.892377	5586.76	0.29457	442219	0.841914	0.841886	40.8243	0.946062	440.736	0.640984
Marshall Islands	45427.5	0.350698	0.350694	80.3661	0.419614	13883.7	0.0155598	56273.1	0.230948	0.230944	92.3537	0.233153	6972.09	0.0261303
Mauritania	2.05462e+06	0.307177	0.306984	164.096	0.381394	1434.11	0.943643	4.39623e+06	0.131275	0.130996	83.7673	0.131094	795.335	0.961002
Mauritius	1.09595e+06	0.746925	0.746822	31.6974	0.831591	3077.09	0.573828	1.27196e+06	0.619311	0.61923	32.929	0.625582	3304	0.345398
Mexico	8.5391e+07	0.696107	0.688094	50.9963	0.800543	8379.86	0.533059	1.29276e+08	0.57194	0.563742	37.1584	0.592682	3280.52	0.195012
Mongolia	2.15782e+06	0.635823	0.63562	170.173	0.770433	975.593	0.907963	3.33629e+06	0.431133	0.430922	70.5882	0.507044	919.81	0.737913
Montenegro	626192	0.846973	0.846914	116.655	0.926451	2159.34	0.876535	618060	0.841324	0.841285	133.019	0.945554	1008.99	0.709822
Morocco	2.5357e+07	0.313059	0.310679	86.7192	0.385116	5545.09	0.84605	3.71766e+07	0.222433	0.220075	74.7741	0.21978	3407.2	0.609611
Mozambique	1.336e+07	0.019539	0.0182854	174.863	0.0296505	1021.11	0.999655	3.10727e+07	0.0216495	0.0196792	91.7895	0.0227072	683.756	0.999825
Myanmar	4.04385e+07	0.141432	0.137638	250.083	0.196899	7868.57	0.848106	5.64197e+07	0.208923	0.205346	178.006	0.209586	2130.13	0.627323
Namibia	1.40406e+06	0.35232	0.352188	110.085	0.420473	2798.77	0.962829	2.43117e+06	0.43071	0.430556	61.4139	0.506744	2598.96	0.960689
Nepal	1.94692e+07	0.0294284	0.0276016	216.101	0.0454515	3564.58	0.537106	3.11298e+07	0.0810243	0.0790503	149.554	0.076455	1994.77	0.332686
Netherlands	1.49219e+07	0.981937	0.980537	86.5609	0.985112	11351	0.0503798	1.72107e+07	0.986607	0.985516	29.8902	0.995829	4631.47	0.0453195
New Zealand	3.41728e+06	0.900044	0.899723	17.4548	0.957067	11148	0.294527	5.16951e+06	0.896698	0.89637	11.8699	0.97386	5108.46	0.321483
Nicaragua	3.88753e+06	0.308271	0.307907	61.3502	0.382048	5148.39	0.574829	6.66898e+06	0.201682	0.201259	37.2584	0.196676	2151.32	0.627016
Niger	8.03223e+06	0.00299717	0.00224349	252.124	0.00470269	779.231	0.902053	2.50382e+07	0.00591554	0.00432785	98.3477	0.00592333	759.294	0.629466
Nigeria	9.00418e+07	0.109425	0.100976	197.074	0.154785	12771.5	0.0729593	2.31166e+08	0.160592	0.145933	89.1189	0.157413	4431.37	0.129148
Northern Mariana Islands	45122.5	0.869326	0.869321	11.5293	0.940291	1728.07	0.993058	48492.2	0.835825	0.835822	28.9054	0.939752	561.165	0.997349
Norway	4.24613e+06	0.982734	0.982336	57.0479	0.985447	375.379	0.978287	5.41807e+06	0.998868	0.998525	8.45152	0.999798	239.363	0.981333
Oman	1.98441e+06	0.348303	0.348117	64.8727	0.418498	3518.88	0.533947	4.70376e+06	0.836422	0.836124	33.8837	0.939955	1174.08	0.308952
Pakistan	1.11127e+08	0.1315	0.121073	156.68	0.180704	19224.6	0.00862288	2.35554e+08	0.190465	0.175528	106.509	0.189464	6138.29	0.0126261
Palestine	2.04692e+06	0.31934	0.319148	65.306	0.390021	12790.7	0.240291	5.13559e+06	0.447691	0.447366	38.5193	0.522241	5535.89	0.250327
Panama	2.38896e+06	0.750688	0.750464	41.381	0.833157	2664.41	0.91354	4.292e+06	0.608546	0.608274	18.5379	0.61821	1077.03	0.944219
Papua New Guinea	4.10316e+06	0.13227	0.131885	166.864	0.181649	4568.32	0.917932	1.04616e+07	0.067963	0.0672996	131.776	0.063477	3130.2	0.947517
Paraguay	4.04266e+06	0.636581	0.636202	63.7413	0.770789	461.68	0.970272	7.16884e+06	0.448904	0.44845	31.9599	0.522705	898.544	0.956869
Peru	2.16342e+07	0.722644	0.720614	90.5511	0.818275	1052.88	0.993212	3.62708e+07	0.545975	0.543675	41.6951	0.578705	160.048	0.999863
Philippines	6.30085e+07	0.718584	0.712672	98.4088	0.815571	2632.46	0.57273	1.1325e+08	0.463747	0.456566	86.6554	0.535459	1093.51	0.957092
Plurinational State of Bolivia	6.38105e+06	0.347931	0.347332	141.321	0.41832	8660.67	0.275889	1.17971e+07	0.416081	0.415333	50.8804	0.491048	4806.99	0.29927
Poland	3.81726e+07	0.784788	0.781207	176.901	0.863232	700.524	0.943688	3.82385e+07	0.874751	0.872326	87.3564	0.966853	1024.28	0.947621
Portugal	1.01371e+07	0.769822	0.768871	63.313	0.84383	2392.93	0.543531	1.06078e+07	0.817516	0.816843	21.5278	0.924836	1125	0.640253
Principality of Monaco	30413	0.998711	0.998709	58.3717	0.999247	1324.12	0.909179	37863.5	0.998181	0.998179	37.777	0.99974	520.692	0.732173
Puerto Rico	3.61233e+06	0.810769	0.81043	13.8131	0.892446	8097.95	0.277038	3.29435e+06	0.879969	0.87976	14.5415	0.969664	5512.91	0.11069
Qatar	444838	0.807926	0.807884	47.9819	0.890083	2426.29	0.848445	2.97706e+06	0.894821	0.894632	18.8817	0.97354	876.685	0.64072
Republic of Cabo Verde	353808	0.0716494	0.0716162	109.697	0.104809	4466.62	0.895162	559262	0.201768	0.201733	87.4374	0.196756	1099.55	0.696275
Republic of C么te d'Ivoire	1.21981e+07	0.0739386	0.072794	141.813	0.107197	4589.36	0.89182	2.78619e+07	0.0769897	0.075223	90.0968	0.0703709	2717.13	0.654284
Republic of Korea	4.42453e+07	0.858599	0.854447	40.3483	0.932609	4016.86	0.927948	5.15705e+07	0.983105	0.979835	49.4138	0.995055	1749.98	0.974933
Republic of Moldova	4.44734e+06	0.770657	0.770239	216.455	0.845159	1263.29	0.916803	3.59344e+06	0.811679	0.811451	105.916	0.922044	404.934	0.946906
Republic of Nauru	10205.2	0.737586	0.737585	18.7443	0.826211	357.43	0.943688	11024.4	0.434311	0.43431	20.5515	0.509369	355.286	0.97829
Republic of Niue	2307.43	0.763469	0.763468	113.721	0.839648	1829.21	0.942266	1671.67	0.81121	0.81121	38.5139	0.921555	805.032	0.980934
Republic of Palau	15191.9	0.810772	0.81077	20.7357	0.892447	1110.56	0.96649	18096.8	0.818749	0.818748	32.0335	0.925753	1170.16	0.996859
Republic of San Marino	23753.4	0.983704	0.983702	42.6436	0.98622	5293.13	0.917617	32740.1	0.984425	0.984423	17.576	0.995172	2301.51	0.944579
Republic of the Gambia	981601	0.061677	0.0615849	152.338	0.0917828	4005.98	0.921175	2.39415e+06	0.0666362	0.0664844	105.412	0.0617158	1955.67	0.955164
Romania	2.33798e+07	0.775439	0.773245	171.061	0.851188	3174.7	0.962032	1.89386e+07	0.827482	0.826281	101.033	0.937449	1324.38	0.971438
Russian Federation	1.50985e+08	0.844906	0.830739	140.976	0.924837	12708	0.162818	1.44854e+08	0.867939	0.858754	64.0887	0.961701	3165.12	0.130964
Rwanda	7.18939e+06	0.071583	0.0709084	213.158	0.104755	1214.1	0.910579	1.327e+07	0.0827072	0.0818658	77.266	0.0777649	474.69	0.947622
Saint Kitts and Nevis	41473.3	0.754077	0.754073	48.5079	0.835085	2169.92	0.851477	58645.3	0.818756	0.818752	16.0516	0.925754	1624.91	0.710695
Saint Lucia	136569	0.644342	0.644329	77.8984	0.773993	2172.09	0.84906	177512	0.573405	0.573393	63.0452	0.593923	1780.76	0.640728
Saint Vincent and the Grenadines	109502	0.638169	0.638159	77.6466	0.77144	4339.27	0.851456	114075	0.448919	0.448912	69.6408	0.522716	3463.36	0.609643
Samoa	168931	0.644298	0.644282	128.177	0.773966	793.464	0.993573	213640	0.411208	0.411194	117.925	0.488764	351.019	0.996932
Sao Tome and Principe	121281	0.109448	0.109436	148.692	0.15481	6963.21	0.24032	216618	0.190492	0.190478	66.3516	0.189482	2086.96	0.29929
Saudi Arabia	1.58564e+07	0.737584	0.736096	63.5083	0.826211	2592.82	0.902053	3.77042e+07	0.879533	0.877142	57.0075	0.969599	2026.9	0.978237
Senegal	7.63238e+06	0.0614928	0.0607767	152.765	0.0915763	9037.44	0.142013	1.58596e+07	0.065271	0.0642653	95.8979	0.0603413	3905.62	0.10616
Serbia	9.62956e+06	0.786595	0.785692	217.5	0.866124	4911.61	0.929584	8.91951e+06	0.841245	0.84068	175.717	0.945449	3285.99	0.960619
Seychelles	72869.2	0.754069	0.754062	23.6513	0.835082	658.615	0.910577	105431	0.811223	0.811216	19.8498	0.921557	609.97	0.944222
Sierra Leone	4.15166e+06	0.0343818	0.0339923	251.158	0.0525069	16135.9	0.084091	8.86726e+06	0.029391	0.0288287	111.739	0.0307716	5472.3	0.0583176
Singapore	3.0472e+06	0.850296	0.85001	66.7831	0.930145	1741.19	0.96479	5.72729e+06	0.900018	0.899655	27.0233	0.974854	681.306	0.982009
Slovakia	5.28326e+06	0.808965	0.808469	143.717	0.89116	3216.51	0.942869	5.42946e+06	0.869901	0.869557	78.0691	0.962586	1541.41	0.972041
Slovenia	1.97353e+06	0.874467	0.874282	89.7698	0.941721	1953.63	0.971022	2.06965e+06	0.890416	0.890285	40.1017	0.972671	799.501	0.980191
Socialist Republic of Viet Nam	6.82268e+07	0.332146	0.325744	138.427	0.403062	7079.41	0.195015	1.00268e+08	0.44704	0.440682	98.4292	0.521988	5355.34	0.123185
Solomon Islands	339062	0.0890795	0.0890477	164.893	0.126776	11954.7	0.00328233	683564	0.0770764	0.077033	156.313	0.0705074	6406.09	0.00598287
Somalia	7.93872e+06	0.00148981	0.000744904	173.991	0.00190691	3606.98	0.90752	2.16065e+07	0.00274016	0.00137008	100.624	0.00277751	1977.09	0.715664
South Africa	3.70131e+07	0.746077	0.742604	70.7486	0.831001	10134.8	0.0813024	5.68544e+07	0.580732	0.577127	58.9026	0.598306	7600.82	0.0293081
South Sudan	5.87741e+06	0.0334137	0.0328622	164.946	0.050756	1155.51	0.932623	9.67252e+06	0.0124501	0.0118368	124.298	0.0137228	440.261	0.956164
Spain	3.87822e+07	0.795502	0.791863	57.7096	0.871875	3376.73	0.899814	4.55493e+07	0.833435	0.830547	21.8061	0.938866	2209.54	0.731495
Sri Lanka	1.71305e+07	0.732099	0.730491	115.934	0.823842	10566.8	0.194932	2.22701e+07	0.607283	0.605871	89.1871	0.61724	2879.62	0.329481
Sudan	2.00213e+07	0.0890159	0.0871373	200.042	0.126698	2939.23	0.870158	4.3419e+07	0.217718	0.214965	79.9637	0.216229	2178.18	0.640308
Suriname	386716	0.680082	0.680046	82.6012	0.794531	968.99	0.989362	579247	0.447765	0.447728	71.2695	0.522293	160.559	0.996931
Sweden	8.58775e+06	0.955523	0.954718	54.505	0.977977	1452.28	1	1.03735e+07	0.984421	0.983763	8.78341	0.995171	355.665	1
Switzerland	6.86641e+06	1	0.999356	79.4586	1	2485.64	0.573823	8.92281e+06	1	0.999434	17.7145	1	2360.77	0.629466
Syrian Arab Republic	1.27175e+07	0.35069	0.349497	63.2991	0.419609	1186.57	0.94461	1.40304e+07	0.434309	0.43342	91.4869	0.509368	1022.5	0.994242
Taiwan (Province of China)	2.03909e+07	0.81497	0.813056	45.4135	0.893816	7908.64	0.847519	2.36367e+07	0.976439	0.97494	44.5275	0.991786	3130.98	0.324076
Tajikistan	5.369e+06	0.635418	0.634914	170.136	0.769926	2691.55	0.881819	1.01599e+07	0.212211	0.211567	83.8447	0.211794	2095.42	0.722989
Thailand	5.67646e+07	0.706759	0.701433	82.5364	0.807011	10865.2	0.151812	6.66832e+07	0.591345	0.587117	85.4401	0.607045	3707.42	0.131188
The former Yugoslav Republic of Macedonia	1.99231e+06	0.771031	0.770844	182.63	0.845661	9269.2	0.155389	2.17644e+06	0.818552	0.818414	149.356	0.925657	4357.97	0.107736
Timor-Leste	781143	0.0666724	0.0665991	162.675	0.0975919	649.153	0.897813	1.39773e+06	0.0828845	0.0827959	109.104	0.0779597	630.354	0.723138
Togo	3.64669e+06	0.0682185	0.0678764	145.729	0.100059	3176.59	0.851467	8.37093e+06	0.0663326	0.0658018	98.3874	0.0613934	2189.88	0.629476
Tokelau	1594.58	0.728884	0.728884	22.4687	0.8211	1971.96	0.922645	1370.97	0.5917	0.5917	20.957	0.607228	2209.29	0.955297
Tonga	98851.3	0.644317	0.644307	94.2577	0.773979	2098.95	0.849051	106300	0.434324	0.434317	81.1102	0.50938	1613.92	0.716949
Trinidad and Tobago	1.2048e+06	0.777625	0.777512	69.0019	0.85391	3004.94	0.910569	1.39314e+06	0.827659	0.82757	83.6569	0.937597	2058.49	0.716123
Tunisia	8.34946e+06	0.638148	0.637365	55.5081	0.771429	8091.14	0.543533	1.18426e+07	0.582888	0.582137	65.7437	0.599767	1365.6	0.608817
Turkey	5.74729e+07	0.634391	0.628998	74.8184	0.768643	2881.93	0.84603	8.3612e+07	0.61915	0.613848	68.5093	0.625528	1574.37	0.737863
Turkmenistan	3.69924e+06	0.754038	0.753691	66.9883	0.835069	8658.51	0.0643597	5.15837e+06	0.581386	0.581059	70.701	0.598772	3502.03	0.117247
Tuvalu	9512.15	0.319342	0.319341	198.454	0.390024	4399.96	0.940746	12367.1	0.410338	0.410337	46.7692	0.48809	2697.03	0.952644
Uganda	1.72909e+07	0.0257747	0.0241523	138.764	0.0396431	1569.3	0.932725	4.33151e+07	0.0734562	0.0707096	66.6297	0.067164	830.723	0.98128
Ukraine	5.27131e+07	0.805746	0.8008	212.129	0.887408	2041.87	0.977727	4.30778e+07	0.824219	0.821488	142.942	0.93362	490.798	0.983579
United Arab Emirates	1.87088e+06	0.795854	0.795678	37.2837	0.871971	10272	0.151519	9.63115e+06	0.896042	0.895432	19.642	0.973782	3785.32	0.140751
United Kingdom of Great Britain and Northern Ireland	5.72993e+07	0.897945	0.892568	106.499	0.955883	1142.71	0.98846	6.78484e+07	0.908969	0.904666	24.3976	0.977189	361.343	0.98881
United Republic of Tanzania	2.58374e+07	0.0665258	0.0641014	157.941	0.0974165	473.459	0.942871	5.84479e+07	0.0902969	0.0865907	80.0473	0.0839367	588.914	0.97824
United States of America	2.54094e+08	0.948678	0.924836	53.6216	0.976135	1454.48	0.910737	3.32643e+08	0.951857	0.930764	15.0566	0.983644	633.637	0.738007
United States Virgin Islands	106061	0.808985	0.808975	15.2241	0.891162	4629.26	0.870119	85901.9	0.879551	0.879546	21.4288	0.969603	2771.63	0.700376
Uruguay	3.13942e+06	0.754666	0.754372	64.1643	0.835363	6224.83	0.533979	3.40562e+06	0.619743	0.619527	31.3808	0.625718	5218.35	0.151778
Uzbekistan	2.09589e+07	0.680009	0.678043	114.663	0.794487	1442.51	0.896101	3.42329e+07	0.550317	0.548146	94.597	0.582842	1204.37	0.611029
Vanuatu	152227	0.3083	0.308286	152.001	0.38208	5003.44	0.55534	312982	0.100479	0.100459	152.531	0.0917564	2428.91	0.640003
Yemen	1.36345e+07	0.0370587	0.0357794	161.935	0.0556668	9560.36	0.0887733	3.36435e+07	0.096195	0.0940617	76.5438	0.089482	2980.11	0.148056
Zambia	7.93646e+06	0.0925275	0.0917828	140.395	0.130287	9048.2	0.200459	1.95153e+07	0.192967	0.19173	69.8125	0.191223	3232.94	0.302017
Zimbabwe	1.03428e+07	0.318805	0.317834	82.966	0.389725	4411.44	0.543217	1.55954e+07	0.104618	0.103629	96.4473	0.0964653	4430.67	0.157738
DALYs = disability-adjusted life-years. PMP = particulate matter pollution. SDI = socio-demographic index.
