# Supplementary material for: Global, regional, and national burden of particulate matter pollution (1990–2021) and projections to 2042: A comprehensive analysis for the Global Burden of Disease database
Source: Research Square preprint supplement (doi:10.21203/rs.3.rs-7087796/v1), 2025-08-13
Supplement: Supplementary file 8 [file acf3ac79c9f84957ca8ffd5c.xlsx]

## Sheet: Table S5
Table S5: Z-scored AAPC in PMP-attributable burdens by region, 1990–2021
	Trend	Z-scored AAPC in age-standardized rate
		Mortality	DALYs
Andean Latin America	Slow decline	–0.72	–1.21
Central Europe		–0.91	–0.99
Central Latin America		–0.27	–0.31
East Asia		–0.67	–0.95
Eastern Europe		–0.87	–0.81
Southern Latin America		–0.50	–0.41
Australasia	Fluctuating or stable	0.14	0.64
High-income Asia Pacific		–0.34	0.37
Southeast Asia		0.19	–0.01
Caribbean	Significant increase	0.81	1.2
Central Asia		0.83	0.64
Central Sub-Saharan Africa		1.04	0.86
Eastern Sub-Saharan Africa		0.83	0.62
North Africa and Middle East		0.63	0.48
Oceania		1.2	1.41
South Asia		1.05	0.78
Southern Sub-Saharan Africa		1.36	1.32
Western Sub-Saharan Africa		1.01	0.89
High-income North America	Rapid decline	–1.78	–1.46
Tropical Latin America		–1.20	–1.42
Western Europe		–1.85	–1.65
AAPC = average annual percentage change. DALYs = disability-adjusted life-years. PMP = particulate matter pollution.
