# Supplementary material for: Global, regional, and national burden of particulate matter pollution (1990–2021) and projections to 2042: A comprehensive analysis for the Global Burden of Disease database
Source: Research Square preprint supplement (doi:10.21203/rs.3.rs-7087796/v1), 2025-08-13
Supplement: Supplementary file 9 [file d058b480dcb19184af02d530.xlsx]

## Sheet: Table S2
Table S2: PMP-attributable burdens by sex and age, 2021
Age group	Mortality rate (per 100 000), age standardized		DALYs rate (per 100 000), age standardized
	Female (95% UI)	Male (95% UI)	Female (95% UI)	Male (95% UI)
<5	96.39 (70.72–124.35)	118.37 (89.46–151.32)	8652.96 (6358.67–11150.79)	10632.04 (8040.71–13584.15)
5–9	1.48 (0.22–2.48)	1.54 (0.22–2.61)	123.89 (18.38–207.25)	129.43 (18.09–218.90)
10–14	0.99 (0.15–1.64)	0.89 (0.13–1.47)	77.49 (11.53–128.88)	69.87 (10.11–115.70)
15–19	0.86 (0.13–1.45)	0.79 (0.11–1.28)	62.79 (9.29–106.63)	58.55 (8.31–94.50)
20–24	0.87 (0.13–1.46)	0.85 (0.12–1.36)	60.03 (9.29–100.93)	58.48 (8.47–94.44)
25–29	3.28 (2.37–4.12)	4.89 (3.81–5.89)	277.81 (216.14–339.40)	374.78 (303.12–449.75)
30–34	4.76 (3.68–5.81)	9.12 (7.34–10.79)	372.44 (300.19–447.65)	620.88 (511.95–730.17)
35–39	7.62 (6.05–9.22)	14.98 (12.06–17.81)	531.24 (433.61–633.50)	920.63 (760.51–1083.11)
40–44	14.17 (11.44–16.85)	29.22 (23.76–34.46)	853.93 (704.90–1006.03)	1582.36 (1310.89–1870.94)
45–49	25.12 (20.60–29.67)	48.35 (39.51–57.43)	1339.11 (1118.76–1580.95)	2354.31 (1946.95–2788.42)
50–54	44.41 (36.99–52.35)	86.01 (70.82–102.82)	2068.36 (1729.70–2450.67)	3681.51 (3054.24–4387.91)
55–59	80.59 (66.74–95.48)	141.19 (116.87–168.98)	3210.81 (2677.14–3782.53)	5264.20 (4366.37–6259.46)
60–64	137.57 (113.31–161.58)	235.88 (196.22–281.22)	4647.83 (3829.20–5454.88)	7509.56 (6254.39–8884.28)
65–69	235.78 (193.63–277.80)	376.80 (313.81–455.23)	6642.39 (5524.98–7785.45)	10102.36 (8421.10–12135.03)
70–74	397.99 (326.77–469.08)	611.12 (505.98–740.50)	9104.17 (7492.20–10671.98)	13419.50 (11160.37–16120.64)
75–79	654.91 (531.02–773.01)	953.54 (788.82–1157.18)	11834.89 (9778.05–13971.25)	16712.48 (13881.70–20202.14)
80–84	1054.09 (834.76–1262.82)	1471.01 (1205.52–1783.10)	14622.36 (11772.61–17374.47)	19949.32 (16476.57–24174.41)
85–89	1473.09 (1122.26–1803.61)	2421.12 (1964.84–2937.27)	16129.33 (12399.80–19584.33)	25552.85 (20832.05–30889.67)
90–94	1954.97 (1442.39–2450.60)	3070.13 (2448.52–3776.84)	18232.97 (13640.99–22587.18)	27906.51 (22507.67–34152.58)
95+	2354.13 (1640.46–3016.46)	2685.24 (2013.22–3356.60)	20337.78 (14381.77–25890.64)	23192.65 (17735.65–28826.35)
DALYs = disability-adjusted life-years. PMP = particulate matter pollution. UI = uncertainty interval.
