# Supplementary material for: Global, regional, and national burden of particulate matter pollution (1990–2021) and projections to 2042: A comprehensive analysis for the Global Burden of Disease database
Source: Research Square preprint supplement (doi:10.21203/rs.3.rs-7087796/v1), 2025-08-13
Supplement: Supplementary file 10 [file ed435bb70e2e4391cffa3cb1.xlsx]

## Sheet: Table_S1
Table S1: PMP-attributable burdens by country and territory, 1990 and 2021
	Mortality (95% UI)				DALYs (95% UI)
	Rate (per 100 000), age standardized, 1990	Rate (per 100 000), age standardized, 2021	Number (in thousands), all ages, 1990	Number (in thousands), all ages, 2021	Rate (per 100 000), age standardized, 1990	Rate (per 100 000), age standardized, 2021	Number (in thousands), all ages, 1990	Number (in thousands), all ages, 2021
AFG	425.79 (331.09–525.36)	288.53 (226.67–352.95)	33.05 (24.68–41.19)	30.47 (23.82–37.71)	13517.28 (9934.27–16895.39)	7566.53 (6042.23–9207.11)	1556.95 (1054.59–2049.00)	1395.81 (1039.20–1783.67)
AGO	279.33 (211.92–359.03)	136.81 (93.13–186.49)	17.93 (12.06–23.63)	16.76 (11.53–22.68)	9611.48 (6671.43–12389.41)	3662.42 (2569.12–4834.08)	1186.20 (737.23–1642.58)	828.83 (556.04–1156.52)
ALB	213.18 (171.31–249.72)	65.81 (42.75–98.38)	3.91 (3.11–4.66)	2.65 (1.73–3.97)	4992.69 (3866.49–5997.47)	1277.50 (853.22–1842.83)	122.34 (87.50–152.72)	49.11 (32.34–72.85)
AND	32.62 (13.48–56.52)	7.42 (4.03–11.67)	0.02 (0.01–0.03)	0.01 (0.01–0.02)	698.65 (317.79–1164.55)	171.59 (93.44–265.44)	0.37 (0.16–0.63)	0.26 (0.14–0.41)
ARE	181.27 (135.94–232.95)	114.23 (85.20–145.03)	0.70 (0.53–0.89)	1.89 (1.39–2.44)	4233.30 (3210.32–5435.38)	2255.67 (1706.89–2822.61)	29.36 (22.42–37.94)	80.01 (60.57–99.80)
ARG	71.04 (35.82–109.03)	27.34 (14.10–42.29)	21.31 (10.80–32.60)	15.55 (7.96–24.22)	1754.46 (1001.85–2585.35)	659.77 (373.26–964.98)	559.35 (322.50–823.12)	345.95 (193.26–520.37)
ARM	161.24 (98.24–227.11)	98.04 (70.12–129.04)	3.93 (2.42–5.46)	4.16 (2.97–5.48)	4065.90 (2561.52–5702.01)	2137.51 (1586.27–2747.97)	117.24 (74.36–163.97)	85.38 (62.53–111.18)
ASM	27.58 (0.25–91.90)	28.53 (3.57–61.98)	0.01 (0.00–0.02)	0.01 (0.00–0.03)	737.48 (46.04–2278.27)	791.78 (120.93–1628.53)	0.22 (0.02–0.64)	0.37 (0.05–0.78)
ATG	60.68 (16.74–119.05)	41.24 (17.31–67.75)	0.03 (0.01–0.07)	0.04 (0.02–0.06)	1445.49 (469.23–2722.35)	1027.60 (499.12–1614.71)	0.79 (0.26–1.49)	1.01 (0.47–1.60)
AUS	16.58 (0.95–43.78)	8.32 (5.10–11.94)	3.11 (0.15–8.23)	4.25 (2.58–6.15)	343.82 (38.21–864.02)	188.44 (117.30–264.96)	64.41 (6.17–165.79)	82.28 (51.53–117.57)
AUT	65.36 (35.88–99.81)	13.60 (9.78–17.75)	7.98 (4.36–12.24)	2.92 (2.10–3.83)	1307.68 (728.93–1914.05)	292.95 (214.96–376.67)	148.98 (81.93–222.79)	52.83 (38.34–68.26)
AZE	180.65 (95.23–264.64)	100.43 (56.99–149.11)	8.93 (4.92–13.08)	7.94 (4.46–11.81)	5624.37 (3126.38–8347.17)	2427.19 (1509.07–3432.20)	369.06 (197.87–563.02)	213.19 (129.13–304.25)
BDI	337.89 (258.95–419.09)	206.70 (156.88–264.95)	11.14 (7.75–14.04)	11.17 (8.47–14.00)	10593.44 (7731.85–13430.84)	5696.14 (4379.44–7104.28)	615.13 (397.12–815.93)	552.51 (390.36–708.85)
BEL	66.03 (35.52–101.06)	12.04 (8.53–15.82)	10.27 (5.46–15.74)	3.31 (2.29–4.40)	1343.32 (746.41–2012.57)	290.90 (208.13–376.74)	197.04 (109.82–298.25)	64.58 (46.71–84.68)
BEN	263.33 (189.48–322.18)	190.04 (148.18–233.31)	9.24 (6.07–11.89)	12.80 (9.67–16.27)	9115.56 (6192.04–11625.01)	5699.63 (4386.53–7158.59)	580.33 (349.63–781.46)	706.46 (506.54–940.91)
BFA	236.58 (153.84–300.75)	181.71 (136.41–226.36)	18.00 (10.96–24.24)	22.91 (16.18–29.85)	8938.27 (5558.16–11881.75)	5617.53 (4120.00–7132.49)	1208.45 (696.32–1679.28)	1300.39 (870.05–1727.98)
BGD	314.69 (263.60–365.60)	190.91 (154.00–234.90)	222.20 (170.55–268.04)	231.60 (184.11–286.87)	11135.33 (8719.71–13206.55)	5114.68 (4047.16–6317.54)	13042.34 (8941.22–16535.32)	6900.92 (5432.33–8554.05)
BGR	215.36 (135.99–302.64)	76.82 (58.22–110.90)	19.28 (12.19–27.17)	10.83 (8.24–15.68)	4179.89 (2621.78–5814.56)	1624.43 (1242.00–2266.89)	430.50 (271.79–601.52)	212.66 (162.00–301.41)
BHR	317.81 (257.78–368.39)	150.65 (121.40–178.26)	0.39 (0.32–0.45)	0.75 (0.60–0.91)	6495.56 (5311.99–7509.83)	2938.15 (2398.59–3491.32)	13.23 (10.95–15.33)	23.82 (19.08–28.76)
BHS	55.09 (11.35–104.82)	35.36 (13.33–62.62)	0.08 (0.02–0.15)	0.13 (0.05–0.23)	1529.39 (405.22–2717.81)	984.84 (395.39–1692.23)	2.75 (0.83–4.72)	3.83 (1.48–6.60)
BIH	210.29 (182.95–237.12)	90.99 (66.89–122.94)	7.14 (6.25–8.01)	5.75 (4.22–7.81)	4837.92 (4262.87–5436.71)	1941.11 (1462.48–2584.21)	184.66 (162.70–207.37)	115.38 (85.79–155.30)
BLR	155.36 (87.67–222.71)	68.78 (47.90–94.95)	18.88 (10.61–27.00)	11.20 (7.80–15.48)	3305.19 (1939.73–4645.16)	1389.70 (967.71–1875.18)	401.42 (233.88–567.25)	217.78 (151.14–294.83)
BLZ	90.80 (56.62–128.95)	57.91 (31.99–86.69)	0.10 (0.07–0.15)	0.16 (0.09–0.24)	2653.29 (1775.94–3708.80)	1570.01 (924.97–2242.12)	4.29 (2.84–6.05)	4.97 (2.98–7.05)
BMU	29.58 (0.33–76.74)	6.88 (1.33–12.91)	0.02 (0.00–0.04)	0.01 (0.00–0.02)	641.70 (32.23–1574.82)	174.99 (39.78–321.56)	0.38 (0.01–0.95)	0.22 (0.05–0.42)
BOL	230.38 (163.00–300.08)	76.15 (51.40–108.98)	9.02 (5.72–12.30)	6.00 (4.01–8.66)	7320.25 (4621.03–10005.62)	1896.38 (1306.10–2660.34)	474.22 (256.02–679.94)	178.54 (122.40–252.37)
BRA	101.52 (62.33–143.99)	26.45 (15.37–37.50)	85.23 (53.70–118.92)	63.60 (36.87–90.41)	2950.31 (1947.93–4017.49)	707.86 (439.95–969.66)	3273.19 (2216.21–4448.91)	1693.62 (1035.32–2352.53)
BRB	69.55 (22.45–124.10)	46.84 (22.90–72.31)	0.21 (0.06–0.37)	0.23 (0.11–0.36)	1650.46 (699.97–2761.05)	1181.85 (653.50–1778.53)	4.50 (1.69–7.66)	5.28 (2.70–8.02)
BRN	30.45 (2.29–74.75)	15.72 (3.42–29.91)	0.03 (0.00–0.06)	0.04 (0.01–0.08)	685.45 (74.42–1630.39)	409.47 (104.21–753.15)	0.82 (0.13–1.86)	1.44 (0.35–2.68)
BTN	234.44 (180.57–293.65)	102.98 (76.08–130.38)	0.81 (0.59–1.03)	0.57 (0.42–0.73)	8136.60 (6117.88–10295.57)	2652.36 (1932.76–3387.75)	50.34 (34.67–65.81)	15.83 (11.48–20.28)
BWA	221.91 (150.98–297.74)	76.57 (45.61–119.19)	1.33 (0.94–1.78)	0.99 (0.61–1.49)	6246.96 (4357.73–8363.41)	2247.00 (1454.72–3233.50)	64.78 (44.99–87.23)	38.70 (24.73–55.62)
CAF	385.47 (286.17–477.11)	317.43 (233.68–405.23)	6.37 (4.31–8.49)	7.72 (5.33–10.10)	12821.75 (8981.36–16759.71)	9427.06 (6741.52–12143.36)	394.88 (243.49–544.72)	412.20 (269.96–556.18)
CAN	26.14 (8.05–48.20)	4.16 (1.64–7.23)	8.32 (2.54–15.40)	3.26 (1.24–5.74)	544.50 (174.77–980.81)	109.56 (42.42–188.25)	170.90 (52.27–309.39)	71.71 (28.33–127.71)
CHE	49.00 (24.40–78.27)	7.05 (4.56–9.61)	5.46 (2.72–8.77)	1.58 (1.01–2.19)	980.73 (503.90–1513.24)	182.67 (119.16–257.09)	99.72 (50.18–156.15)	31.74 (20.70–44.26)
CHL	103.82 (71.93–134.92)	26.84 (18.39–35.35)	9.34 (6.55–12.08)	6.92 (4.70–9.11)	2282.39 (1640.84–2922.91)	678.31 (491.31–863.62)	237.97 (170.37–302.41)	162.74 (116.51–209.02)
CHN	367.58 (317.05–421.27)	125.13 (97.59–157.87)	2236.94 (1919.88–2568.40)	2273.44 (1771.10–2892.74)	8142.70 (6796.79–9441.41)	2436.88 (1919.69–3069.45)	66320.22 (53455.17–77459.84)	46676.90 (36578.69–59744.05)
CIV	253.52 (197.09–313.51)	195.54 (151.81–251.52)	17.30 (12.03–22.68)	25.10 (18.80–32.17)	8419.04 (6130.25–10720.97)	5807.76 (4447.12–7341.08)	1168.98 (775.11–1571.20)	1337.28 (969.65–1785.96)
CMR	222.48 (164.86–280.35)	186.62 (141.73–246.33)	14.30 (10.12–19.06)	25.24 (18.81–33.43)	7168.01 (5193.74–9352.38)	5199.13 (3919.80–6774.26)	856.03 (560.69–1206.80)	1209.28 (846.62–1659.49)
COD	277.50 (205.68–347.63)	227.51 (166.27–294.86)	58.13 (39.75–75.52)	78.39 (57.31–101.92)	8460.85 (5963.44–10824.07)	5841.77 (4357.63–7465.07)	3465.43 (2114.90–4824.59)	3378.50 (2481.78–4405.20)
COG	310.02 (241.03–386.13)	183.10 (135.30–232.02)	3.39 (2.55–4.31)	4.08 (3.01–5.34)	8361.19 (6343.28–10600.65)	4540.89 (3442.42–5823.12)	152.51 (105.82–202.53)	148.15 (110.78–194.27)
COK	40.48 (2.50–100.81)	14.74 (0.10–36.14)	0.00 (0.00–0.01)	0.00 (0.00–0.01)	1093.27 (165.45–2633.44)	423.94 (22.52–996.76)	0.15 (0.03–0.36)	0.10 (0.00–0.24)
COL	102.17 (71.80–129.78)	25.68 (16.62–37.21)	18.08 (13.06–22.52)	14.29 (9.15–20.80)	2787.69 (2051.52–3477.16)	663.35 (434.83–914.46)	685.69 (498.72–879.51)	348.43 (230.22–479.06)
COM	251.50 (193.80–319.33)	152.95 (117.59–199.12)	0.76 (0.56–1.00)	0.70 (0.54–0.91)	8874.52 (6674.81–11553.52)	4678.50 (3709.35–5879.27)	48.26 (33.28–66.23)	28.35 (22.03–36.19)
CPV	141.80 (111.84–172.63)	117.76 (84.51–149.18)	0.39 (0.30–0.47)	0.49 (0.35–0.62)	4152.15 (3215.48–5088.34)	2732.83 (1993.10–3483.68)	14.27 (10.63–18.06)	11.99 (8.68–15.39)
CRI	65.40 (39.66–87.38)	18.12 (12.33–24.91)	1.14 (0.70–1.52)	1.00 (0.67–1.38)	1603.83 (1030.00–2098.90)	524.32 (363.14–710.53)	34.72 (23.61–45.23)	27.15 (18.75–37.04)
CUB	77.92 (33.96–138.23)	46.15 (23.10–72.92)	7.45 (3.23–13.25)	9.54 (4.76–15.07)	1695.66 (776.67–2928.00)	1043.15 (554.78–1600.75)	168.32 (76.12–292.08)	197.42 (103.76–305.46)
CYP	111.40 (53.56–177.65)	29.19 (21.78–37.30)	0.58 (0.28–0.92)	0.50 (0.37–0.65)	1823.59 (932.71–2807.88)	535.80 (403.30–688.15)	11.72 (6.04–17.89)	10.05 (7.46–12.95)
CZE	129.69 (70.81–192.23)	31.27 (23.51–39.56)	17.31 (9.42–25.69)	7.23 (5.42–9.14)	2766.05 (1586.61–3995.98)	657.95 (508.87–834.82)	362.31 (201.42–529.16)	138.76 (106.46–175.54)
DEU	71.80 (38.30–111.40)	12.87 (9.07–17.03)	94.34 (49.80–146.73)	29.06 (20.29–38.63)	1433.56 (789.11–2158.29)	295.59 (210.02–391.49)	1758.32 (945.70–2675.03)	544.63 (387.86–719.88)
DJI	172.71 (124.49–228.35)	122.58 (81.66–172.00)	0.32 (0.22–0.42)	0.66 (0.44–0.95)	5388.30 (3810.93–7068.33)	3261.49 (2236.27–4580.88)	19.44 (12.58–26.53)	27.05 (18.68–38.16)
DMA	125.45 (80.87–169.98)	62.37 (30.33–96.78)	0.07 (0.05–0.10)	0.05 (0.02–0.07)	2822.54 (1916.40–3748.34)	1692.45 (943.18–2519.37)	1.79 (1.23–2.37)	1.19 (0.62–1.82)
DNK	65.65 (31.88–106.00)	11.54 (7.22–16.13)	5.59 (2.69–9.06)	1.53 (0.95–2.15)	1326.47 (666.06–2120.68)	245.15 (156.95–338.45)	104.07 (51.04–168.35)	27.94 (17.60–38.73)
DOM	113.42 (80.53–144.26)	54.77 (23.43–91.06)	4.58 (3.33–5.80)	5.35 (2.30–8.88)	3367.06 (2456.61–4244.74)	1619.21 (866.45–2518.46)	214.55 (150.35–277.13)	164.52 (88.35–255.17)
DZA	119.66 (85.33–156.54)	84.38 (58.49–112.67)	11.39 (8.15–14.63)	21.60 (14.95–28.90)	2706.06 (1960.60–3446.19)	1740.92 (1262.61–2262.83)	458.03 (317.28–615.98)	585.56 (426.60–755.18)
ECU	112.60 (77.80–143.26)	35.43 (22.43–50.53)	6.21 (4.37–7.93)	5.27 (3.30–7.56)	3018.73 (2170.64–3849.28)	888.69 (583.03–1233.80)	247.94 (174.03–322.07)	142.27 (93.20–198.96)
EGY	316.48 (256.23–377.41)	251.77 (196.73–311.01)	78.91 (62.65–97.18)	115.83 (90.10–144.72)	8020.61 (6368.56–9853.28)	5287.62 (4151.34–6604.02)	3504.15 (2418.73–4582.43)	3313.81 (2585.15–4157.75)
ERI	311.97 (226.21–398.40)	212.33 (152.89–282.04)	5.11 (3.20–6.73)	5.59 (3.87–7.58)	10054.77 (6670.65–13142.62)	5753.23 (4104.96–7672.29)	318.74 (185.20–434.45)	253.27 (168.02–352.96)
ESP	42.53 (19.35–70.87)	8.17 (5.36–11.24)	22.38 (10.12–37.50)	9.93 (6.44–13.87)	889.61 (426.97–1407.78)	213.19 (138.76–295.55)	448.13 (203.89–726.30)	200.54 (131.26–279.63)
EST	97.36 (41.47–158.44)	7.26 (2.27–13.88)	1.88 (0.79–3.07)	0.23 (0.07–0.44)	1983.32 (892.89–3149.70)	166.30 (57.42–303.44)	38.23 (16.50–61.62)	4.36 (1.47–7.97)
ETH	307.88 (208.93–384.92)	139.80 (109.01–168.49)	109.13 (72.08–141.59)	76.00 (60.38–92.95)	11536.51 (7676.43–14721.99)	4466.33 (3654.84–5364.56)	7342.91 (4625.73–9751.81)	4085.79 (3219.50–5106.99)
FIN	25.95 (4.77–52.82)	2.88 (0.43–6.07)	1.85 (0.33–3.79)	0.44 (0.06–0.93)	547.04 (110.57–1064.28)	69.37 (12.85–141.04)	37.63 (6.97–74.79)	8.21 (1.20–17.33)
FJI	231.27 (153.09–304.67)	128.92 (48.72–213.74)	0.74 (0.48–0.97)	0.82 (0.31–1.38)	5966.24 (4014.03–7811.90)	3247.26 (1336.98–5256.35)	26.15 (17.94–34.42)	25.36 (10.43–41.51)
FRA	35.97 (17.48–58.08)	7.67 (5.24–10.59)	31.28 (15.07–50.63)	13.40 (9.06–18.55)	716.73 (358.34–1132.33)	187.05 (127.77–252.48)	571.62 (280.63–915.06)	245.60 (168.91–330.66)
FSM	335.14 (264.56–409.42)	178.41 (119.81–256.44)	0.16 (0.12–0.20)	0.11 (0.07–0.16)	8809.91 (6832.00–10886.81)	4509.39 (2992.34–6491.53)	5.74 (4.20–7.44)	3.50 (2.30–5.09)
GAB	145.17 (89.45–209.27)	104.18 (66.44–151.51)	0.88 (0.57–1.23)	0.93 (0.59–1.38)	4077.62 (2634.66–5677.07)	2651.77 (1752.01–3876.54)	36.26 (22.94–51.12)	32.44 (21.48–47.59)
GBR	65.30 (32.06–104.53)	11.30 (7.42–15.50)	61.02 (29.67–98.02)	16.55 (10.76–22.84)	1349.67 (684.31–2115.21)	278.50 (190.01–373.51)	1169.98 (573.63–1849.87)	333.00 (220.75–451.15)
GEO	152.61 (74.06–233.00)	69.09 (43.52–98.10)	8.54 (4.14–13.14)	4.34 (2.72–6.16)	3910.46 (2021.67–5799.45)	1616.16 (1054.85–2214.43)	218.06 (110.36–325.64)	90.69 (57.88–125.62)
GHA	258.50 (203.39–321.49)	187.21 (142.02–235.51)	20.65 (15.52–25.90)	29.39 (22.42–36.73)	7967.95 (6133.55–9914.50)	5018.88 (3938.21–6249.64)	1143.19 (821.03–1501.12)	1189.05 (913.16–1526.41)
GIN	276.75 (196.35–351.97)	229.76 (173.52–296.17)	15.34 (9.77–20.48)	15.87 (11.40–20.84)	11020.50 (6944.29–14782.67)	6777.68 (5010.60–8888.47)	988.05 (587.17–1389.58)	795.58 (544.48–1093.36)
GMB	264.18 (197.81–330.27)	246.02 (184.34–304.79)	1.50 (1.06–1.91)	2.52 (1.91–3.14)	8630.56 (6251.88–11007.34)	6494.15 (4965.68–7997.85)	94.51 (64.00–125.09)	106.56 (82.58–133.79)
GNB	374.49 (283.13–470.05)	296.04 (229.62–361.61)	2.26 (1.59–2.95)	2.28 (1.73–2.83)	12501.57 (9071.06–16290.10)	8039.92 (6189.70–9800.33)	136.37 (90.98–182.24)	111.23 (83.51–140.78)
GNQ	324.00 (238.04–409.78)	112.91 (64.87–174.50)	0.84 (0.57–1.12)	0.54 (0.32–0.85)	10284.84 (7254.22–13539.76)	2912.21 (1785.48–4491.61)	47.56 (30.35–66.70)	23.00 (14.01–36.01)
GRC	76.61 (43.19–117.28)	25.42 (19.64–31.76)	10.96 (6.14–16.80)	7.56 (5.76–9.50)	1509.02 (865.97–2235.38)	579.31 (454.53–707.25)	212.76 (120.15–320.10)	132.55 (103.04–164.58)
GRD	124.80 (74.63–184.28)	67.84 (33.24–108.50)	0.10 (0.06–0.15)	0.07 (0.03–0.11)	3231.16 (1989.90–4600.69)	1718.42 (944.32–2606.98)	2.54 (1.62–3.61)	1.82 (0.96–2.77)
GRL	29.47 (1.76–77.56)	9.18 (0.53–23.58)	0.01 (0.00–0.02)	0.01 (0.00–0.01)	710.44 (91.13–1778.44)	225.19 (25.90–553.05)	0.27 (0.04–0.63)	0.15 (0.01–0.37)
GTM	209.97 (142.60–263.95)	88.24 (58.33–116.40)	9.33 (5.92–11.97)	8.76 (5.76–11.62)	6242.90 (4013.53–7950.27)	2377.93 (1595.36–3196.73)	548.70 (340.93–722.46)	281.83 (188.11–383.26)
GUM	30.05 (0.38–79.35)	18.80 (9.41–28.27)	0.02 (0.00–0.05)	0.04 (0.02–0.06)	706.38 (51.30–1768.31)	649.22 (339.04–964.96)	0.60 (0.07–1.47)	1.27 (0.67–1.88)
GUY	178.78 (110.18–264.59)	96.87 (50.72–150.19)	0.73 (0.48–1.03)	0.55 (0.29–0.85)	5054.35 (3296.70–6969.55)	2722.75 (1497.75–4029.34)	30.20 (20.48–40.59)	18.04 (10.02–26.69)
HND	151.01 (124.89–176.48)	148.39 (114.94–185.08)	3.64 (2.91–4.36)	7.90 (6.14–9.91)	4311.16 (3487.40–5135.06)	3252.03 (2569.68–3978.34)	176.29 (125.99–226.29)	212.99 (166.29–262.46)
HRV	129.78 (74.52–190.92)	38.99 (29.97–49.92)	6.74 (3.84–9.93)	3.80 (2.92–4.87)	2562.92 (1519.99–3701.68)	789.80 (605.47–990.29)	140.57 (81.67–204.47)	68.90 (52.82–86.79)
HTI	373.01 (305.20–444.83)	269.25 (205.42–346.11)	13.45 (10.52–16.67)	17.65 (13.20–22.59)	10946.56 (8575.80–13522.05)	7241.07 (5504.49–9123.74)	659.99 (451.07–860.41)	687.55 (509.70–868.15)
HUN	137.87 (78.25–208.97)	40.97 (30.16–61.93)	18.58 (10.44–28.38)	8.56 (6.29–12.91)	3156.98 (1886.14–4649.67)	917.27 (681.75–1326.33)	419.46 (245.57–630.97)	172.64 (127.74–251.68)
IDN	203.82 (162.16–240.79)	115.69 (81.82–154.07)	195.68 (158.62–230.43)	218.09 (154.06–293.11)	6156.45 (5028.97–7228.74)	2830.28 (2096.15–3669.67)	8458.99 (6716.93–10069.28)	6522.73 (4799.00–8578.96)
IND	257.67 (215.35–296.11)	191.35 (161.02–220.14)	1308.97 (1067.72–1518.28)	1995.56 (1679.99–2304.83)	8748.77 (7063.36–10170.82)	5349.47 (4503.74–6173.93)	67348.08 (50893.60–81004.72)	60941.69 (51445.18–70020.27)
IRL	57.93 (23.82–99.59)	7.12 (3.75–11.01)	2.28 (0.94–3.91)	0.60 (0.31–0.92)	1135.22 (469.11–1909.59)	154.89 (83.41–235.12)	45.00 (18.50–76.06)	11.69 (6.25–17.77)
IRN	139.20 (112.55–163.62)	74.16 (59.84–87.38)	33.34 (27.45–39.12)	49.57 (40.09–58.24)	3663.56 (3047.33–4296.81)	1612.37 (1335.78–1864.42)	1455.22 (1179.81–1780.14)	1200.85 (994.68–1393.25)
IRQ	184.23 (141.31–233.04)	151.39 (112.44–193.01)	17.64 (13.71–21.61)	28.98 (21.29–37.64)	5279.32 (4101.33–6440.01)	3509.68 (2639.74–4449.24)	770.70 (579.66–990.23)	880.91 (664.00–1127.94)
ISL	15.53 (1.33–34.88)	2.86 (0.57–6.19)	0.05 (0.00–0.11)	0.02 (0.00–0.04)	318.67 (45.65–708.49)	65.56 (15.23–135.76)	0.91 (0.12–2.03)	0.37 (0.08–0.78)
ISR	70.40 (41.30–103.32)	19.30 (15.22–23.34)	3.20 (1.88–4.67)	2.65 (2.07–3.22)	1448.91 (878.83–2038.05)	438.99 (351.35–538.45)	68.91 (41.90–96.66)	54.33 (43.82–66.32)
ITA	64.10 (38.15–92.82)	15.73 (11.97–19.59)	55.54 (32.74–80.64)	29.42 (22.06–37.15)	1331.71 (842.48–1845.47)	334.70 (263.16–414.51)	1090.15 (659.30–1542.68)	490.88 (379.57–611.86)
JAM	93.56 (66.35–119.00)	45.06 (27.13–65.72)	1.80 (1.29–2.28)	1.43 (0.85–2.10)	2551.36 (1876.04–3218.93)	1224.86 (760.16–1741.83)	52.82 (39.18–66.93)	34.66 (21.63–49.61)
JOR	99.33 (76.54–123.20)	61.66 (46.45–78.65)	1.37 (1.05–1.71)	3.57 (2.65–4.59)	2578.72 (2032.79–3173.15)	1586.54 (1193.47–1999.73)	61.15 (43.09–81.87)	124.11 (92.24–157.37)
JPN	25.27 (5.43–53.59)	9.91 (5.41–14.85)	38.77 (8.23–82.25)	49.34 (26.19–75.32)	513.07 (122.05–1052.14)	268.15 (155.31–387.92)	810.58 (180.18–1683.07)	931.23 (527.74–1373.17)
KAZ	129.37 (58.65–213.95)	91.16 (64.96–121.81)	14.95 (6.73–24.80)	12.94 (9.26–17.21)	3288.15 (1626.48–5341.97)	1862.89 (1347.72–2425.57)	446.35 (230.69–733.15)	312.38 (226.70–405.44)
KEN	153.69 (104.95–196.30)	146.26 (107.49–185.07)	20.15 (13.65–26.00)	29.85 (22.87–36.86)	5033.86 (3527.06–6393.84)	3862.44 (3009.31–4680.96)	1260.24 (834.38–1697.89)	1218.04 (954.21–1479.98)
KGZ	234.35 (171.98–295.56)	135.59 (103.25–168.29)	6.98 (5.00–9.01)	5.38 (4.10–6.69)	6329.06 (4558.95–8361.70)	3016.51 (2321.13–3711.22)	247.28 (163.75–344.19)	148.87 (114.45–184.27)
KHM	337.67 (246.45–412.35)	217.45 (168.30–269.66)	22.00 (13.58–29.42)	21.82 (16.76–27.54)	11656.93 (7523.90–15230.71)	5364.64 (4188.91–6821.79)	1340.49 (715.32–1890.02)	687.81 (520.03–895.57)
KIR	325.78 (265.00–388.61)	219.05 (170.88–279.63)	0.12 (0.10–0.15)	0.14 (0.10–0.18)	9401.90 (7679.49–11314.50)	5832.43 (4465.12–7612.48)	5.35 (4.08–6.61)	4.92 (3.73–6.53)
KNA	55.26 (15.10–103.97)	17.50 (6.77–29.54)	0.02 (0.01–0.04)	0.01 (0.00–0.02)	1328.47 (426.53–2397.80)	459.92 (187.21–757.13)	0.50 (0.17–0.89)	0.28 (0.11–0.47)
KOR	82.55 (37.21–136.62)	28.13 (19.31–36.92)	17.85 (8.00–29.42)	25.48 (17.52–33.52)	1753.87 (831.66–2815.89)	681.66 (502.93–862.98)	491.37 (237.27–781.72)	603.46 (440.10–762.88)
KWT	115.47 (92.51–136.27)	70.95 (52.33–91.77)	0.63 (0.51–0.75)	1.76 (1.32–2.28)	2907.38 (2386.02–3407.40)	1851.82 (1425.80–2301.71)	23.73 (18.72–28.11)	61.20 (46.80–76.22)
LAO	437.42 (345.15–539.39)	228.68 (157.34–291.54)	11.72 (8.29–15.43)	9.17 (6.40–11.80)	14553.57 (10475.42–19003.73)	5834.81 (4130.73–7552.19)	648.67 (388.42–901.45)	313.53 (224.65–411.59)
LBN	81.82 (54.62–116.06)	43.91 (28.94–61.16)	1.61 (1.09–2.26)	2.85 (1.86–3.98)	2087.40 (1436.57–2908.19)	1102.44 (739.54–1483.87)	51.89 (35.76–73.22)	65.82 (43.90–89.53)
LBR	272.78 (202.51–339.91)	204.63 (158.63–265.33)	5.53 (3.63–7.40)	4.59 (3.43–6.03)	10621.59 (7124.76–14129.21)	5723.55 (4363.08–7407.31)	367.65 (213.98–515.30)	219.24 (160.55–297.25)
LBY	89.40 (65.21–117.95)	98.89 (71.64–134.04)	1.80 (1.36–2.37)	4.46 (3.21–6.11)	2407.42 (1822.66–3111.88)	2485.80 (1851.23–3297.70)	70.59 (51.61–92.33)	132.05 (98.39–176.81)
LCA	137.29 (79.51–199.11)	50.79 (24.74–79.34)	0.11 (0.06–0.15)	0.11 (0.05–0.17)	3055.63 (1873.84–4343.57)	1409.13 (774.78–2061.21)	2.96 (1.91–4.18)	2.88 (1.51–4.31)
LKA	229.47 (197.28–260.00)	83.94 (45.45–139.94)	19.86 (17.04–22.56)	19.86 (10.70–33.07)	5158.56 (4451.35–5860.40)	1946.47 (1190.80–2980.02)	578.45 (497.98–661.61)	492.07 (298.63–759.71)
LSO	201.85 (150.25–254.56)	238.48 (175.85–308.26)	2.04 (1.48–2.54)	2.45 (1.76–3.19)	6484.83 (4663.22–8102.65)	7007.01 (5126.66–9041.75)	100.42 (67.88–131.66)	95.09 (68.42–123.18)
LTU	116.70 (60.69–175.65)	26.14 (16.21–36.94)	5.11 (2.65–7.71)	1.73 (1.07–2.45)	2391.26 (1294.70–3574.95)	530.82 (331.44–739.76)	103.69 (55.37–155.59)	30.19 (18.64–42.50)
LUX	56.01 (25.44–90.72)	7.40 (4.28–10.63)	0.30 (0.13–0.48)	0.09 (0.05–0.13)	1105.28 (514.30–1767.25)	168.97 (102.94–242.90)	5.75 (2.62–9.23)	1.75 (1.04–2.50)
LVA	160.07 (92.07–226.98)	34.78 (23.24–50.71)	5.52 (3.16–7.84)	1.57 (1.05–2.30)	3310.80 (1960.94–4672.41)	738.84 (499.21–1044.84)	112.93 (65.79–160.15)	28.66 (19.26–41.26)
MAR	144.64 (111.28–178.39)	94.37 (66.63–121.18)	21.99 (17.08–27.51)	27.80 (19.78–36.09)	4175.52 (3208.79–5265.34)	2227.92 (1607.23–2858.26)	903.87 (649.12–1204.38)	741.59 (531.36–958.62)
MCO	22.69 (3.95–45.80)	12.58 (6.48–19.74)	0.02 (0.00–0.04)	0.01 (0.01–0.02)	470.86 (90.38–916.13)	283.60 (153.69–432.76)	0.31 (0.05–0.62)	0.26 (0.13–0.40)
MDA	272.74 (216.57–323.64)	64.09 (41.74–89.94)	9.63 (7.63–11.41)	3.81 (2.47–5.36)	5826.68 (4652.50–6942.27)	1486.70 (981.94–2053.75)	235.40 (187.08–279.74)	82.70 (54.09–115.20)
MDG	302.70 (236.10–358.82)	247.94 (188.33–311.29)	21.08 (14.69–26.02)	27.60 (20.95–34.31)	9626.97 (6853.75–11745.28)	6804.67 (5256.83–8379.48)	1180.44 (758.69–1547.02)	1289.16 (972.53–1618.96)
MDV	260.86 (198.44–310.30)	27.41 (15.72–42.19)	0.25 (0.20–0.30)	0.08 (0.04–0.12)	7227.05 (5625.44–8524.82)	673.06 (410.13–1001.70)	12.42 (9.20–15.76)	2.28 (1.38–3.38)
MEX	102.28 (68.89–132.52)	41.60 (28.74–58.65)	43.55 (30.82–55.73)	48.04 (33.32–67.96)	2766.97 (1979.79–3546.84)	1068.20 (770.55–1466.27)	1843.88 (1279.52–2418.77)	1304.39 (933.74–1796.20)
MHL	234.53 (170.39–313.81)	182.75 (126.53–262.10)	0.04 (0.03–0.05)	0.05 (0.03–0.08)	5984.82 (4394.81–7979.59)	4745.10 (3181.71–6891.88)	1.40 (0.99–1.93)	1.86 (1.23–2.75)
MKD	221.82 (159.10–274.64)	132.59 (101.37–170.70)	3.64 (2.61–4.50)	3.25 (2.45–4.25)	5156.02 (3777.15–6267.08)	2391.46 (1876.91–3039.94)	91.01 (66.70–110.82)	68.13 (52.25–87.38)
MLI	248.92 (195.49–297.92)	186.55 (146.86–229.92)	17.61 (13.32–21.67)	26.23 (20.23–32.43)	9436.88 (7239.64–11467.57)	6294.19 (4976.15–7695.84)	1202.72 (877.28–1503.66)	1680.56 (1235.34–2166.14)
MLT	64.82 (29.91–101.31)	16.66 (11.97–21.95)	0.26 (0.12–0.41)	0.18 (0.13–0.24)	1310.64 (648.11–1992.41)	391.82 (282.34–518.36)	5.31 (2.53–8.17)	3.52 (2.55–4.63)
MMR	430.50 (344.49–524.73)	241.86 (185.46–303.41)	101.13 (76.30–124.95)	100.43 (76.01–127.28)	13430.95 (9799.79–16871.69)	6029.14 (4725.27–7458.18)	4508.09 (2901.50–6025.71)	2882.18 (2235.52–3592.83)
MNE	126.21 (75.02–177.64)	95.87 (66.45–160.64)	0.73 (0.44–1.03)	0.82 (0.57–1.38)	2938.53 (1935.30–4009.61)	1762.08 (1254.70–2884.59)	17.53 (11.44–24.05)	16.06 (11.36–26.50)
MNG	305.84 (250.83–366.09)	130.20 (92.09–173.79)	3.67 (2.73–4.61)	2.36 (1.71–3.14)	8883.35 (6455.19–11208.98)	2949.22 (2148.69–3870.18)	169.79 (91.32–238.01)	71.07 (50.62–92.89)
MNP	36.09 (0.55–96.66)	33.68 (16.67–52.75)	0.01 (0.00–0.01)	0.01 (0.01–0.02)	899.21 (67.39–2312.22)	851.10 (437.74–1309.64)	0.21 (0.03–0.53)	0.44 (0.22–0.68)
MOZ	240.81 (181.44–295.24)	218.99 (166.19–276.45)	23.36 (16.32–30.55)	28.52 (21.35–35.77)	8832.90 (6267.40–11495.79)	6324.60 (4886.58–7820.42)	1516.49 (995.66–2080.90)	1439.12 (1045.23–1840.96)
MRT	267.40 (208.47–327.55)	170.03 (129.83–215.43)	3.37 (2.56–4.16)	3.68 (2.85–4.65)	8092.10 (6170.99–9978.29)	4416.75 (3479.07–5526.86)	172.17 (126.43–217.24)	144.22 (111.18–178.66)
MUS	54.13 (25.09–84.18)	24.55 (9.30–42.37)	0.35 (0.17–0.54)	0.42 (0.15–0.73)	1372.26 (737.74–2119.71)	697.65 (283.47–1164.97)	10.69 (5.71–16.64)	11.70 (4.50–20.48)
MWI	247.52 (176.43–309.14)	200.68 (155.99–246.83)	17.59 (11.15–23.17)	15.88 (12.06–19.91)	9029.87 (5921.51–11592.26)	5620.30 (4362.75–6972.54)	1201.52 (708.05–1649.41)	735.61 (542.53–950.34)
MYS	116.64 (58.63–176.38)	61.44 (41.89–82.63)	10.36 (5.45–15.39)	15.24 (10.46–20.44)	2916.20 (1578.38–4243.80)	1449.76 (1038.48–1913.35)	319.98 (181.10–453.66)	404.53 (288.02–532.45)
NAM	227.21 (158.77–295.26)	122.37 (71.59–190.79)	1.55 (1.09–1.98)	1.49 (0.88–2.32)	6316.22 (4517.67–8059.92)	3175.88 (1959.76–4853.47)	72.29 (50.22–93.12)	52.30 (32.56–81.24)
NER	283.70 (179.80–364.60)	195.95 (143.60–253.83)	20.25 (9.72–29.23)	24.62 (16.35–33.26)	12059.50 (6230.26–16949.69)	5952.05 (4191.27–7847.32)	1544.17 (681.35–2287.64)	1536.92 (978.42–2118.01)
NGA	244.74 (184.90–298.52)	156.65 (122.16–190.80)	177.45 (119.57–226.83)	206.01 (156.87–259.21)	9455.13 (6393.48–12142.24)	5371.20 (4145.15–6714.04)	11516.99 (6906.39–15471.08)	12797.07 (9361.25–16639.38)
NIC	107.72 (87.73–123.77)	57.12 (43.72–71.64)	2.39 (1.84–2.90)	2.48 (1.91–3.11)	3548.91 (2826.68–4232.57)	1536.05 (1207.76–1926.80)	136.80 (93.90–177.00)	78.30 (61.84–98.46)
NIU	111.08 (46.14–179.51)	32.43 (4.39–68.10)	0.00 (0.00–0.00)	0.00 (0.00–0.00)	2760.72 (1212.22–4393.42)	955.40 (215.14–1925.01)	0.06 (0.03–0.10)	0.02 (0.00–0.04)
NLD	63.81 (34.07–97.07)	13.26 (9.53–17.29)	12.92 (6.88–19.75)	5.14 (3.69–6.76)	1338.06 (735.04–1993.34)	288.36 (209.88–373.47)	257.86 (139.17–388.08)	96.58 (69.78–125.69)
NOR	32.73 (10.52–58.42)	3.94 (1.55–6.89)	2.42 (0.77–4.34)	0.46 (0.17–0.82)	675.40 (229.44–1177.90)	89.00 (38.16–151.10)	44.71 (14.56–79.13)	8.67 (3.45–15.04)
NPL	331.91 (261.47–406.50)	231.47 (189.75–282.80)	42.07 (30.66–52.87)	46.56 (38.06–57.04)	11355.85 (8349.27–14177.73)	5726.96 (4707.00–6845.63)	2486.50 (1631.82–3269.98)	1379.48 (1121.46–1668.09)
NRU	43.20 (0.53–150.58)	42.79 (6.59–92.99)	0.00 (0.00–0.01)	0.00 (0.00–0.00)	1211.25 (64.65–3962.00)	1173.51 (198.52–2596.77)	0.08 (0.01–0.25)	0.08 (0.02–0.18)
NZL	15.63 (0.66–45.54)	6.80 (2.95–11.08)	0.60 (0.02–1.75)	0.61 (0.26–1.00)	339.14 (35.10–937.19)	156.90 (71.88–250.06)	12.83 (1.16–35.88)	12.37 (5.37–19.99)
OMN	184.61 (128.46–247.39)	109.53 (80.26–138.50)	1.29 (0.91–1.70)	1.59 (1.17–2.05)	4663.91 (3335.29–6100.75)	2383.54 (1798.88–3020.87)	52.24 (36.94–69.43)	51.44 (38.95–65.12)
PAK	233.18 (192.54–271.58)	206.49 (170.47–252.71)	174.11 (142.32–205.80)	250.89 (210.16–301.85)	8052.58 (6606.84–9558.26)	6278.18 (5311.62–7405.54)	9624.37 (7249.11–11919.09)	11323.04 (9263.35–13555.53)
PAN	66.99 (40.73–90.09)	17.69 (9.97–26.73)	0.99 (0.61–1.32)	0.80 (0.44–1.21)	1751.87 (1135.32–2303.86)	521.37 (313.94–790.88)	31.63 (21.22–41.64)	22.35 (13.39–33.87)
PER	133.58 (91.86–170.22)	45.03 (28.28–63.76)	19.59 (13.11–25.14)	15.12 (9.47–21.44)	4569.19 (3047.50–5908.34)	1180.40 (808.86–1659.97)	966.32 (585.83–1304.82)	398.82 (271.83–559.67)
PHL	213.40 (172.15–252.30)	136.82 (101.14–175.02)	62.01 (48.18–74.47)	98.14 (73.28–125.52)	5864.10 (4595.82–7031.84)	3541.40 (2726.98–4450.99)	2891.69 (2037.92–3624.01)	3077.14 (2367.18–3832.24)
PLW	36.02 (0.94–93.49)	33.09 (3.71–68.14)	0.00 (0.00–0.01)	0.01 (0.00–0.01)	974.74 (64.13–2363.41)	879.88 (140.16–1763.23)	0.11 (0.01–0.26)	0.19 (0.02–0.37)
PNG	375.86 (291.86–473.10)	302.69 (230.47–381.61)	6.85 (5.13–8.76)	13.79 (10.45–17.46)	10482.18 (8055.44–13322.15)	7890.02 (6079.44–9805.55)	332.27 (212.81–442.11)	576.74 (443.95–732.30)
POL	166.53 (112.72–215.88)	43.76 (33.77–55.86)	67.53 (45.54–87.83)	33.40 (25.68–42.67)	3726.38 (2608.63–4769.77)	965.51 (771.43–1205.38)	1533.34 (1064.08–1983.30)	669.17 (531.48–841.46)
PRI	14.88 (0.33–45.35)	5.99 (1.67–10.52)	0.50 (0.01–1.52)	0.48 (0.12–0.85)	373.45 (22.37–1025.67)	195.28 (59.02–347.43)	12.91 (0.72–36.00)	11.70 (2.98–21.31)
PRK	312.43 (249.94–383.02)	247.15 (199.46–300.47)	39.18 (31.04–49.02)	72.21 (57.77–87.87)	7028.53 (5564.95–8809.19)	5410.71 (4332.05–6625.60)	1146.49 (875.36–1475.31)	1677.31 (1336.47–2041.58)
PRT	51.66 (21.03–87.25)	7.65 (4.27–11.57)	6.42 (2.57–10.88)	2.28 (1.24–3.47)	1021.15 (448.53–1650.12)	183.93 (104.27–278.40)	128.06 (53.61–212.29)	42.95 (24.23–65.33)
PRY	107.39 (71.16–137.38)	41.70 (16.28–71.58)	2.58 (1.79–3.23)	2.29 (0.90–3.94)	2934.27 (2089.63–3709.75)	1068.69 (467.87–1728.13)	98.09 (70.45–128.04)	62.85 (27.54–101.94)
PSE	153.49 (110.31–199.30)	102.89 (73.50–131.04)	1.34 (0.96–1.71)	1.98 (1.43–2.53)	3457.49 (2516.14–4440.50)	2175.54 (1621.26–2747.36)	48.98 (33.51–65.04)	57.78 (43.85–73.58)
QAT	296.19 (240.44–354.10)	108.69 (79.87–136.71)	0.21 (0.17–0.26)	0.56 (0.41–0.74)	5899.72 (4790.78–7043.87)	2272.76 (1714.69–2829.33)	8.14 (6.48–9.88)	23.97 (17.86–30.53)
ROU	176.34 (103.90–249.26)	48.37 (35.49–66.69)	39.99 (23.46–56.56)	19.13 (13.95–26.57)	3929.86 (2425.03–5565.15)	1067.43 (788.20–1437.14)	936.59 (564.10–1327.79)	370.38 (275.93–502.18)
RUS	136.69 (67.60–207.70)	38.85 (23.58–59.39)	212.85 (104.43–323.56)	92.83 (56.19–142.13)	2924.94 (1546.01–4334.22)	839.00 (511.86–1255.56)	4793.33 (2464.51–7183.74)	1918.42 (1156.55–2891.89)
RWA	369.93 (281.88–456.66)	175.86 (131.81–226.51)	15.32 (10.18–20.21)	10.25 (7.43–13.10)	12105.49 (8332.28–15730.21)	4610.00 (3397.23–5802.77)	913.63 (543.64–1267.85)	420.01 (301.42–530.37)
SAU	170.29 (125.68–224.13)	135.62 (105.69–167.38)	10.07 (7.47–13.17)	21.49 (15.99–27.50)	4309.48 (3176.90–5559.98)	3177.46 (2460.09–3958.21)	411.13 (291.98–544.18)	764.23 (563.39–982.45)
SDN	333.14 (269.10–401.24)	189.38 (142.15–246.80)	40.05 (29.99–49.59)	34.72 (25.73–45.97)	10326.81 (7905.40–12722.49)	4748.13 (3558.76–6279.46)	2115.62 (1391.80–2820.14)	1250.30 (900.19–1665.43)
SEN	241.57 (194.50–288.48)	196.47 (151.52–244.53)	11.66 (8.72–14.41)	15.21 (11.86–18.69)	7923.49 (6093.58–9645.29)	5280.08 (4146.31–6435.17)	689.77 (475.14–887.70)	619.41 (473.99–769.42)
SGP	107.49 (46.85–170.31)	18.80 (9.51–28.75)	2.04 (0.88–3.20)	1.55 (0.78–2.37)	2417.38 (1124.66–3728.21)	469.73 (259.71–686.85)	53.06 (24.83–81.53)	39.02 (21.67–57.03)
SLB	435.27 (333.35–547.96)	360.85 (285.77–459.42)	0.56 (0.39–0.73)	1.07 (0.82–1.39)	11105.77 (8038.23–14428.10)	8813.39 (6860.11–11307.05)	24.00 (15.93–32.92)	36.61 (27.09–47.20)
SLE	295.57 (221.12–367.82)	226.43 (172.32–286.49)	10.43 (6.92–13.82)	9.91 (7.36–12.77)	11202.12 (7472.92–14873.24)	6610.13 (4976.80–8442.11)	669.91 (408.67–933.85)	485.24 (346.17–641.77)
SLV	121.14 (98.01–142.40)	45.53 (28.70–62.69)	4.15 (3.30–4.94)	3.02 (1.90–4.15)	3551.88 (2817.61–4236.39)	1165.20 (772.53–1594.64)	167.54 (122.87–211.33)	72.62 (47.97–99.43)
SMR	27.62 (11.09–47.28)	5.92 (3.04–9.87)	0.01 (0.00–0.02)	0.01 (0.00–0.01)	570.43 (248.11–941.31)	157.55 (83.49–260.24)	0.19 (0.08–0.32)	0.11 (0.06–0.19)
SOM	308.09 (218.68–396.02)	226.91 (164.76–293.69)	13.81 (9.01–19.08)	21.74 (14.75–29.01)	10546.16 (7282.26–14171.53)	7081.22 (5114.04–9224.97)	949.05 (574.22–1365.74)	1384.13 (886.76–1874.38)
SRB	252.55 (160.92–334.48)	91.52 (68.34–124.08)	20.94 (13.35–27.65)	15.67 (11.67–21.27)	5087.71 (3503.62–6568.19)	1827.93 (1398.64–2416.05)	472.97 (316.10–612.85)	293.09 (222.27–389.44)
SSD	239.56 (168.25–314.36)	217.38 (159.87–288.44)	9.69 (6.76–13.01)	12.02 (8.24–16.33)	8583.53 (6081.85–11536.42)	7361.69 (5193.46–9853.66)	595.66 (378.50–847.69)	735.19 (489.02–1019.07)
STP	232.50 (176.05–285.25)	151.69 (117.23–188.01)	0.18 (0.13–0.23)	0.14 (0.11–0.18)	7018.73 (4938.87–8981.31)	3583.27 (2775.98–4415.41)	8.45 (5.39–11.33)	4.52 (3.39–5.70)
SUR	125.00 (73.36–184.98)	69.71 (37.93–110.16)	0.32 (0.19–0.47)	0.41 (0.22–0.65)	3650.98 (2278.61–5163.30)	2130.22 (1290.31–3064.41)	11.37 (7.31–15.70)	12.62 (7.50–18.56)
SVK	133.34 (73.38–194.23)	44.95 (34.03–57.12)	7.59 (4.18–11.07)	4.24 (3.21–5.39)	2988.00 (1745.06–4282.48)	923.84 (709.70–1150.76)	169.94 (97.76–244.13)	83.69 (63.61–104.61)
SVN	73.59 (41.03–108.00)	16.15 (11.85–20.82)	1.77 (0.98–2.62)	0.83 (0.60–1.08)	1652.05 (961.74–2381.40)	380.75 (283.32–496.73)	38.56 (22.14–56.55)	16.55 (12.29–21.57)
SWE	28.27 (7.78–53.03)	3.45 (1.08–6.35)	4.68 (1.27–8.82)	0.91 (0.28–1.70)	558.50 (171.31–1022.62)	78.40 (25.04–141.27)	83.21 (23.27–154.30)	16.66 (5.05–30.74)
SWZ	234.12 (174.38–296.56)	158.84 (92.56–239.79)	0.81 (0.57–1.06)	0.83 (0.49–1.29)	6570.49 (4750.90–8440.80)	4362.33 (2622.05–6648.11)	41.73 (27.76–57.07)	32.02 (19.79–49.20)
SYC	30.17 (9.36–54.25)	20.79 (7.70–37.56)	0.02 (0.01–0.03)	0.02 (0.01–0.04)	795.88 (317.65–1364.78)	589.20 (246.60–1011.58)	0.48 (0.20–0.82)	0.64 (0.26–1.12)
SYR	148.47 (105.37–195.22)	127.90 (89.80–172.47)	8.05 (5.85–10.71)	12.84 (8.88–17.51)	3740.36 (2727.47–4935.04)	2690.00 (1916.70–3628.27)	316.11 (218.91–425.50)	331.23 (232.19–455.36)
TCD	254.11 (178.96–318.18)	236.59 (171.99–303.05)	12.60 (8.27–16.30)	22.80 (14.93–30.60)	9245.15 (6046.53–11832.01)	7494.18 (5239.26–9805.70)	803.03 (492.40–1091.95)	1443.61 (900.19–1968.40)
TGO	263.56 (201.47–322.49)	225.27 (168.91–291.25)	5.31 (3.71–6.90)	8.24 (5.92–10.83)	8588.79 (6155.14–10862.37)	6149.19 (4500.03–7964.26)	338.02 (224.33–454.54)	364.80 (255.93–481.24)
THA	152.69 (115.98–184.72)	53.81 (37.63–72.29)	46.85 (36.01–56.40)	56.97 (39.74–76.77)	4007.33 (3166.89–4800.06)	1408.80 (1065.25–1826.80)	1527.85 (1208.35–1853.33)	1397.29 (1049.02–1821.19)
TJK	272.83 (213.16–329.95)	173.92 (136.95–215.59)	9.13 (6.70–11.57)	8.52 (6.79–10.69)	8033.66 (5814.58–10238.02)	4289.39 (3442.82–5352.37)	424.62 (256.07–595.65)	318.11 (236.01–418.36)
TKL	28.26 (1.74–93.08)	20.39 (1.21–48.52)	0.00 (0.00–0.00)	0.00 (0.00–0.00)	744.25 (55.21–2328.79)	672.00 (88.75–1499.07)	0.01 (0.00–0.03)	0.01 (0.00–0.02)
TKM	118.51 (36.49–220.93)	104.51 (63.05–160.45)	2.48 (0.86–4.52)	3.65 (2.21–5.59)	3379.92 (1186.24–6155.55)	2550.78 (1586.38–3759.53)	111.16 (39.79–211.65)	106.18 (65.86–156.77)
TLS	275.03 (213.71–336.75)	193.07 (122.84–262.40)	1.27 (0.81–1.71)	1.52 (1.01–2.05)	9484.96 (6540.62–12272.92)	4870.76 (3369.91–6427.76)	84.87 (46.35–120.21)	51.82 (36.57–67.86)
TON	181.06 (137.74–220.21)	110.54 (65.55–153.63)	0.09 (0.07–0.12)	0.09 (0.05–0.12)	4570.91 (3449.94–5642.57)	2725.75 (1677.18–3813.90)	3.14 (2.33–4.04)	2.33 (1.43–3.26)
TTO	112.55 (27.58–207.36)	63.21 (27.45–104.08)	0.83 (0.22–1.51)	1.17 (0.50–1.93)	2736.73 (928.72–4788.48)	1719.63 (825.78–2736.94)	23.76 (9.08–41.13)	30.78 (14.23–49.15)
TUN	103.02 (75.64–131.35)	66.46 (44.65–93.25)	4.63 (3.42–5.92)	7.79 (5.17–10.96)	2708.02 (2013.53–3445.71)	1531.52 (1061.88–2109.50)	175.25 (127.62–230.09)	191.13 (130.84–265.01)
TUR	127.13 (96.36–164.83)	68.21 (52.17–85.51)	43.00 (32.46–54.93)	57.28 (43.68–72.19)	3607.88 (2725.49–4646.42)	1495.28 (1172.94–1857.97)	1656.33 (1220.02–2209.39)	1316.36 (1027.41–1634.60)
TUV	299.78 (229.33–370.32)	63.93 (37.90–98.28)	0.02 (0.01–0.02)	0.01 (0.00–0.01)	8541.33 (6136.33–11002.25)	1604.44 (943.66–2457.82)	0.77 (0.49–1.07)	0.17 (0.10–0.26)
TWN	73.60 (34.14–124.98)	24.17 (18.33–30.69)	9.26 (4.32–15.66)	10.52 (7.92–13.39)	1612.09 (769.53–2702.16)	607.83 (480.33–767.62)	241.95 (116.30–402.65)	241.69 (190.90–301.35)
TZA	222.97 (151.20–278.88)	165.47 (130.46–207.13)	40.81 (24.04–54.20)	46.79 (36.55–57.48)	8059.83 (5019.85–10400.55)	4772.29 (3746.66–5844.29)	2654.02 (1381.34–3671.32)	2212.44 (1611.75–2890.71)
UGA	225.88 (170.23–279.63)	160.00 (123.26–200.38)	23.99 (16.79–31.18)	28.86 (21.43–36.48)	7131.32 (5165.73–9015.88)	4556.24 (3499.32–5660.22)	1497.14 (988.58–2007.60)	1516.90 (1086.07–1990.27)
UKR	174.33 (96.04–252.68)	78.21 (45.26–122.09)	111.82 (61.26–162.18)	61.58 (35.41–96.21)	3526.91 (2030.96–5008.93)	1559.19 (918.56–2368.61)	2319.36 (1305.62–3327.89)	1161.82 (677.95–1778.25)
URY	53.04 (21.17–87.74)	17.30 (6.88–29.38)	2.01 (0.79–3.35)	1.07 (0.41–1.82)	1253.71 (582.21–1981.57)	415.64 (179.09–704.06)	45.66 (20.15–73.44)	21.58 (8.74–36.88)
USA	41.63 (18.08–69.72)	8.20 (4.12–12.77)	136.25 (58.54–229.17)	50.08 (24.67–78.68)	947.75 (434.04–1537.86)	224.40 (118.09–346.13)	2903.56 (1293.67–4773.75)	1201.98 (608.70–1905.70)
UZB	186.16 (129.65–245.95)	152.77 (112.84–197.48)	24.03 (16.36–32.42)	32.38 (24.16–41.75)	5242.66 (3501.82–7100.51)	3536.77 (2674.31–4527.64)	970.24 (568.15–1418.76)	948.81 (724.29–1221.19)
VCT	124.35 (75.54–180.45)	63.04 (27.59–99.66)	0.09 (0.05–0.12)	0.08 (0.03–0.13)	2969.09 (1908.60–4260.95)	1585.15 (841.22–2388.20)	2.38 (1.57–3.33)	2.03 (1.04–3.10)
VEN	73.40 (40.40–112.18)	42.28 (25.50–64.95)	7.28 (4.30–10.72)	11.88 (7.07–18.25)	1975.96 (1202.12–2896.60)	1123.08 (701.22–1674.51)	271.30 (174.21–386.88)	320.71 (198.99–477.43)
VIR	23.44 (1.59–61.23)	10.86 (4.96–17.39)	0.02 (0.00–0.04)	0.02 (0.01–0.03)	578.26 (83.92–1406.08)	319.71 (154.71–500.18)	0.50 (0.08–1.19)	0.51 (0.24–0.80)
VNM	231.42 (186.31–284.62)	117.31 (84.36–149.56)	94.44 (75.71–115.51)	98.69 (71.01–126.49)	6225.83 (4984.92–7504.53)	2618.71 (1944.21–3343.78)	3413.68 (2628.50–4170.74)	2435.42 (1791.94–3131.54)
VUT	396.29 (322.34–475.74)	321.20 (262.18–379.08)	0.23 (0.18–0.29)	0.48 (0.38–0.57)	10039.77 (8070.67–12402.18)	8039.26 (6553.84–9589.65)	9.48 (7.20–12.09)	16.33 (13.01–19.90)
WSM	277.98 (225.39–331.32)	196.33 (132.53–260.87)	0.22 (0.17–0.26)	0.25 (0.17–0.34)	6803.61 (5439.34–8223.65)	4777.26 (3348.60–6364.99)	7.33 (5.55–9.33)	7.40 (5.14–9.85)
YEM	308.97 (234.66–387.78)	193.38 (141.09–257.92)	22.08 (16.25–28.48)	25.75 (19.31–34.48)	9350.53 (7227.64–11862.79)	4849.65 (3680.37–6432.23)	1303.50 (895.64–1799.98)	1002.61 (774.65–1315.69)
ZAF	106.91 (78.20–138.30)	81.98 (59.78–105.37)	26.19 (18.81–33.89)	33.49 (24.60–43.24)	3897.51 (2742.17–5046.39)	2396.63 (1828.97–3078.39)	1335.06 (890.63–1765.90)	1124.06 (849.00–1447.17)
ZMB	233.13 (172.70–292.76)	188.79 (138.63–239.54)	11.14 (6.88–14.99)	13.62 (9.81–17.72)	7814.88 (5154.65–10087.70)	5092.56 (3738.45–6522.51)	718.11 (394.76–1031.65)	630.92 (437.60–844.74)
ZWE	176.39 (127.48–222.64)	212.11 (159.92–271.00)	8.58 (5.89–10.93)	15.04 (10.75–19.90)	5091.93 (3578.78–6395.00)	6127.39 (4472.58–8033.07)	456.26 (297.64–601.49)	690.98 (467.37–946.02)
DALYs = disability-adjusted life-years. PMP = particulate matter pollution. UI = uncertainty interval.
