# Supplementary material for: Global, regional, and national burden of particulate matter pollution (1990–2021) and projections to 2042: A comprehensive analysis for the Global Burden of Disease database
Source: Research Square preprint supplement (doi:10.21203/rs.3.rs-7087796/v1), 2025-08-13
Supplement: Supplementary file 11 [file f3fe0c135d9c6f621132d665.xlsx]

## Sheet: Table_S10
Table S10: Decompsition of PMP-attributable burdens change in percent, by super-region and gloabal, 1990–2021
	Net percentage change (%)		Change due to population ageing (%)		Change due to population growth (%)	Change due to risk exposure (%)		Change due to risk-deleted rate (%)
	Mortality	DALYs	Mortality	Mortality	Mortality & DALYs	Mortality	DALYs	Mortality	DALYs
Global	8.03392	-19.9894	-37.9782	8.81497	47.9548	-28.1321	-11.1266	58.0278	-44.0933
Southeast Asia, East Asia, and Oceania	5.33141	-26.5164	119.459	8.49373	29.3289	-50.0895	-41.821	-25.0779	-3.57627
North Africa and Middle East	36.0288	-9.22214	-30.7564	5.49387	83.6719	-4.36958	-3.27915	9.16306	-52.0137
South Asia	44.4647	-12.9362	-27.716	-48.2097	68.8814	32.5625	29.8603	-12.2728	-21.2572
Sub-Saharan Africa	16.5613	-4.36484	-9.34	-12.6715	130.615	11.2578	18.3639	-49.8821	-59.8032
Central Europe, Eastern Europe, and Central Asia	-44.1562	-49.967	52.4366	31.2353	-0.727733	-53.226	-49.8024	-20.8192	-22.6693
High-income	-50.5225	-50.5814	74.9942	50.4828	20.093	-60.3384	-58.3856	-39.8053	-34.259
Latin America and Caribbean	-6.32827	-37.5617	19.1289	-20.2893	52.2423	-44.5415	-39.7689	-6.75584	-7.98152
DALYs = disability-adjusted life-years. PMP = particulate matter pollution.
