# Supplementary material for: Global, regional, and national burden of particulate matter pollution (1990–2021) and projections to 2042: A comprehensive analysis for the Global Burden of Disease database
Source: Research Square preprint supplement (doi:10.21203/rs.3.rs-7087796/v1), 2025-08-13
Supplement: Supplementary file 12 [file fee2739a7af629352fe7dc22.xlsx]

## Sheet: Table_S7
Table S7: SDI vs. PMP-attributable burdens, by country and territory, 1990–2021
	Year	SDI	Mortality, rate (per 100 000), age standardized			DALYs, rate (per 100 000), age standardized
			Value	Frontier value	EF	Value	Frontier value	EF
AFG	1990	0.17	425.79	197.7	228.08	13517.3	6054.39	7462.89
AFG	1991	0.18	423.96	198.13	225.83	13343.5	6086.91	7256.57
AFG	1992	0.18	420.75	198.04	222.7	13016.6	6085.17	6931.41
AFG	1993	0.18	420.23	197.88	222.35	12776.3	6092.12	6684.15
AFG	1994	0.18	423.32	198.06	225.25	12781.7	6073.1	6708.6
AFG	1995	0.18	425.61	197.35	228.26	12829.2	6074.7	6754.46
AFG	1996	0.18	428.12	197.77	230.35	12912	6063.77	6848.23
AFG	1997	0.18	429.82	197.5	232.31	12961.8	6068.57	6893.26
AFG	1998	0.18	430.38	197.71	232.68	12960.4	6064.78	6895.65
AFG	1999	0.18	430.61	198.25	232.36	12949	6074.63	6874.32
AFG	2000	0.18	431.8	197.56	234.24	12980.6	6083.92	6896.67
AFG	2001	0.18	431.54	197.46	234.08	12971.9	6090.11	6881.8
AFG	2002	0.18	419.26	198.6	220.66	12436.4	6082.07	6354.36
AFG	2003	0.19	412.73	197.83	214.9	12221.5	6097.87	6123.64
AFG	2004	0.2	406.96	197.63	209.33	12009	6074.99	5934.05
AFG	2005	0.2	400.01	198.14	201.87	11732.8	6066.27	5666.56
AFG	2006	0.21	390.6	197.95	192.65	11339.7	6097.39	5242.3
AFG	2007	0.22	379.54	197.61	181.93	10915	6083.71	4831.3
AFG	2008	0.23	369.12	196.48	172.64	10515.1	6047.49	4467.62
AFG	2009	0.24	357.86	191.27	166.59	10078.4	6064.98	4013.41
AFG	2010	0.25	349.45	185.65	163.8	9759.22	6037.4	3721.82
AFG	2011	0.26	343.09	179.5	163.59	9499.6	5996.73	3502.87
AFG	2012	0.27	336.87	179.42	157.45	9258.04	6022.81	3235.23
AFG	2013	0.28	332.94	173.48	159.45	9116.16	5877.78	3238.38
AFG	2014	0.28	329.65	143.96	185.69	8982.12	4267.71	4714.41
AFG	2015	0.29	326.34	139.54	186.81	8839.25	4128.02	4711.22
AFG	2016	0.3	321.19	138.78	182.41	8667.43	4062.22	4605.21
AFG	2017	0.31	315.12	138.34	176.78	8465.73	4067.38	4398.35
AFG	2018	0.31	308.79	137.59	171.2	8246.59	4051.86	4194.73
AFG	2019	0.32	302.19	137.55	164.64	8044.3	4050.2	3994.1
AFG	2020	0.33	286.41	137.68	148.72	7596.53	4049.87	3546.67
AFG	2021	0.34	288.53	137.54	150.99	7566.53	4050.17	3516.36
AGO	1990	0.27	279.33	172.6	106.73	9611.48	5886.5	3724.98
AGO	1991	0.28	276.85	172.33	104.52	9495.21	5897.16	3598.06
AGO	1992	0.28	274.27	149.49	124.79	9356.28	4566.9	4789.38
AGO	1993	0.28	274.4	151.28	123.13	9313.17	4756.24	4556.94
AGO	1994	0.28	273.9	143.84	130.05	9247.77	4263.57	4984.2
AGO	1995	0.29	270.61	144.71	125.9	9087.12	4170.21	4916.91
AGO	1996	0.29	263.44	139.99	123.44	8793.8	4136.05	4657.74
AGO	1997	0.3	258.28	139.18	119.1	8571.6	4079.49	4492.11
AGO	1998	0.3	256.43	138.76	117.67	8452.68	4093.07	4359.62
AGO	1999	0.3	253.01	138.36	114.65	8277.76	4055.44	4222.32
AGO	2000	0.31	248.17	138.39	109.78	8046.52	4056.58	3989.93
AGO	2001	0.31	239.75	137.41	102.35	7734.6	4051.64	3682.96
AGO	2002	0.32	231.76	137.37	94.39	7405.03	4050.18	3354.85
AGO	2003	0.32	225.69	137.54	88.15	7124.71	4051.36	3073.35
AGO	2004	0.33	222.2	137.67	84.53	6947.07	4051.49	2895.58
AGO	2005	0.33	212.4	137.67	74.74	6579.89	4051.4	2528.49
AGO	2006	0.34	206.35	137.63	68.73	6332.71	4051.17	2281.54
AGO	2007	0.35	197.27	116.85	80.42	6016.13	3727.95	2288.18
AGO	2008	0.36	191.33	111.57	79.76	5767.27	3649.91	2117.36
AGO	2009	0.36	184.42	107.42	77.01	5510.2	3464.71	2045.48
AGO	2010	0.37	177.44	104.17	73.27	5267.22	3357.15	1910.07
AGO	2011	0.38	170.8	103.72	67.08	5031.26	3309.23	1722.02
AGO	2012	0.39	164.07	103.14	60.93	4802.5	3281.21	1521.29
AGO	2013	0.4	157.12	99.77	57.35	4569.06	3127.95	1441.11
AGO	2014	0.4	148.54	96.8	51.74	4306.07	2992.99	1313.08
AGO	2015	0.41	144.57	95.66	48.91	4156.78	2934.43	1222.35
AGO	2016	0.42	141.41	93.82	47.59	4020.35	2861.2	1159.15
AGO	2017	0.43	139.43	91.87	47.56	3916.57	2713.05	1203.52
AGO	2018	0.43	137.95	92.03	45.92	3820.63	2681.99	1138.63
AGO	2019	0.44	137.62	90.58	47.04	3762.41	2618.2	1144.21
AGO	2020	0.45	136.89	87.63	49.26	3683.95	2501.64	1182.3
AGO	2021	0.45	136.81	87.62	49.2	3662.42	2513.09	1149.32
ALB	1990	0.56	213.18	26.75	186.43	4992.69	701.83	4290.87
ALB	1991	0.56	210.72	27.46	183.26	4996.52	721.47	4275.05
ALB	1992	0.55	197.64	27.42	170.22	4738.85	722.2	4016.65
ALB	1993	0.55	185.37	27.46	157.92	4493.17	721.23	3771.94
ALB	1994	0.55	171.1	27.45	143.66	4192.67	721.1	3471.57
ALB	1995	0.56	174.87	26.75	148.12	4191.5	697.61	3493.88
ALB	1996	0.56	183.02	25.77	157.25	4272.4	673.89	3598.51
ALB	1997	0.57	181.09	24.6	156.49	4200.41	651.35	3549.05
ALB	1998	0.57	174.17	24.06	150.1	4041.19	630.49	3410.7
ALB	1999	0.58	169.23	23.43	145.8	3882.89	621.44	3261.45
ALB	2000	0.58	167.45	23.26	144.2	3778.6	608.82	3169.78
ALB	2001	0.59	159.13	22.58	136.55	3587.99	595.87	2992.12
ALB	2002	0.6	159.51	22.25	137.26	3521.35	585.61	2935.74
ALB	2003	0.61	161.35	21.54	139.8	3475.04	568.98	2906.06
ALB	2004	0.61	155.16	20.54	134.63	3315.11	542.36	2772.76
ALB	2005	0.62	146.36	19.12	127.24	3115.53	504.21	2611.33
ALB	2006	0.63	132.91	17.99	114.92	2839.15	466.73	2372.42
ALB	2007	0.63	117.17	17.18	99.99	2517.58	448.43	2069.15
ALB	2008	0.64	110.69	16.58	94.1	2349.31	437.43	1911.87
ALB	2009	0.65	102.79	16.22	86.56	2162.37	427.7	1734.66
ALB	2010	0.65	98.42	15.86	82.56	2057.92	420.43	1637.5
ALB	2011	0.66	94.81	15.59	79.22	1989.94	410.99	1578.95
ALB	2012	0.66	92.85	14.48	78.37	1931.06	373.13	1557.93
ALB	2013	0.67	91.53	13.76	77.77	1880.52	356.69	1523.83
ALB	2014	0.67	89.94	13.54	76.4	1826.8	351.06	1475.74
ALB	2015	0.68	87	13.23	73.77	1754.3	336.63	1417.67
ALB	2016	0.69	83.21	13.09	70.12	1668.89	335.79	1333.1
ALB	2017	0.69	78.25	13.1	65.16	1560.06	334.94	1225.12
ALB	2018	0.7	71.9	13.11	58.79	1438.67	335.18	1103.48
ALB	2019	0.7	67.9	13.1	54.81	1365.77	334.78	1031
ALB	2020	0.7	65.51	13.1	52.41	1287.36	334.66	952.7
ALB	2021	0.71	65.81	13.11	52.69	1277.5	335.18	942.33
AND	1990	0.76	32.62	7.56	25.06	698.65	190.22	508.43
AND	1991	0.76	31.63	7.09	24.54	677.17	190	487.18
AND	1992	0.77	31.03	7.04	23.99	666.07	189.94	476.12
AND	1993	0.77	30.17	7.06	23.11	641.99	188.77	453.22
AND	1994	0.77	29.39	7.05	22.34	624.95	190.48	434.47
AND	1995	0.77	28.65	7.01	21.64	608.22	191.3	416.92
AND	1996	0.77	28.38	6.9	21.48	601.37	190.55	410.83
AND	1997	0.77	28.25	6.91	21.35	597.59	191.31	406.28
AND	1998	0.78	28.29	6.88	21.41	598.44	189.28	409.16
AND	1999	0.78	28.19	6.86	21.33	595.89	188.81	407.08
AND	2000	0.78	27.84	6.87	20.98	589.25	188.44	400.81
AND	2001	0.79	25.18	6.79	18.38	536.93	184.21	352.72
AND	2002	0.79	23.06	6.81	16.26	493.74	164.83	328.91
AND	2003	0.8	21.79	6.6	15.18	471.41	159	312.41
AND	2004	0.8	20.6	6.57	14.03	449.39	157.79	291.6
AND	2005	0.81	19.13	6.56	12.58	420.92	148.74	272.19
AND	2006	0.82	18.15	6.13	12.02	399.04	141.9	257.14
AND	2007	0.83	16.95	5.99	10.95	375.57	134.28	241.29
AND	2008	0.83	16.77	5.88	10.89	367.08	130.47	236.61
AND	2009	0.84	16.53	5.37	11.16	358.75	119.47	239.28
AND	2010	0.84	16.37	4.8	11.57	352.26	103.15	249.11
AND	2011	0.84	15.69	4.15	11.54	336.7	91.87	244.84
AND	2012	0.85	15	3.83	11.17	323.66	86.09	237.57
AND	2013	0.85	14.5	3.79	10.72	312.96	87.34	225.62
AND	2014	0.85	14.01	3.56	10.45	302.58	82.8	219.78
AND	2015	0.85	13.33	3.34	9.99	288.96	79.18	209.78
AND	2016	0.86	12.33	3.15	9.18	268.96	74.34	194.62
AND	2017	0.86	10.97	2.44	8.53	241.24	59.12	182.12
AND	2018	0.86	9.77	2.33	7.44	216.32	59.83	156.49
AND	2019	0.87	9.07	2.46	6.61	202.97	59.17	143.8
AND	2020	0.87	7.61	2.36	5.25	176.98	59.63	117.35
AND	2021	0.87	7.42	2.43	4.99	171.59	57.16	114.43
ARE	1990	0.64	181.27	16.24	165.03	4233.3	428.47	3804.82
ARE	1991	0.66	179.39	15.07	164.32	4176.68	385.33	3791.34
ARE	1992	0.68	159.76	13.21	146.55	3893.66	337.35	3556.31
ARE	1993	0.69	152.68	13.12	139.56	3743.25	335.17	3408.08
ARE	1994	0.7	149.24	13.09	136.15	3662.01	334.94	3327.06
ARE	1995	0.71	139.55	13.1	126.45	3472.2	334.99	3137.21
ARE	1996	0.72	135.23	13.1	122.14	3364.09	315.03	3049.05
ARE	1997	0.73	138.05	9.19	128.86	3390.27	225.78	3164.5
ARE	1998	0.74	152.62	7.97	144.65	3588.42	191.4	3397.02
ARE	1999	0.75	162.92	7.63	155.29	3753.15	190	3563.15
ARE	2000	0.76	176.79	7.54	169.25	3926.25	191.21	3735.04
ARE	2001	0.77	183.88	7.06	176.81	4004.78	189.76	3815.02
ARE	2002	0.77	164.29	6.85	157.44	3728.64	188.59	3540.04
ARE	2003	0.78	154.85	6.84	148.01	3565.59	188.29	3377.3
ARE	2004	0.79	163.07	6.83	156.24	3634.16	175	3459.16
ARE	2005	0.8	171.22	6.6	164.62	3697.48	158.82	3538.66
ARE	2006	0.81	181.57	6.57	175.01	3754.91	157.82	3597.09
ARE	2007	0.81	210.07	6.25	203.82	4117.67	149.61	3968.05
ARE	2008	0.82	223.34	6.11	217.23	4279.26	137.04	4142.22
ARE	2009	0.83	215.6	5.87	209.73	4146.12	130.71	4015.41
ARE	2010	0.83	184.32	5.87	178.45	3649.84	130.41	3519.43
ARE	2011	0.83	180.83	5.87	174.96	3580.58	130.3	3450.28
ARE	2012	0.83	174.27	5.86	168.42	3478.9	130.38	3348.52
ARE	2013	0.83	187.53	5.86	181.67	3653.72	130.49	3523.23
ARE	2014	0.83	203.13	5.87	197.25	3872.02	130.77	3741.25
ARE	2015	0.83	209.64	5.89	203.75	3943.52	130.54	3812.97
ARE	2016	0.84	217.15	5.46	211.69	4008.23	119.75	3888.48
ARE	2017	0.84	202.38	5.44	196.94	3745.6	119.59	3626.01
ARE	2018	0.84	187.47	4.84	182.64	3479.74	104.55	3375.19
ARE	2019	0.84	170.41	4.08	166.32	3194.4	93.06	3101.34
ARE	2020	0.85	112.31	3.8	108.51	2216.34	86.51	2129.83
ARE	2021	0.85	114.23	3.56	110.67	2255.67	82.14	2173.53
ARG	1990	0.59	71.04	22.94	48.1	1754.46	603.44	1151.02
ARG	1991	0.59	68.2	23.02	45.18	1709.51	602.53	1106.98
ARG	1992	0.6	66.95	22.61	44.34	1682.79	597.01	1085.78
ARG	1993	0.6	64.58	22.21	42.37	1627.85	585.39	1042.46
ARG	1994	0.61	60.86	21.48	39.39	1549.09	572.85	976.23
ARG	1995	0.61	60.06	20.48	39.57	1522.78	536.51	986.27
ARG	1996	0.62	58.03	19.53	38.51	1478.4	501.38	977.02
ARG	1997	0.62	55.92	19.4	36.52	1407.66	510.33	897.33
ARG	1998	0.63	55.57	17.94	37.62	1384.32	473.09	911.22
ARG	1999	0.63	54.44	17.22	37.22	1332.42	448.74	883.67
ARG	2000	0.64	50.48	16.59	33.89	1241.99	436.4	805.59
ARG	2001	0.64	49.03	16.24	32.8	1201.31	427.25	774.06
ARG	2002	0.64	48.39	16.19	32.2	1192.11	427.93	764.19
ARG	2003	0.65	47.71	16.26	31.46	1166.21	429.43	736.78
ARG	2004	0.65	45.04	15.83	29.21	1090.82	419.58	671.23
ARG	2005	0.65	42.39	15.61	26.78	1022.69	411.45	611.24
ARG	2006	0.66	40.27	15.59	24.69	971.91	411.25	560.66
ARG	2007	0.66	39.24	15.03	24.21	945.77	388.48	557.29
ARG	2008	0.66	35.76	15.03	20.74	871.03	387.83	483.2
ARG	2009	0.67	34.14	14.4	19.74	834.86	371.46	463.4
ARG	2010	0.67	33.85	13.83	20.02	813.07	353.09	459.98
ARG	2011	0.68	33.8	13.53	20.27	807.49	350.27	457.23
ARG	2012	0.68	33.58	13.21	20.37	797.82	337.82	460
ARG	2013	0.68	33.89	13.11	20.78	802.23	336.49	465.73
ARG	2014	0.68	33.84	13.13	20.71	794.72	336.15	458.57
ARG	2015	0.69	34.61	13.1	21.52	803.71	334.94	468.77
ARG	2016	0.7	35.9	13.1	22.8	829.01	335.12	493.89
ARG	2017	0.71	34.45	13.11	21.34	794.09	335.03	459.06
ARG	2018	0.71	33.4	13.11	20.29	774.49	335.15	439.35
ARG	2019	0.72	32.8	13.1	19.69	761.45	334.46	426.99
ARG	2020	0.72	31.2	13.1	18.1	741.75	325.57	416.18
ARG	2021	0.72	27.34	13.09	14.26	659.77	315.44	344.33
ARM	1990	0.54	161.24	28.16	133.08	4065.9	735.38	3330.52
ARM	1991	0.55	170.63	27.97	142.67	4195.13	730.26	3464.88
ARM	1992	0.55	190.45	27.95	162.49	4549.31	731.21	3818.11
ARM	1993	0.55	203.5	27.45	176.04	4774.16	720.66	4053.49
ARM	1994	0.55	195.74	27.45	168.29	4629.01	720.64	3908.37
ARM	1995	0.56	192.35	26.66	165.68	4526.99	698.35	3828.65
ARM	1996	0.56	191.51	26.61	164.9	4471.29	701.11	3770.19
ARM	1997	0.56	180.96	25.71	155.26	4218.64	673.18	3545.45
ARM	1998	0.57	176.08	24.8	151.27	4071.79	648.32	3423.47
ARM	1999	0.57	176.56	24.37	152.2	4030.43	631.3	3399.13
ARM	2000	0.58	171.67	23.37	148.31	3880.87	619.63	3261.24
ARM	2001	0.59	167.91	23.16	144.75	3771.24	609.13	3162.11
ARM	2002	0.59	163.71	22.62	141.09	3612.52	597.69	3014.83
ARM	2003	0.6	161.37	22.26	139.11	3524.85	586.02	2938.83
ARM	2004	0.61	155.55	21.49	134.06	3399.26	571.48	2827.78
ARM	2005	0.62	149.48	20.58	128.9	3295.09	539.6	2755.5
ARM	2006	0.63	145.87	18.09	127.78	3230.72	468.82	2761.9
ARM	2007	0.64	142.05	17.36	124.69	3143.54	453.13	2690.41
ARM	2008	0.64	143.08	16.19	126.89	3144.48	428.36	2716.12
ARM	2009	0.65	142.09	15.89	126.19	3117.46	420.19	2697.27
ARM	2010	0.65	138.4	15.64	122.76	3024.75	411.45	2613.3
ARM	2011	0.66	135.02	15.06	119.96	2949.96	387.14	2562.82
ARM	2012	0.66	131.02	14.44	116.59	2862.59	369.08	2493.5
ARM	2013	0.67	127.38	13.81	113.57	2767.16	354.7	2412.46
ARM	2014	0.67	127.68	13.56	114.12	2755.69	348.53	2407.17
ARM	2015	0.68	126.6	13.2	113.4	2733.28	337.58	2395.69
ARM	2016	0.68	121.91	13.13	108.78	2650.29	336.59	2313.7
ARM	2017	0.69	112.9	13.11	99.8	2486.42	334.83	2151.59
ARM	2018	0.69	106.35	13.12	93.23	2356.2	335.53	2020.68
ARM	2019	0.69	101.48	13.1	88.38	2244.74	335.73	1909.01
ARM	2020	0.7	96.06	13.1	82.96	2111.72	334.67	1777.06
ARM	2021	0.7	98.04	13.1	84.94	2137.51	335.01	1802.5
ASM	1990	0.61	27.58	20.38	7.19	737.48	542.04	195.43
ASM	1991	0.62	27.39	20.46	6.93	734.47	539.71	194.76
ASM	1992	0.62	27.41	19.4	8.01	734.7	503.62	231.08
ASM	1993	0.62	27.58	19.29	8.29	737.97	503.74	234.22
ASM	1994	0.63	27.8	18.11	9.69	743.21	467.36	275.86
ASM	1995	0.63	27.98	17.9	10.08	749.22	474.9	274.32
ASM	1996	0.63	28.5	17.29	11.2	763.04	449.42	313.62
ASM	1997	0.63	29.42	16.97	12.45	786.81	446.52	340.29
ASM	1998	0.64	30.39	16.58	13.81	812.05	439.02	373.04
ASM	1999	0.64	31.26	16.66	14.6	833.8	435.86	397.95
ASM	2000	0.64	31.55	16.6	14.95	841.86	441.08	400.78
ASM	2001	0.64	31.46	16.21	15.26	839.65	428.84	410.81
ASM	2002	0.65	31.38	16.23	15.15	837.49	427.21	410.28
ASM	2003	0.65	31.12	15.91	15.21	831.28	420.15	411.14
ASM	2004	0.65	30.56	15.93	14.63	817.16	419.82	397.34
ASM	2005	0.66	30.05	15.62	14.43	805.17	412.07	393.11
ASM	2006	0.66	29.32	15.55	13.77	787.33	411.07	376.26
ASM	2007	0.66	28.32	15.06	13.26	761.78	390.44	371.35
ASM	2008	0.66	27.35	14.4	12.95	737.06	367.48	369.59
ASM	2009	0.67	26.67	13.83	12.84	720.26	356.72	363.54
ASM	2010	0.67	26.22	13.55	12.67	709.88	347.92	361.96
ASM	2011	0.68	26.14	13.26	12.88	712.19	336.86	375.32
ASM	2012	0.68	26.19	13.13	13.06	715.85	335.58	380.26
ASM	2013	0.69	26.36	13.13	13.23	722.87	336.62	386.25
ASM	2014	0.69	26.68	13.1	13.58	733.18	334.62	398.57
ASM	2015	0.7	27.02	13.09	13.93	743.86	334.83	409.02
ASM	2016	0.7	27.42	13.11	14.31	756.26	334.98	421.28
ASM	2017	0.71	27.83	13.1	14.73	769.16	335.24	433.92
ASM	2018	0.71	28.4	13.08	15.32	784.88	334.61	450.27
ASM	2019	0.72	28.67	13.09	15.58	792.28	334.26	458.02
ASM	2020	0.72	30.08	13.09	16.99	827.89	325.32	502.58
ASM	2021	0.72	28.53	13.1	15.43	791.78	313.69	478.09
ATG	1990	0.61	60.68	20.48	40.2	1445.49	541.92	903.57
ATG	1991	0.62	62.89	19.26	43.63	1465.99	502.69	963.3
ATG	1992	0.62	63.36	17.99	45.37	1473.81	467.41	1006.4
ATG	1993	0.63	68.51	18.07	50.44	1555.17	472.33	1082.84
ATG	1994	0.63	67.91	17.14	50.78	1548.96	447.17	1101.8
ATG	1995	0.64	67.7	16.57	51.13	1553.18	438.61	1114.58
ATG	1996	0.64	63.1	16.23	46.88	1474.96	427.99	1046.97
ATG	1997	0.65	61.58	16.24	45.34	1445.33	428.05	1017.28
ATG	1998	0.65	60.2	15.9	44.3	1419.13	420.36	998.77
ATG	1999	0.66	58.63	15.58	43.04	1386.55	411.72	974.83
ATG	2000	0.66	55.52	15.07	40.44	1320.31	387.84	932.47
ATG	2001	0.67	54.01	14.38	39.63	1293.54	366.31	927.23
ATG	2002	0.67	51.54	13.81	37.73	1241.86	355.16	886.7
ATG	2003	0.68	50.2	13.52	36.68	1208.37	348.21	860.17
ATG	2004	0.68	48.82	13.27	35.55	1177.25	336.91	840.35
ATG	2005	0.69	48.18	13.14	35.04	1161.01	335.71	825.3
ATG	2006	0.69	47.34	13.1	34.24	1140.1	335.22	804.88
ATG	2007	0.7	51.1	13.09	38	1196.25	334.82	861.43
ATG	2008	0.7	50.46	13.08	37.38	1183.56	334.97	848.59
ATG	2009	0.71	48.43	13.11	35.33	1128.76	335.31	793.45
ATG	2010	0.71	47.77	13.11	34.66	1117.67	335.02	782.65
ATG	2011	0.72	46.77	13.1	33.67	1104.1	334.86	769.24
ATG	2012	0.72	47.33	13.11	34.22	1121.1	334.39	786.71
ATG	2013	0.72	48.67	13.11	35.56	1153.05	325.01	828.04
ATG	2014	0.73	49.41	13.1	36.31	1170.1	315.81	854.29
ATG	2015	0.73	48.98	11.7	37.28	1165.6	277.05	888.55
ATG	2016	0.73	48.2	10.45	37.75	1155.23	245.58	909.65
ATG	2017	0.73	47.13	9.13	38	1134.03	221.29	912.73
ATG	2018	0.74	46.16	8.53	37.64	1113.93	206.74	907.18
ATG	2019	0.74	45.96	8.32	37.63	1109.75	202.88	906.87
ATG	2020	0.75	43.87	7.81	36.06	1058.72	190.1	868.63
ATG	2021	0.75	41.24	7.79	33.44	1027.6	188.93	838.67
AUS	1990	0.73	16.58	12.1	4.48	343.82	292.71	51.1
AUS	1991	0.73	15.39	11.64	3.75	319.01	276.99	42.02
AUS	1992	0.73	14.86	10.44	4.42	306.92	244.92	62
AUS	1993	0.74	14.08	8.5	5.58	288.48	206.42	82.06
AUS	1994	0.74	13.74	8.35	5.4	279.08	201.38	77.7
AUS	1995	0.75	13.15	7.83	5.33	267.79	190.5	77.28
AUS	1996	0.75	12.81	7.66	5.15	261.1	189.07	72.03
AUS	1997	0.76	12.35	7.52	4.82	250.94	191.4	59.54
AUS	1998	0.76	11.68	7.53	4.15	238.55	190.05	48.5
AUS	1999	0.77	11.13	7.15	3.98	228.81	189.9	38.91
AUS	2000	0.77	10.6	7.02	3.58	219.1	190.04	29.06
AUS	2001	0.77	9.94	6.88	3.07	207.46	189.42	18.04
AUS	2002	0.78	9.36	6.83	2.53	195.29	187.8	7.49
AUS	2003	0.78	8.64	6.82	1.81	181.23	181.23	0
AUS	2004	0.79	7.97	6.82	1.15	169.21	169.21	0
AUS	2005	0.79	7.48	6.81	0.66	160.68	160.68	0
AUS	2006	0.79	7.31	6.81	0.5	157.29	157.29	0
AUS	2007	0.79	7.47	6.61	0.86	158.99	157.78	1.21
AUS	2008	0.8	7.63	6.58	1.04	161.88	158.28	3.6
AUS	2009	0.8	7.58	6.58	1	162.45	157.67	4.78
AUS	2010	0.8	7.43	6.55	0.88	160.05	157.98	2.07
AUS	2011	0.81	7.14	6.57	0.57	154.11	154.11	0
AUS	2012	0.81	6.69	6.56	0.12	144.96	144.96	0
AUS	2013	0.82	6.28	6.17	0.11	138.76	138.76	0
AUS	2014	0.82	6.11	6.1	0	135.51	135.51	0
AUS	2015	0.82	5.96	5.96	0	132.99	132.99	0
AUS	2016	0.83	6.34	5.89	0.46	141.88	130.51	11.37
AUS	2017	0.83	7.39	5.89	1.51	165.57	130.51	35.06
AUS	2018	0.84	8.24	5.43	2.81	185.93	118.53	67.4
AUS	2019	0.84	8.86	4.75	4.11	200.44	103.31	97.13
AUS	2020	0.84	6.57	4.16	2.41	153.08	93.21	59.87
AUS	2021	0.84	8.32	4.19	4.13	188.44	93.05	95.39
AUT	1990	0.75	65.36	7.79	57.57	1307.68	189.58	1118.1
AUT	1991	0.75	65.64	7.64	58.01	1309.17	190.94	1118.23
AUT	1992	0.75	64.45	7.64	56.81	1285.09	190.37	1094.72
AUT	1993	0.76	62.89	7.55	55.34	1254.78	190.08	1064.7
AUT	1994	0.76	60.87	7.08	53.79	1215.54	190.5	1025.04
AUT	1995	0.77	59.17	7.02	52.16	1182.92	190.33	992.59
AUT	1996	0.77	58.03	6.86	51.17	1155.93	189.74	966.19
AUT	1997	0.78	55.42	6.83	48.59	1098.06	189.67	908.39
AUT	1998	0.78	53	6.87	46.13	1044.37	188.6	855.77
AUT	1999	0.79	49.8	6.8	43	980.05	174.8	805.25
AUT	2000	0.79	45.6	6.62	38.98	911.5	160.15	751.35
AUT	2001	0.8	42.95	6.58	36.37	859.17	158.92	700.26
AUT	2002	0.8	41.51	6.56	34.95	821.17	157.82	663.35
AUT	2003	0.8	40.19	6.57	33.62	791.56	157.7	633.86
AUT	2004	0.8	37.77	6.57	31.2	748.1	157.73	590.37
AUT	2005	0.81	35.78	6.56	29.21	714.85	155.66	559.19
AUT	2006	0.81	34.02	6.55	27.47	681.18	149.26	531.92
AUT	2007	0.82	32.3	6.29	26.01	647.52	147.25	500.27
AUT	2008	0.82	30.46	6.18	24.28	610.7	142.27	468.43
AUT	2009	0.82	29.1	6.11	22.99	588	137.41	450.59
AUT	2010	0.82	26.94	6.1	20.83	554.95	136.2	418.74
AUT	2011	0.83	25.25	5.87	19.39	522.36	130.65	391.71
AUT	2012	0.83	23.86	5.9	17.96	492.27	130.8	361.47
AUT	2013	0.83	22.54	5.87	16.67	467.24	130.21	337.03
AUT	2014	0.84	21.02	5.46	15.56	438.62	119.53	319.09
AUT	2015	0.84	20.02	4.76	15.26	419.51	102.82	316.69
AUT	2016	0.84	18.61	4.84	13.77	392.65	104.3	288.35
AUT	2017	0.84	17.39	4.11	13.29	368.08	92.3	275.78
AUT	2018	0.85	16.44	3.89	12.55	347.19	87.11	260.08
AUT	2019	0.85	14.86	3.59	11.27	318.58	83.38	235.19
AUT	2020	0.85	13.72	3.57	10.16	290.24	83.23	207.01
AUT	2021	0.85	13.6	3.36	10.24	292.95	79.47	213.48
AZE	1990	0.6	180.65	22.59	158.06	5624.37	595.58	5028.79
AZE	1991	0.6	190.18	22.6	167.57	5910.89	596.36	5314.53
AZE	1992	0.59	205.2	22.53	182.67	6305.66	596.7	5708.96
AZE	1993	0.59	216.04	22.61	193.43	6580.04	596.38	5983.66
AZE	1994	0.59	222.68	22.91	199.77	6767.92	603.52	6164.4
AZE	1995	0.59	223.25	22.9	200.34	6755.96	603.79	6152.17
AZE	1996	0.59	216.31	23.16	193.15	6608.31	608.73	5999.58
AZE	1997	0.58	206.64	23.37	183.26	6379.41	609.11	5770.3
AZE	1998	0.58	200.03	23.53	176.51	6213.59	617.88	5595.7
AZE	1999	0.58	194.59	23.65	170.95	6039.1	619.32	5419.78
AZE	2000	0.58	189.6	23.48	166.12	5831.28	619.36	5211.91
AZE	2001	0.58	179	23.21	155.79	5467.14	610.61	4856.53
AZE	2002	0.59	174.73	23.1	151.63	5228.69	609.88	4618.81
AZE	2003	0.59	171.82	22.96	148.86	5045.4	602.78	4442.62
AZE	2004	0.59	166.3	22.57	143.73	4807.03	594.7	4212.33
AZE	2005	0.6	164.39	22.28	142.11	4642.76	585.69	4057.07
AZE	2006	0.61	158.88	20.35	138.53	4409.42	539.42	3870
AZE	2007	0.63	152.43	18.1	134.33	4158.53	468.58	3689.95
AZE	2008	0.64	148.54	16.54	132	4006.84	437.13	3569.71
AZE	2009	0.65	144.77	16.24	128.53	3861.7	427.9	3433.8
AZE	2010	0.65	143.16	15.93	127.23	3767.73	421.77	3345.96
AZE	2011	0.66	141.59	15.54	126.05	3676.05	411.68	3264.37
AZE	2012	0.66	142.95	15.08	127.87	3622.23	386.56	3235.67
AZE	2013	0.67	142.75	13.84	128.91	3551.16	356.93	3194.22
AZE	2014	0.67	143.16	13.46	129.7	3494.95	347.82	3147.13
AZE	2015	0.68	140.72	13.26	127.46	3411.39	336.57	3074.82
AZE	2016	0.68	138.15	13.21	124.95	3316.83	337.27	2979.55
AZE	2017	0.68	132.75	13.11	119.64	3179.74	335.59	2844.15
AZE	2018	0.69	118.53	13.11	105.42	2903.57	335.24	2568.33
AZE	2019	0.69	111.06	13.1	97.95	2741.62	334.91	2406.71
AZE	2020	0.69	105.44	13.08	92.37	2574.56	334.91	2239.65
AZE	2021	0.69	100.43	13.08	87.35	2427.19	335.24	2091.95
BDI	1990	0.21	337.89	197.8	140.09	10593.4	6111.81	4481.63
BDI	1991	0.21	338.79	197.74	141.05	10575	6099.17	4475.83
BDI	1992	0.21	339.51	198.01	141.5	10554.8	6094.26	4460.53
BDI	1993	0.21	341.91	197.9	144.01	10646.6	6098.99	4547.58
BDI	1994	0.22	341.86	197.49	144.36	10596.1	6113.51	4482.58
BDI	1995	0.22	340.2	198.03	142.16	10424.4	6110.76	4313.62
BDI	1996	0.22	338.69	197.75	140.94	10328.9	6074.47	4254.38
BDI	1997	0.22	333.83	198.21	135.62	10190	6101.3	4088.75
BDI	1998	0.22	326.37	197.95	128.42	9913.41	6059.82	3853.59
BDI	1999	0.22	316.8	198.23	118.57	9591.79	6085.75	3506.05
BDI	2000	0.22	307.52	198.07	109.45	9319.25	6108.22	3211.03
BDI	2001	0.22	293.08	197.3	95.78	8919.25	6095	2824.25
BDI	2002	0.22	282.26	197.76	84.5	8628.14	6052	2576.14
BDI	2003	0.22	271.99	198.08	73.91	8341.88	6093.92	2247.96
BDI	2004	0.22	266.43	197.17	69.26	8179.71	6078.45	2101.27
BDI	2005	0.22	258	196.46	61.54	7926.34	6090.23	1836.11
BDI	2006	0.23	250.38	196.46	53.92	7680.97	6081.06	1599.91
BDI	2007	0.23	239.96	196.93	43.03	7397.54	6130.12	1267.42
BDI	2008	0.23	232.12	196.83	35.29	7145.28	6092.75	1052.53
BDI	2009	0.24	229.92	191.69	38.23	7035.06	6068.16	966.9
BDI	2010	0.24	228.17	191.89	36.28	6948.06	6066.51	881.54
BDI	2011	0.25	227.28	186.64	40.64	6890.21	6040	850.21
BDI	2012	0.25	225.04	186.11	38.93	6781.8	6073.47	708.33
BDI	2013	0.26	222.14	177.77	44.37	6644.22	6021.52	622.7
BDI	2014	0.26	219.93	178.92	41.01	6522.48	6022.5	499.98
BDI	2015	0.27	217.82	178.44	39.38	6414.76	6019.97	394.79
BDI	2016	0.27	215.55	172.6	42.95	6289.96	5887.41	402.54
BDI	2017	0.28	213.88	173.3	40.58	6170.35	5894.58	275.77
BDI	2018	0.28	212.4	151.21	61.19	6037.71	4865.3	1172.42
BDI	2019	0.28	212.01	145.1	66.91	5953.86	4264.6	1689.26
BDI	2020	0.29	205.51	143.98	61.52	5703.66	4285.79	1417.88
BDI	2021	0.29	206.7	140.33	66.38	5696.14	4229.82	1466.32
BEL	1990	0.74	66.03	9.16	56.87	1343.32	227.27	1116.05
BEL	1991	0.74	63.18	8.31	54.87	1291.91	200.68	1091.23
BEL	1992	0.75	61.28	7.78	53.5	1252.72	189.06	1063.66
BEL	1993	0.75	60.09	7.66	52.42	1227.81	192.99	1034.83
BEL	1994	0.76	57.18	7.53	49.65	1176.4	189.94	986.46
BEL	1995	0.76	55.48	7.13	48.34	1140.61	190.78	949.83
BEL	1996	0.77	54.18	7.04	47.14	1103.12	189.96	913.16
BEL	1997	0.77	52.03	7.06	44.97	1060.4	190.74	869.66
BEL	1998	0.77	50.57	6.88	43.69	1025.18	190.63	834.55
BEL	1999	0.78	48.45	6.84	41.61	984.63	188.92	795.71
BEL	2000	0.78	45.21	6.84	38.37	927.64	188.87	738.77
BEL	2001	0.78	42.56	6.83	35.73	874.66	183.31	691.35
BEL	2002	0.79	41.53	6.82	34.71	846.52	174.99	671.53
BEL	2003	0.79	40.11	6.62	33.49	811.92	159.85	652.07
BEL	2004	0.8	36.92	6.61	30.31	753.95	159.03	594.92
BEL	2005	0.8	34.72	6.6	28.12	721.22	157.73	563.49
BEL	2006	0.8	32.67	6.58	26.09	688.31	158.15	530.16
BEL	2007	0.8	31.72	6.57	25.15	672.82	157.74	515.08
BEL	2008	0.81	30.99	6.57	24.42	658.2	155.65	502.55
BEL	2009	0.81	29.87	6.56	23.31	638.79	155.68	483.11
BEL	2010	0.82	28.15	6.24	21.91	610.23	146.87	463.36
BEL	2011	0.82	26.44	6.15	20.29	579.08	142.04	437.03
BEL	2012	0.82	24.87	6.1	18.77	543.86	135.85	408.01
BEL	2013	0.83	22.71	5.87	16.84	499.49	130.88	368.61
BEL	2014	0.83	20.18	5.87	14.31	448.69	130.31	318.38
BEL	2015	0.84	18.74	5.35	13.39	416.73	118.04	298.69
BEL	2016	0.84	17.03	4.75	12.27	382.69	104.34	278.35
BEL	2017	0.84	15.51	4.19	11.32	352.06	92.68	259.39
BEL	2018	0.85	14.32	3.82	10.5	328.4	86.94	241.46
BEL	2019	0.85	13.47	3.55	9.92	312.09	83.4	228.69
BEL	2020	0.85	12.69	3.56	9.13	291.31	82.03	209.27
BEL	2021	0.85	12.04	3.36	8.68	290.9	79.12	211.77
BEN	1990	0.22	263.33	197.79	65.54	9115.56	6079.62	3035.94
BEN	1991	0.22	261.01	196.51	64.5	9030.22	6062.11	2968.1
BEN	1992	0.23	258.27	196.46	61.81	8919.5	6064.67	2854.83
BEN	1993	0.23	255.29	196.79	58.51	8797.99	6095.94	2702.05
BEN	1994	0.23	254.06	191.62	62.44	8721.75	6036.31	2685.45
BEN	1995	0.24	252.32	191.83	60.49	8613.88	6060.69	2553.19
BEN	1996	0.24	251.02	191.75	59.27	8522.18	6057.65	2464.53
BEN	1997	0.25	247.92	185.67	62.25	8385.43	6049.7	2335.73
BEN	1998	0.25	245.3	185.17	60.13	8246.25	6054.91	2191.34
BEN	1999	0.25	242.32	186.98	55.34	8098.86	6034.26	2064.6
BEN	2000	0.26	240.69	178.55	62.14	8010.64	6023.36	1987.28
BEN	2001	0.26	234.08	179.11	54.97	7773.05	6007.73	1765.31
BEN	2002	0.27	230.78	179.63	51.15	7655.79	6013.04	1642.74
BEN	2003	0.27	224.32	172.61	51.71	7435.14	5880.86	1554.29
BEN	2004	0.27	220	173.16	46.84	7294.45	5903.3	1391.15
BEN	2005	0.28	216.25	148.41	67.84	7143.05	4861.72	2281.33
BEN	2006	0.28	215	144.04	70.96	7057.57	4248.95	2808.62
BEN	2007	0.29	212.3	144.35	67.95	6956.27	4328.82	2627.45
BEN	2008	0.29	212.15	140.21	71.94	6880.33	4145.99	2734.34
BEN	2009	0.3	213.31	139.26	74.06	6879.98	4080.72	2799.26
BEN	2010	0.3	214.5	138.27	76.23	6890.45	4076.51	2813.94
BEN	2011	0.31	215.47	138.47	77	6886.98	4052.79	2834.19
BEN	2012	0.31	216.89	137.53	79.36	6918.4	4052.87	2865.53
BEN	2013	0.32	215.56	137.71	77.85	6849.16	4049.78	2799.37
BEN	2014	0.33	213.43	137.59	75.83	6750.27	4050.99	2699.28
BEN	2015	0.33	214.76	137.65	77.11	6736.35	4051.12	2685.23
BEN	2016	0.34	210.27	137.65	72.62	6590.45	4050.59	2539.85
BEN	2017	0.35	206.2	137.61	68.59	6420.77	4050.29	2370.48
BEN	2018	0.35	200.15	114.28	85.87	6167.52	3662.86	2504.66
BEN	2019	0.36	197.61	109.28	88.33	6036.41	3510.92	2525.48
BEN	2020	0.37	194.34	107.73	86.61	5878.22	3463.9	2414.32
BEN	2021	0.37	190.04	104.16	85.87	5699.63	3359.79	2339.84
BFA	1990	0.13	236.58	208.98	27.59	8938.27	6849.11	2089.16
BFA	1991	0.13	231.72	209	22.72	8714.6	6836.88	1877.72
BFA	1992	0.14	229.29	208.64	20.65	8558.81	6826.16	1732.65
BFA	1993	0.14	227.99	208.69	19.3	8443.31	6815.23	1628.07
BFA	1994	0.14	227.04	208.79	18.25	8354.92	6823.2	1531.72
BFA	1995	0.15	226.15	208.79	17.36	8270.8	6813.22	1457.57
BFA	1996	0.15	225.34	208.66	16.68	8230.08	6820.06	1410.02
BFA	1997	0.15	224.57	208.59	15.97	8130.47	6741	1389.47
BFA	1998	0.16	223.21	207.03	16.19	8013.7	6590.18	1423.53
BFA	1999	0.16	223.4	205.42	17.98	7937.35	6448.88	1488.48
BFA	2000	0.17	226.34	197.65	28.69	7972.57	6073.89	1898.68
BFA	2001	0.17	224.17	197.91	26.25	7847.44	6077.02	1770.42
BFA	2002	0.18	226.33	198.45	27.88	7839.37	6042.15	1797.22
BFA	2003	0.18	221.64	197.81	23.82	7676.5	6094.02	1582.48
BFA	2004	0.19	219.61	198.08	21.53	7569.24	6084	1485.24
BFA	2005	0.19	217.93	197.79	20.14	7487.98	6085.68	1402.31
BFA	2006	0.2	218.15	197.75	20.4	7399.79	6107.78	1292.01
BFA	2007	0.2	214.22	198.65	15.57	7227.37	6068.86	1158.51
BFA	2008	0.21	212.32	197.56	14.75	7079.58	6088.32	991.26
BFA	2009	0.22	210.21	197.93	12.28	6938.91	6047.22	891.69
BFA	2010	0.22	209.33	197.52	11.81	6874.98	6068.97	806.02
BFA	2011	0.23	210.08	196.49	13.59	6848.95	6094.47	754.48
BFA	2012	0.23	210.59	197.06	13.53	6875.54	6089.28	786.26
BFA	2013	0.24	209.76	191.84	17.93	6878.91	6124.52	754.39
BFA	2014	0.24	206.54	185.1	21.44	6787.6	6056.63	730.97
BFA	2015	0.25	208.58	185.88	22.7	6785.22	6072.58	712.64
BFA	2016	0.26	207.17	179.6	27.57	6716.65	6008.46	708.19
BFA	2017	0.26	202.8	179.41	23.39	6539.46	6007.27	532.19
BFA	2018	0.27	197.11	172.65	24.46	6306.39	5892.51	413.89
BFA	2019	0.27	192.72	172.99	19.73	6123.82	5882.18	241.64
BFA	2020	0.28	185.66	152.49	33.17	5809.85	4776.69	1033.15
BFA	2021	0.29	181.71	143.83	37.88	5617.53	4252.91	1364.62
BGD	1990	0.23	314.69	196.75	117.95	11135.3	6090.59	5044.73
BGD	1991	0.24	300.09	191.35	108.74	10737.4	6084	4653.42
BGD	1992	0.25	299.3	185.93	113.37	10606.5	6084.62	4521.85
BGD	1993	0.25	296.93	185.59	111.34	10437	6058.1	4378.85
BGD	1994	0.26	294.03	179.04	114.99	10231.5	6018.27	4213.2
BGD	1995	0.27	297.83	177.68	120.15	10175.9	6006.51	4169.42
BGD	1996	0.27	294.34	173.34	121	9948.45	5890.93	4057.52
BGD	1997	0.28	290.73	153.01	137.72	9707.99	4849.6	4858.39
BGD	1998	0.28	286.46	146.81	139.65	9436.2	4328.33	5107.87
BGD	1999	0.29	295.06	140.01	155.04	9363.85	4136.21	5227.65
BGD	2000	0.3	298.3	139.12	159.18	9292.42	4075.83	5216.59
BGD	2001	0.3	296.28	138.28	158.01	9120.15	4064.19	5055.96
BGD	2002	0.31	300.77	138.29	162.48	9049.81	4053.41	4996.4
BGD	2003	0.31	297.83	137.56	160.26	8888.81	4051.54	4837.26
BGD	2004	0.32	287.5	137.64	149.86	8639.9	4049.9	4589.99
BGD	2005	0.33	282.19	137.66	144.53	8488.55	4053.01	4435.53
BGD	2006	0.34	282.84	137.56	145.29	8385.41	4051.21	4334.21
BGD	2007	0.34	281.3	137.53	143.77	8234.17	4050.89	4183.28
BGD	2008	0.35	272.76	112.31	160.45	7957.83	3635.02	4322.81
BGD	2009	0.36	265.41	109.09	156.32	7682.9	3504.32	4178.58
BGD	2010	0.37	262.2	104.29	157.91	7486.87	3364.86	4122.01
BGD	2011	0.38	234.8	103.28	131.51	7027.12	3311.4	3715.72
BGD	2012	0.39	211.3	103.2	108.1	6579.08	3278.43	3300.65
BGD	2013	0.4	205.94	96.24	109.7	6349.07	3010.49	3338.59
BGD	2014	0.41	210.08	95.36	114.72	6254.66	2933.07	3321.59
BGD	2015	0.43	204.22	92.03	112.19	6087.78	2712.71	3375.07
BGD	2016	0.44	202.54	90.34	112.19	5988.97	2613.83	3375.14
BGD	2017	0.45	209.35	87.6	121.76	5959.69	2501.99	3457.7
BGD	2018	0.46	203.64	81.98	121.66	5690.43	2420.84	3269.59
BGD	2019	0.47	197.86	76.28	121.58	5461.92	2267.62	3194.3
BGD	2020	0.48	189.88	73.22	116.66	5153.44	2189.68	2963.76
BGD	2021	0.49	190.91	70.79	120.11	5114.68	2059.14	3055.54
BGR	1990	0.63	215.36	16.98	198.37	4179.89	448.26	3731.63
BGR	1991	0.64	199.15	16.23	182.93	4038.31	427.37	3610.94
BGR	1992	0.65	193.25	15.9	177.34	4026.15	420.66	3605.49
BGR	1993	0.66	210.27	15.12	195.15	4207.41	384.29	3823.12
BGR	1994	0.67	217.27	13.83	203.44	4330.12	354.77	3975.34
BGR	1995	0.67	216.41	13.45	202.96	4304.48	346.61	3957.87
BGR	1996	0.68	216.89	13.28	203.6	4335.31	337.46	3997.85
BGR	1997	0.68	221.52	13.19	208.33	4505.38	337.24	4168.13
BGR	1998	0.68	210.58	13.24	197.34	4270.62	337.3	3933.32
BGR	1999	0.68	199.92	13.23	186.7	4059.32	336.42	3722.9
BGR	2000	0.68	197.91	13.11	184.81	3964.87	335.83	3629.04
BGR	2001	0.69	193.9	13.11	180.79	3854.91	335.03	3519.88
BGR	2002	0.69	190.2	13.11	177.08	3760.96	335.47	3425.49
BGR	2003	0.7	181.41	13.1	168.31	3628.25	334.73	3293.52
BGR	2004	0.7	171.07	13.1	157.97	3490.97	335.33	3155.64
BGR	2005	0.7	164.81	13.11	151.7	3395.56	334.62	3060.94
BGR	2006	0.71	157.78	13.09	144.69	3272.28	334.83	2937.45
BGR	2007	0.71	147.03	13.08	133.95	3045.25	334.98	2710.27
BGR	2008	0.72	135.6	13.1	122.5	2826.09	334.64	2491.45
BGR	2009	0.72	127.57	13.08	114.48	2700.21	313.18	2387.03
BGR	2010	0.73	121.84	10.84	111	2573.73	274.02	2299.71
BGR	2011	0.74	115.47	9.19	106.28	2430.93	230.15	2200.79
BGR	2012	0.74	109.07	8.58	100.5	2287.67	205.26	2082.41
BGR	2013	0.74	103.65	8.31	95.34	2169.56	202.4	1967.16
BGR	2014	0.75	103.38	7.93	95.45	2158.57	191.36	1967.2
BGR	2015	0.75	99.29	7.8	91.49	2060.25	191.13	1869.11
BGR	2016	0.75	93.58	7.67	85.91	1960.75	193.26	1767.49
BGR	2017	0.76	88.97	7.66	81.32	1873.05	189.75	1683.3
BGR	2018	0.76	83.8	7.54	76.26	1770.18	189.75	1580.44
BGR	2019	0.76	78.64	7.11	71.53	1666.28	191.18	1475.1
BGR	2020	0.77	74.22	7.12	67.1	1589.04	192.05	1396.99
BGR	2021	0.77	76.82	7.04	69.78	1624.43	189.7	1434.73
BHR	1990	0.58	317.81	23.33	294.48	6495.56	610.73	5884.83
BHR	1991	0.59	317.09	22.91	294.18	6484.62	604.25	5880.37
BHR	1992	0.6	310.57	22.58	288	6369.85	596.53	5773.31
BHR	1993	0.6	298.16	22.22	275.94	6176.54	584.95	5591.59
BHR	1994	0.61	300.14	21.46	278.69	6168.24	577.18	5591.06
BHR	1995	0.61	307.57	20.54	287.02	6211.15	539.97	5671.18
BHR	1996	0.62	308.11	19.41	288.7	6152.05	508.41	5643.64
BHR	1997	0.62	311.88	17.9	293.98	6160.44	472.23	5688.21
BHR	1998	0.63	309.87	17.28	292.6	6086.01	449.2	5636.81
BHR	1999	0.64	300.6	16.64	283.96	5898.13	437.56	5460.57
BHR	2000	0.65	294.44	16.2	278.23	5771.25	429.14	5342.11
BHR	2001	0.66	290.17	15.53	274.64	5686	410.58	5275.42
BHR	2002	0.66	287.67	14.39	273.28	5589.32	369.63	5219.69
BHR	2003	0.67	299.04	13.91	285.12	5699.75	356.7	5343.05
BHR	2004	0.67	301.22	13.57	287.65	5659.48	348.75	5310.73
BHR	2005	0.68	298.46	13.21	285.25	5518.74	337.91	5180.83
BHR	2006	0.69	279.6	13.12	266.48	5170.97	335	4835.97
BHR	2007	0.69	260.07	13.1	246.97	4804.95	334.96	4469.99
BHR	2008	0.7	242.2	13.09	229.11	4464.65	335.08	4129.57
BHR	2009	0.7	229.39	13.09	216.3	4184.42	334.76	3849.66
BHR	2010	0.71	229.96	13.1	216.86	4067.76	335.14	3732.62
BHR	2011	0.71	223.12	13.1	210.02	3924.3	334.67	3589.63
BHR	2012	0.71	212.58	13.09	199.49	3770.49	334.97	3435.52
BHR	2013	0.71	194.32	13.08	181.24	3557.83	334.57	3223.26
BHR	2014	0.72	161.4	13.11	148.29	3216.69	334.46	2882.23
BHR	2015	0.72	159.81	13.11	146.71	3201.62	326.8	2874.82
BHR	2016	0.72	161.74	13.11	148.63	3202.6	312.48	2890.12
BHR	2017	0.73	157.74	11.75	145.99	3119.8	275.37	2844.43
BHR	2018	0.74	151.02	9.15	141.87	2996.15	227.86	2768.29
BHR	2019	0.74	148.04	8.3	139.73	2929.04	204.75	2724.3
BHR	2020	0.75	147.99	7.8	140.19	2905.15	191.74	2713.41
BHR	2021	0.75	150.65	7.63	143.02	2938.15	189.03	2749.12
BHS	1990	0.69	55.09	13.11	41.98	1529.39	334.85	1194.54
BHS	1991	0.69	54.39	13.12	41.27	1485.01	334.65	1150.36
BHS	1992	0.69	53.9	13.11	40.79	1446.48	335.04	1111.44
BHS	1993	0.69	53.92	13.11	40.81	1430.57	335.3	1095.27
BHS	1994	0.71	53.93	13.09	40.84	1418.11	335.19	1082.92
BHS	1995	0.72	53.8	13.1	40.7	1411.41	334.44	1076.97
BHS	1996	0.73	54.39	11.72	42.67	1418.9	275.45	1143.45
BHS	1997	0.73	52.55	9.1	43.45	1379.64	228.2	1151.44
BHS	1998	0.74	51.83	8.49	43.34	1363.02	206.51	1156.51
BHS	1999	0.74	52.74	8.5	44.24	1382.37	201.03	1181.34
BHS	2000	0.74	51.61	8.36	43.26	1354.48	201.13	1153.34
BHS	2001	0.74	50.66	8.34	42.31	1329.28	201.1	1128.18
BHS	2002	0.75	47.53	7.8	39.73	1253.68	191.66	1062.02
BHS	2003	0.75	46.91	7.83	39.09	1211.03	191.37	1019.66
BHS	2004	0.75	45.2	7.68	37.52	1182.68	190.11	992.56
BHS	2005	0.76	42.43	7.52	34.92	1144.93	191.89	953.04
BHS	2006	0.76	41.18	7.57	33.61	1131.93	188.94	943
BHS	2007	0.76	39.17	7.14	32.03	1087.37	189.93	897.44
BHS	2008	0.77	39.29	7.13	32.16	1086.49	188.3	898.18
BHS	2009	0.77	39.77	7.06	32.71	1085.4	190.38	895.02
BHS	2010	0.77	39.41	6.85	32.56	1075.99	191.64	884.35
BHS	2011	0.78	39	6.87	32.13	1069.56	188.94	880.62
BHS	2012	0.78	39.26	6.87	32.39	1080.74	188.92	891.82
BHS	2013	0.78	39.11	6.82	32.29	1085.76	184.81	900.95
BHS	2014	0.79	41.05	6.8	34.25	1115.89	173.8	942.09
BHS	2015	0.79	40.46	6.8	33.67	1097.46	165.16	932.3
BHS	2016	0.79	40.71	6.58	34.12	1099.95	159.23	940.73
BHS	2017	0.8	39.04	6.59	32.45	1067.37	158.41	908.96
BHS	2018	0.8	38.07	6.59	31.48	1043.57	158.82	884.75
BHS	2019	0.8	37.53	6.57	30.96	1031.13	157.86	873.27
BHS	2020	0.8	36.79	6.57	30.22	1021.48	157.97	863.51
BHS	2021	0.81	35.36	6.56	28.8	984.84	157.78	827.06
BIH	1990	0.54	210.29	28.14	182.16	4837.92	735.43	4102.49
BIH	1991	0.54	219.25	28.48	190.77	5073.42	735.75	4337.67
BIH	1992	0.54	219.57	28.57	191	5070.77	757.54	4313.23
BIH	1993	0.54	223.78	28.95	194.83	5121.85	739.88	4381.96
BIH	1994	0.53	222.01	30.17	191.83	5074.47	775.22	4299.24
BIH	1995	0.53	217.74	29.25	188.48	4980.44	818.04	4162.4
BIH	1996	0.55	211.29	27.92	183.37	4793.8	731.03	4062.76
BIH	1997	0.56	202.58	25.71	176.87	4544.15	673.44	3870.71
BIH	1998	0.58	188.2	23.54	164.66	4208.4	621.56	3586.84
BIH	1999	0.6	182.29	22.59	159.71	4007.01	595.84	3411.17
BIH	2000	0.61	175.19	21.61	153.58	3877.59	570.61	3306.98
BIH	2001	0.62	164.7	19.28	145.42	3665.48	503.47	3162.01
BIH	2002	0.63	157.55	17.36	140.18	3550.05	449.51	3100.53
BIH	2003	0.64	148.92	16.5	132.42	3352.46	438.69	2913.76
BIH	2004	0.65	141.58	16.33	125.26	3189.17	429.76	2759.41
BIH	2005	0.65	138.82	15.62	123.2	3150.08	412.77	2737.31
BIH	2006	0.66	132.41	15.06	117.35	3017.52	393.21	2624.31
BIH	2007	0.67	135.97	14.35	121.61	3073.14	366.24	2706.9
BIH	2008	0.67	127.46	13.55	113.91	2857.69	347.49	2510.21
BIH	2009	0.68	125.47	13.24	112.22	2779.44	338.3	2441.14
BIH	2010	0.68	120.77	13.12	107.65	2672.51	336.14	2336.38
BIH	2011	0.69	118.75	13.11	105.64	2606.72	336.48	2270.24
BIH	2012	0.69	115.29	13.11	102.18	2508.33	334.96	2173.37
BIH	2013	0.69	114.54	13.1	101.44	2481.1	334.7	2146.4
BIH	2014	0.7	113.04	13.1	99.94	2432.71	335.36	2097.35
BIH	2015	0.7	113.77	13.11	100.66	2447.73	335.41	2112.32
BIH	2016	0.7	108.02	13.1	94.92	2338.65	334.94	2003.71
BIH	2017	0.71	103.14	13.1	90.03	2224.79	334.85	1889.94
BIH	2018	0.71	97.9	13.11	84.78	2115.66	335.52	1780.14
BIH	2019	0.72	97.35	13.1	84.24	2103.9	334.41	1769.49
BIH	2020	0.72	96.49	13.09	83.4	2049.57	326.25	1723.32
BIH	2021	0.72	90.99	13.09	77.91	1941.11	313.7	1627.41
BLR	1990	0.62	155.36	19.27	136.09	3305.19	504.99	2800.21
BLR	1991	0.63	156.08	18.13	137.96	3357.78	471.55	2886.23
BLR	1992	0.63	157.81	17.16	140.65	3412.72	447.79	2964.93
BLR	1993	0.64	171.14	16.52	154.62	3709.05	435.26	3273.8
BLR	1994	0.64	171.82	16.17	155.65	3726.67	428.86	3297.82
BLR	1995	0.65	175.53	15.86	159.66	3828.49	420.62	3407.87
BLR	1996	0.65	170.63	15.92	154.72	3714.25	420.56	3293.69
BLR	1997	0.66	170.91	15.48	155.42	3701.13	411.79	3289.35
BLR	1998	0.66	170.5	15.57	154.92	3696.15	410.62	3285.53
BLR	1999	0.66	172.08	15.07	157.01	3728.22	388.06	3340.16
BLR	2000	0.66	160.25	14.3	145.95	3476.79	369.77	3107.02
BLR	2001	0.67	161.04	13.48	147.56	3499.9	347.5	3152.41
BLR	2002	0.68	161.91	13.19	148.72	3495.28	337.53	3157.75
BLR	2003	0.68	148.06	13.1	134.96	3203.44	335.46	2867.98
BLR	2004	0.69	136.79	13.09	123.7	2961.32	334.58	2626.74
BLR	2005	0.7	133.46	13.09	120.37	2907.79	334.98	2572.81
BLR	2006	0.71	125.53	13.12	112.42	2726.98	335.18	2391.8
BLR	2007	0.71	117.83	13.09	104.74	2527.73	334.69	2193.03
BLR	2008	0.72	116.06	13.1	102.96	2479.81	334.57	2145.24
BLR	2009	0.73	115.48	11.87	103.61	2462.76	292.58	2170.18
BLR	2010	0.73	113.38	9.18	104.2	2418.16	226.05	2192.11
BLR	2011	0.74	110.79	8.58	102.21	2357.66	204.61	2153.06
BLR	2012	0.74	96.98	8.35	88.63	2012.32	202.35	1809.97
BLR	2013	0.75	93.1	7.78	85.32	1910.28	191.65	1718.63
BLR	2014	0.75	87.36	7.65	79.71	1781.7	189.25	1592.45
BLR	2015	0.76	80.88	7.52	73.36	1627.34	191.58	1435.76
BLR	2016	0.76	78	7.05	70.94	1562.62	191.18	1371.45
BLR	2017	0.77	73.78	7.02	66.76	1488.78	191.57	1297.2
BLR	2018	0.78	71.97	6.88	65.09	1456.57	189.58	1266.99
BLR	2019	0.78	69.76	6.86	62.9	1407.61	188.76	1218.85
BLR	2020	0.78	64.22	6.85	57.37	1292.41	188.04	1104.37
BLR	2021	0.78	68.78	6.83	61.95	1389.7	184.34	1205.36
BLZ	1990	0.42	90.8	90.8	0	2653.29	2653.29	0
BLZ	1991	0.43	89.73	89.73	0	2601.89	2601.89	0
BLZ	1992	0.44	87.89	87.89	0	2541.16	2541.16	0
BLZ	1993	0.46	87.86	87.26	0.59	2510.82	2462.72	48.11
BLZ	1994	0.47	87.83	78.64	9.19	2490.42	2337.48	152.94
BLZ	1995	0.48	90.44	75.05	15.39	2532.42	2271.08	261.34
BLZ	1996	0.48	96.11	73.08	23.03	2618.72	2193.72	425
BLZ	1997	0.49	102.55	73.3	29.25	2739.14	2151.28	587.86
BLZ	1998	0.49	107.99	71.02	36.97	2834.78	2056.02	778.77
BLZ	1999	0.5	113.25	71.11	42.14	2926.72	2050.55	876.17
BLZ	2000	0.5	116.7	69.02	47.68	2971.07	1937.07	1034
BLZ	2001	0.5	105.15	68.83	36.32	2734.97	1920.6	814.37
BLZ	2002	0.51	96.61	66.05	30.56	2551.09	1827.94	723.15
BLZ	2003	0.51	93.24	64.93	28.31	2451.01	1749.35	701.66
BLZ	2004	0.52	90.53	61.94	28.58	2371.27	1623.57	747.7
BLZ	2005	0.53	87.07	32.01	55.07	2288.14	877.98	1410.16
BLZ	2006	0.53	83.47	28.86	54.62	2188.88	777.38	1411.5
BLZ	2007	0.54	78.43	28.4	50.04	2062.83	736.2	1326.63
BLZ	2008	0.55	72.28	27.93	44.35	1925.28	731.07	1194.22
BLZ	2009	0.55	70.91	27.46	43.45	1883.95	722.59	1161.37
BLZ	2010	0.56	69.91	26.7	43.21	1848.73	701.82	1146.91
BLZ	2011	0.56	68.79	25.61	43.18	1832.01	671.75	1160.25
BLZ	2012	0.57	66.58	24.75	41.83	1803.97	649.84	1154.14
BLZ	2013	0.57	66.97	23.99	42.98	1821.27	628.23	1193.04
BLZ	2014	0.58	68.22	23.59	44.63	1841.91	620.89	1221.02
BLZ	2015	0.58	68.7	23.22	45.48	1854.01	610.69	1243.32
BLZ	2016	0.59	66.78	22.89	43.89	1820.74	604.32	1216.41
BLZ	2017	0.59	65.72	22.58	43.15	1781.7	595.97	1185.72
BLZ	2018	0.6	65.24	22.31	42.93	1755.37	586.22	1169.15
BLZ	2019	0.6	63.6	22.23	41.37	1709.05	584.25	1124.8
BLZ	2020	0.61	60.43	21.5	38.93	1658.58	570.74	1087.85
BLZ	2021	0.61	57.91	21.56	36.35	1570.01	569.65	1000.36
BMU	1990	0.7	29.58	13.1	16.48	641.7	334.64	307.06
BMU	1991	0.7	28.4	13.09	15.31	612.86	334.64	278.22
BMU	1992	0.7	26.89	13.1	13.8	580.17	334.75	245.42
BMU	1993	0.71	24.55	13.09	11.46	535.27	335.13	200.14
BMU	1994	0.71	23.82	13.1	10.73	517.81	334.94	182.86
BMU	1995	0.71	22.92	13.09	9.83	498.58	334.34	164.24
BMU	1996	0.72	22.09	13.1	8.99	481.31	334.32	146.99
BMU	1997	0.72	21.01	13.1	7.91	456.72	326.14	130.58
BMU	1998	0.73	20.46	12.88	7.58	442.13	295.88	146.24
BMU	1999	0.73	20.17	10.79	9.38	436.22	271.01	165.21
BMU	2000	0.74	19.34	9.18	10.15	417.88	226.18	191.7
BMU	2001	0.74	18.07	8.32	9.76	392.96	202.29	190.67
BMU	2002	0.75	16.51	7.83	8.69	360.88	192.05	168.83
BMU	2003	0.75	15.19	7.66	7.53	336.23	190.03	146.2
BMU	2004	0.76	14.16	7.56	6.6	316.16	188.97	127.19
BMU	2005	0.76	13.11	7.14	5.97	296.6	189.84	106.75
BMU	2006	0.77	12	7.04	4.96	275.33	189.52	85.82
BMU	2007	0.78	10.79	6.89	3.9	251.08	189.69	61.39
BMU	2008	0.78	9.6	6.86	2.74	226.43	188.31	38.12
BMU	2009	0.78	8.65	6.84	1.81	207.01	184.49	22.52
BMU	2010	0.79	8.09	6.8	1.28	194.02	173.86	20.16
BMU	2011	0.79	7.92	6.59	1.33	191.28	158.85	32.42
BMU	2012	0.8	7.68	6.59	1.09	186.96	158.32	28.64
BMU	2013	0.8	7.46	6.57	0.89	182.31	157.77	24.54
BMU	2014	0.8	7.17	6.56	0.61	176.76	157.74	19.01
BMU	2015	0.81	7.03	6.55	0.48	174.53	155.68	18.85
BMU	2016	0.81	6.94	6.56	0.38	172.86	155.66	17.19
BMU	2017	0.81	6.86	6.55	0.3	172.66	149.11	23.55
BMU	2018	0.81	6.9	6.28	0.62	174.04	148.79	25.25
BMU	2019	0.82	7.02	6.16	0.86	177.14	142.15	34.99
BMU	2020	0.82	6.89	6.14	0.76	175.45	142.47	32.98
BMU	2021	0.82	6.88	6.11	0.77	174.99	136.93	38.06
BOL	1990	0.42	230.38	91.91	138.46	7320.25	2721.89	4598.37
BOL	1991	0.43	225.36	92.16	133.2	7088.51	2706.07	4382.44
BOL	1992	0.43	219.54	90.36	129.18	6838.78	2630	4208.77
BOL	1993	0.44	214.01	90.5	123.5	6596.83	2610.15	3986.68
BOL	1994	0.45	206.81	87.65	119.16	6325.77	2499.13	3826.64
BOL	1995	0.45	201.22	87.65	113.56	6095.94	2512.77	3583.17
BOL	1996	0.46	193.63	82.51	111.12	5831.54	2417.2	3414.34
BOL	1997	0.47	188.67	78.75	109.91	5623.48	2336.38	3287.1
BOL	1998	0.47	181.58	76.49	105.09	5371.32	2261.31	3110.01
BOL	1999	0.48	175.55	75.24	100.31	5150.04	2239.66	2910.39
BOL	2000	0.49	169.29	73.37	95.92	4927.87	2190.91	2736.96
BOL	2001	0.49	163.18	71.22	91.95	4713.16	2065.71	2647.45
BOL	2002	0.5	159.26	69.32	89.94	4551.11	1953.7	2597.4
BOL	2003	0.5	154.83	68.6	86.23	4382.41	1913.63	2468.78
BOL	2004	0.51	150.49	66.2	84.28	4221.26	1837.47	2383.79
BOL	2005	0.51	147.15	64.8	82.35	4084.24	1759.86	2324.38
BOL	2006	0.52	141.74	62.71	79.03	3895.61	1654.97	2240.64
BOL	2007	0.52	135.23	36.4	98.84	3680.92	1086.02	2594.9
BOL	2008	0.53	127.36	31.32	96.04	3435.11	888.97	2546.14
BOL	2009	0.53	119.9	28.94	90.96	3203.73	802.47	2401.27
BOL	2010	0.54	114.38	28.53	85.85	3023.41	757.5	2265.91
BOL	2011	0.54	110.44	28.33	82.1	2886.75	735.9	2150.85
BOL	2012	0.55	107.05	27.93	79.12	2770.9	730.8	2040.09
BOL	2013	0.55	103.77	27.49	76.29	2669.89	720.52	1949.37
BOL	2014	0.56	100.84	26.65	74.19	2573.89	702.75	1871.13
BOL	2015	0.57	97.56	24.78	72.78	2477.97	649.96	1828.02
BOL	2016	0.57	93.99	24.17	69.82	2381.79	630.87	1750.92
BOL	2017	0.58	90.94	23.45	67.48	2294.98	620.44	1674.53
BOL	2018	0.59	87.28	23.1	64.17	2188.96	610.86	1578.1
BOL	2019	0.59	83.48	22.94	60.53	2086.18	602.61	1483.57
BOL	2020	0.59	75.16	22.57	52.59	1864.78	596.35	1268.43
BOL	2021	0.6	76.15	22.28	53.87	1896.38	585.12	1311.26
BRA	1990	0.5	101.52	68.82	32.7	2950.31	1928.29	1022.02
BRA	1991	0.5	95.28	66.02	29.26	2777.91	1822.73	955.19
BRA	1992	0.51	92.04	66.08	25.96	2668.29	1813.93	854.37
BRA	1993	0.51	90.67	64.97	25.7	2594.17	1759.63	834.54
BRA	1994	0.52	86.25	62.74	23.51	2460.42	1661.16	799.26
BRA	1995	0.52	82.41	62.01	20.4	2349.91	1628.28	721.63
BRA	1996	0.52	78.73	36.81	41.92	2235.29	1041.04	1194.25
BRA	1997	0.53	74.43	31.18	43.25	2116.33	838.41	1277.92
BRA	1998	0.53	71.89	29.1	42.79	2041.03	811.05	1229.99
BRA	1999	0.54	68.73	28.76	39.97	1957.48	751.27	1206.21
BRA	2000	0.54	65.35	28.47	36.88	1865.25	735.95	1129.3
BRA	2001	0.55	63.19	27.92	35.28	1794.81	730.11	1064.7
BRA	2002	0.55	61.45	27.5	33.94	1728.53	720.06	1008.47
BRA	2003	0.56	59.79	26.71	33.08	1670.89	698.76	972.13
BRA	2004	0.56	57.93	25.89	32.05	1612.7	676.89	935.81
BRA	2005	0.57	54.29	24.62	29.67	1518.31	649.57	868.74
BRA	2006	0.58	52.57	24.19	28.37	1463.7	628.92	834.78
BRA	2007	0.58	50.59	23.55	27.04	1405.05	620.95	784.1
BRA	2008	0.59	48.7	22.92	25.78	1349.46	602.29	747.17
BRA	2009	0.59	47.44	22.55	24.89	1303.18	596.13	707.05
BRA	2010	0.6	45.8	22.25	23.54	1245.15	585.69	659.46
BRA	2011	0.61	43.62	21.59	22.03	1179.11	572.91	606.2
BRA	2012	0.61	40	20.47	19.53	1080.62	538.07	542.55
BRA	2013	0.62	36.84	19.41	17.43	992.6	500.9	491.69
BRA	2014	0.62	33.88	19.17	14.7	907.41	498.69	408.72
BRA	2015	0.63	32.45	18.11	14.34	861.5	473.8	387.7
BRA	2016	0.63	32.01	17.04	14.97	846.43	446.68	399.75
BRA	2017	0.64	30.43	16.58	13.84	803.65	437.02	366.63
BRA	2018	0.64	29.35	16.58	12.77	777.51	441.29	336.23
BRA	2019	0.65	28.61	16.28	12.33	752.65	428.22	324.43
BRA	2020	0.65	27	15.97	11.02	714.25	420.62	293.63
BRA	2021	0.65	26.45	15.89	10.55	707.86	421.33	286.53
BRB	1990	0.65	69.55	15.65	53.9	1650.46	412.36	1238.1
BRB	1991	0.66	67.76	15.52	52.24	1621.59	411.94	1209.65
BRB	1992	0.66	68.24	15.08	53.16	1609.44	388.48	1220.96
BRB	1993	0.67	67.11	13.92	53.19	1557.6	357.18	1200.42
BRB	1994	0.67	66.96	13.55	53.41	1577.36	349.01	1228.35
BRB	1995	0.68	66.47	13.29	53.17	1576.78	338.22	1238.56
BRB	1996	0.68	65.95	13.25	52.71	1571.04	336.92	1234.12
BRB	1997	0.68	65.66	13.24	52.42	1566.29	337.47	1228.82
BRB	1998	0.68	62.53	13.27	49.25	1516.01	336.74	1179.27
BRB	1999	0.68	59.9	13.21	46.69	1464.6	337.55	1127.05
BRB	2000	0.68	60.2	13.12	47.08	1453.89	334.95	1118.94
BRB	2001	0.68	56.99	13.13	43.86	1344.11	335.17	1008.93
BRB	2002	0.69	57.59	13.12	44.47	1366.88	335.34	1031.54
BRB	2003	0.69	59.58	13.11	46.47	1446.41	334.95	1111.46
BRB	2004	0.7	56.91	13.08	43.83	1348.26	334.88	1013.39
BRB	2005	0.7	54.3	13.1	41.2	1317.2	335.18	982.02
BRB	2006	0.7	53.57	13.09	40.48	1314.4	334.8	979.6
BRB	2007	0.71	52.78	13.11	39.67	1278.56	335.35	943.2
BRB	2008	0.71	51.33	13.1	38.23	1244.52	334.83	909.68
BRB	2009	0.71	48.78	13.11	35.67	1207.12	334.87	872.25
BRB	2010	0.72	47.92	13.09	34.82	1199.11	334.29	864.82
BRB	2011	0.72	48.7	13.1	35.6	1237.49	325.2	912.3
BRB	2012	0.72	48.39	13.11	35.29	1191.06	315.32	875.74
BRB	2013	0.73	49.88	11.96	37.92	1234.67	293.78	940.89
BRB	2014	0.73	51.27	11.68	39.59	1268.97	278.33	990.64
BRB	2015	0.73	51.77	10.33	41.44	1282.82	246.11	1036.71
BRB	2016	0.73	51.45	9.09	42.36	1274.56	227.36	1047.19
BRB	2017	0.74	50.91	9.12	41.78	1264.64	224.6	1040.04
BRB	2018	0.74	50.66	8.54	42.11	1255.79	207.13	1048.66
BRB	2019	0.74	51.84	8.34	43.5	1275.24	203.66	1071.58
BRB	2020	0.74	48.68	7.95	40.73	1219.01	193.82	1025.19
BRB	2021	0.75	46.84	7.79	39.05	1181.85	191.46	990.38
BRN	1990	0.67	30.45	14.39	16.06	685.45	369.08	316.37
BRN	1991	0.67	28.53	13.49	15.05	645.44	347.95	297.49
BRN	1992	0.68	26.71	13.21	13.51	604.82	338.82	266.01
BRN	1993	0.68	25.02	13.1	11.92	567.36	335.58	231.78
BRN	1994	0.69	23.2	13.11	10.09	528.49	335.18	193.31
BRN	1995	0.69	21.74	13.08	8.67	496.88	335.44	161.45
BRN	1996	0.7	20.37	13.11	7.26	469.51	335.49	134.02
BRN	1997	0.7	19.64	13.08	6.56	453.7	335.11	118.59
BRN	1998	0.71	19.55	13.1	6.45	446.96	335.3	111.66
BRN	1999	0.71	19.29	13.13	6.16	437.71	335.18	102.53
BRN	2000	0.72	18.55	13.1	5.45	425.35	326.04	99.31
BRN	2001	0.73	17.98	11.73	6.24	413.55	276.04	137.51
BRN	2002	0.74	17.9	9.24	8.65	410.09	222.79	187.3
BRN	2003	0.74	18.03	8.55	9.48	411.73	202.19	209.54
BRN	2004	0.75	17.86	7.78	10.08	407.9	188.71	219.19
BRN	2005	0.75	16.78	7.65	9.13	392.37	191.31	201.06
BRN	2006	0.76	15.54	7.51	8.03	366.9	192.65	174.24
BRN	2007	0.76	14.37	7.54	6.83	338.1	192.18	145.93
BRN	2008	0.77	12.98	7.17	5.81	305.04	190.59	114.45
BRN	2009	0.77	12.06	7.01	5.06	282.62	189.91	92.71
BRN	2010	0.77	11.71	6.9	4.81	274.13	188.42	85.71
BRN	2011	0.78	12.39	6.88	5.52	288.17	189.91	98.26
BRN	2012	0.78	14.05	6.82	7.22	322.93	188.94	133.99
BRN	2013	0.78	16.86	6.85	10.01	376.58	184.65	191.93
BRN	2014	0.79	18.92	6.81	12.11	419.28	174.59	244.69
BRN	2015	0.79	19.94	6.82	13.12	444.81	160.36	284.45
BRN	2016	0.79	20.91	6.57	14.34	462.88	159.33	303.55
BRN	2017	0.8	20.33	6.59	13.74	461.41	158.83	302.58
BRN	2018	0.8	18.79	6.58	12.2	447.85	157.78	290.07
BRN	2019	0.8	18.16	6.59	11.57	438.8	157.75	281.05
BRN	2020	0.81	14.63	6.58	8.05	379.8	157.84	221.96
BRN	2021	0.81	15.72	6.55	9.17	409.47	155.6	253.87
BTN	1990	0.22	234.44	197.04	37.4	8136.6	6098.01	2038.59
BTN	1991	0.22	231.28	197.54	33.73	7981.64	6113.7	1867.95
BTN	1992	0.23	229.43	196.46	32.97	7907.43	6102.12	1805.31
BTN	1993	0.24	228.95	191.98	36.97	7890.02	6077.23	1812.79
BTN	1994	0.24	225.72	185.85	39.87	7681.37	6050.61	1630.76
BTN	1995	0.25	223.2	186.37	36.83	7506	6064.62	1441.38
BTN	1996	0.26	216.63	178.71	37.92	7229.95	6009.37	1220.58
BTN	1997	0.27	215.04	172.71	42.32	7134.36	5896	1238.36
BTN	1998	0.28	209.2	152.34	56.86	6835.01	4776.53	2058.48
BTN	1999	0.29	201.55	140.22	61.32	6457.63	4162.72	2294.91
BTN	2000	0.3	200.98	139.06	61.92	6447.35	4062.61	2384.74
BTN	2001	0.31	195.09	138.47	56.62	6193.66	4079.24	2114.42
BTN	2002	0.32	188.69	137.61	51.07	5935.11	4052.21	1882.89
BTN	2003	0.33	183.9	137.63	46.28	5737.38	4051.13	1686.25
BTN	2004	0.34	177.68	137.62	40.06	5492.01	4052.71	1439.3
BTN	2005	0.35	171.34	118.36	52.98	5235.17	3666.2	1568.97
BTN	2006	0.36	162.67	111.95	50.72	4918.38	3663.76	1254.61
BTN	2007	0.37	152.48	107.51	44.97	4556.27	3459.43	1096.83
BTN	2008	0.38	142.52	103.58	38.95	4201.96	3323.36	878.6
BTN	2009	0.39	134.83	102.95	31.87	3910.51	3276.73	633.78
BTN	2010	0.4	130.53	99.87	30.66	3732.43	3129.74	602.69
BTN	2011	0.41	128.65	95.45	33.2	3631.22	2950.36	680.87
BTN	2012	0.42	128.19	93.86	34.33	3574.45	2864.65	709.8
BTN	2013	0.43	127.44	92.26	35.18	3514.94	2701.8	813.14
BTN	2014	0.43	127.39	90.41	36.98	3478	2628.41	849.59
BTN	2015	0.44	126.17	90.36	35.81	3415.52	2616.15	799.37
BTN	2016	0.45	123.63	87.84	35.79	3316.14	2507.48	808.66
BTN	2017	0.45	118.92	87.37	31.54	3160.26	2471.38	688.88
BTN	2018	0.46	112.79	82.69	30.09	2972.25	2417.15	555.09
BTN	2019	0.46	105.19	78.87	26.32	2753.56	2325.31	428.24
BTN	2020	0.47	91.48	76.41	15.07	2390.34	2318.3	72.04
BTN	2021	0.47	102.98	76.35	26.63	2652.36	2264	388.35
BWA	1990	0.42	221.91	93.78	128.13	6246.96	2859.45	3387.51
BWA	1991	0.43	215.04	91.69	123.35	6046.46	2708.1	3338.36
BWA	1992	0.44	210.14	90.51	119.63	5894.64	2610.35	3284.29
BWA	1993	0.45	205.25	87.72	117.53	5737.54	2500.58	3236.97
BWA	1994	0.46	199.89	82.64	117.26	5585.89	2417.34	3168.55
BWA	1995	0.47	193.81	76.49	117.31	5427.52	2319.13	3108.39
BWA	1996	0.48	185.7	75.5	110.2	5227.1	2235.93	2991.18
BWA	1997	0.49	175.64	73.42	102.22	4993.48	2152.75	2840.73
BWA	1998	0.5	164.84	68.83	96.01	4773.37	1942.17	2831.2
BWA	1999	0.5	162.02	66.03	96	4700.11	1836.86	2863.25
BWA	2000	0.51	163	62.52	100.48	4711.21	1669.84	3041.37
BWA	2001	0.52	162.01	60.38	101.63	4674.29	1607.77	3066.52
BWA	2002	0.53	160.19	29.31	130.87	4618.23	876.91	3741.32
BWA	2003	0.54	153.16	29.08	124.08	4444.51	740.04	3704.47
BWA	2004	0.54	142.96	28.16	114.8	4202.29	735.73	3466.56
BWA	2005	0.55	133.23	27.42	105.81	3973.01	720.88	3252.14
BWA	2006	0.56	125.79	26.76	99.03	3832.1	699.28	3132.82
BWA	2007	0.57	127.54	24.83	102.71	3809.37	648.11	3161.26
BWA	2008	0.57	130.74	23.87	106.87	3825.55	629.02	3196.53
BWA	2009	0.58	132.73	23.53	109.2	3825.56	621.13	3204.43
BWA	2010	0.59	134.01	23.21	110.81	3825.9	609.28	3216.62
BWA	2011	0.59	132.48	22.92	109.56	3749.99	604.47	3145.53
BWA	2012	0.6	126.09	22.59	103.51	3575.08	595.3	2979.78
BWA	2013	0.6	122.25	22.32	99.93	3449.16	585.05	2864.11
BWA	2014	0.61	117.12	21.47	95.65	3300.86	570.44	2730.42
BWA	2015	0.62	111.17	20.61	90.56	3141.38	537.64	2603.73
BWA	2016	0.62	100.61	19.12	81.49	2886.95	505.09	2381.86
BWA	2017	0.63	91.38	18.09	73.29	2659.04	466.23	2192.8
BWA	2018	0.63	84.95	17.34	67.61	2483.7	451.71	2031.99
BWA	2019	0.64	81.12	17.25	63.87	2371.99	446.22	1925.78
BWA	2020	0.64	77.14	16.61	60.53	2232.57	438.94	1793.63
BWA	2021	0.64	76.57	16.19	60.38	2247	428.78	1818.22
CAF	1990	0.22	385.47	197.66	187.81	12821.8	6079.5	6742.24
CAF	1991	0.22	385.04	197.54	187.5	12763.4	6088.04	6675.37
CAF	1992	0.22	381.22	196.63	184.59	12608	6060.6	6547.35
CAF	1993	0.23	384.61	196.73	187.88	12645.9	6050.18	6595.73
CAF	1994	0.23	386.31	196.79	189.52	12617.9	6084.88	6532.98
CAF	1995	0.23	385.45	196.94	188.51	12533.8	6119.68	6414.11
CAF	1996	0.23	388.15	191.89	196.26	12603.2	6103.81	6499.36
CAF	1997	0.24	385.98	191.26	194.71	12490.2	6087.08	6403.11
CAF	1998	0.24	386.17	191.81	194.37	12447.2	6112.65	6334.54
CAF	1999	0.24	385.83	192.14	193.69	12393.5	6108.74	6284.78
CAF	2000	0.25	381.85	186.16	195.7	12211.2	6087.27	6123.94
CAF	2001	0.25	377.97	186.53	191.45	12066.9	6064.33	6002.58
CAF	2002	0.25	375.51	186.21	189.3	11930.1	6059.9	5870.18
CAF	2003	0.26	371.26	186.32	184.94	11752	6076.24	5675.74
CAF	2004	0.26	367.42	180.1	187.32	11585.4	6014.62	5570.78
CAF	2005	0.26	363.91	179.68	184.23	11448	6009.29	5438.73
CAF	2006	0.26	362.54	178.07	184.47	11408.1	6002.08	5405.98
CAF	2007	0.27	358.07	178.45	179.63	11281.1	6002.6	5278.47
CAF	2008	0.27	353.36	172.8	180.55	11103.3	5890.22	5213.04
CAF	2009	0.28	350.24	172.5	177.74	10983.8	5891.52	5092.31
CAF	2010	0.28	350.76	152.47	198.29	10952.9	4785.44	6167.42
CAF	2011	0.29	349.63	145.67	203.96	10830	4301.24	6528.73
CAF	2012	0.29	345.6	139.4	206.2	10630	4199.97	6430.08
CAF	2013	0.29	344.98	140.05	204.93	10596.8	4138.32	6458.48
CAF	2014	0.29	341.64	140.14	201.49	10514	4150.32	6363.72
CAF	2015	0.29	340.89	140.08	200.81	10471.2	4185.99	6285.2
CAF	2016	0.29	337.83	139.75	198.08	10330.9	4133.59	6197.36
CAF	2017	0.29	335.36	139.21	196.15	10179.5	4096.42	6083.05
CAF	2018	0.3	333.18	138.76	194.43	10015.9	4084.11	5931.77
CAF	2019	0.3	330.24	138.86	191.38	9841.82	4079.2	5762.62
CAF	2020	0.31	322.32	138.5	183.82	9598.99	4053.97	5545.02
CAF	2021	0.31	317.43	138.32	179.11	9427.06	4068.42	5358.64
CAN	1990	0.78	26.14	6.85	19.29	544.5	189.51	354.99
CAN	1991	0.78	25.37	6.84	18.53	527.2	185.08	342.12
CAN	1992	0.79	24.76	6.81	17.95	513.4	175.39	338.01
CAN	1993	0.79	24.64	6.8	17.84	511.24	164.84	346.4
CAN	1994	0.79	24.21	6.61	17.59	501.92	159.79	342.13
CAN	1995	0.8	23.8	6.6	17.2	493.42	159.26	334.16
CAN	1996	0.8	23.06	6.56	16.5	476.85	157.82	319.03
CAN	1997	0.8	22.35	6.57	15.78	460.12	157.83	302.29
CAN	1998	0.81	21.52	6.55	14.97	441.04	155.28	285.76
CAN	1999	0.81	20.51	6.57	13.94	422.11	150.23	271.88
CAN	2000	0.82	19.24	6.21	13.03	399.81	141.9	257.91
CAN	2001	0.82	18.4	6.13	12.27	386.61	140.42	246.19
CAN	2002	0.82	17.81	6.1	11.71	377.17	136.14	241.03
CAN	2003	0.83	17.14	5.87	11.27	365.98	130.85	235.12
CAN	2004	0.83	16.38	5.88	10.5	352.76	130.91	221.86
CAN	2005	0.83	15.64	5.86	9.78	340.76	130.56	210.19
CAN	2006	0.83	14.31	5.39	8.91	315.62	118.64	196.98
CAN	2007	0.84	12.98	5.41	7.57	289.5	118.88	170.62
CAN	2008	0.84	11.53	4.71	6.82	259.44	102.75	156.69
CAN	2009	0.84	10.11	4.23	5.88	230.75	94.63	136.12
CAN	2010	0.84	8.99	3.84	5.15	208.25	86.32	121.94
CAN	2011	0.85	8.24	3.78	4.46	193.03	87.87	105.16
CAN	2012	0.85	7.75	3.53	4.23	183.64	82.34	101.3
CAN	2013	0.85	7.38	3.35	4.03	176.77	78.7	98.07
CAN	2014	0.86	7.08	3.16	3.92	170.05	74.23	95.82
CAN	2015	0.86	6.47	2.38	4.09	158.49	61.64	96.84
CAN	2016	0.86	5.97	2.43	3.54	147.57	59.86	87.71
CAN	2017	0.87	5.42	2.36	3.06	134.1	60.22	73.88
CAN	2018	0.87	4.89	2.36	2.54	122.86	58.92	63.94
CAN	2019	0.87	4.54	2.39	2.15	115.83	59.67	56.16
CAN	2020	0.87	4.91	2.44	2.47	125.78	59.09	66.69
CAN	2021	0.87	4.16	2.41	1.75	109.56	56.67	52.89
CHE	1990	0.86	49	2.39	46.62	980.73	60.64	920.09
CHE	1991	0.86	47.41	2.41	44.99	954.14	59.93	894.21
CHE	1992	0.87	45.44	2.36	43.08	918.87	57.84	861.03
CHE	1993	0.87	43.63	2.39	41.24	881.26	59.8	821.46
CHE	1994	0.87	41.58	2.32	39.26	842.96	59.75	783.22
CHE	1995	0.87	39.62	2.25	37.37	805.89	54.14	751.76
CHE	1996	0.88	37.56	2.26	35.3	763.27	54.31	708.96
CHE	1997	0.88	36.15	2.25	33.9	736.09	53.37	682.71
CHE	1998	0.88	34.48	2.25	32.22	702.31	54.45	647.86
CHE	1999	0.88	32.54	2.24	30.29	665.81	53.52	612.28
CHE	2000	0.89	30.21	2.21	28	627.55	54.04	573.51
CHE	2001	0.89	27.87	2.25	25.61	585.22	54.48	530.74
CHE	2002	0.89	26.4	2.28	24.12	553.99	54.04	499.94
CHE	2003	0.89	25.02	2.24	22.79	524.56	54.73	469.83
CHE	2004	0.89	22.95	2.25	20.69	489.41	53.92	435.49
CHE	2005	0.9	21.58	2.25	19.33	464.97	53.79	411.18
CHE	2006	0.9	20.17	2.28	17.89	440.37	53.67	386.7
CHE	2007	0.9	19.17	2.24	16.93	420.81	54.03	366.78
CHE	2008	0.91	18.26	2.25	16.01	402.64	53.65	348.99
CHE	2009	0.91	17.46	2.29	15.17	389.97	54.75	335.22
CHE	2010	0.91	16.17	2.23	13.94	366.59	53.86	312.73
CHE	2011	0.91	15.13	2.31	12.82	345.77	54.77	291
CHE	2012	0.92	14.46	2.25	12.22	330.68	53.46	277.22
CHE	2013	0.92	13.67	2.21	11.46	316.08	53.17	262.91
CHE	2014	0.92	12.66	2.25	10.4	297.56	53.82	243.73
CHE	2015	0.92	11.92	2.26	9.66	281.34	54.16	227.18
CHE	2016	0.92	10.74	2.26	8.49	257.91	53.37	204.54
CHE	2017	0.93	9.7	2.26	7.44	236.59	53.79	182.8
CHE	2018	0.93	8.67	2.22	6.45	213.88	54.34	159.54
CHE	2019	0.93	7.56	2.27	5.29	189.88	54.58	135.29
CHE	2020	0.93	6.95	2.26	4.7	172.38	54.35	118.03
CHE	2021	0.93	7.05	2.26	4.79	182.67	54.2	128.47
CHL	1990	0.59	103.82	23.47	80.35	2282.39	608.87	1673.51
CHL	1991	0.59	95.85	22.58	73.28	2093.66	595.24	1498.42
CHL	1992	0.6	89.99	22.24	67.75	1972.94	585.71	1387.23
CHL	1993	0.6	86.53	21.47	65.06	1897.49	572.03	1325.46
CHL	1994	0.61	81.66	21.45	60.21	1800.33	571.24	1229.09
CHL	1995	0.62	79.26	20.55	58.71	1754.2	540	1214.2
CHL	1996	0.62	76.29	19.29	57	1692.38	504.65	1187.73
CHL	1997	0.63	72.42	17.4	55.02	1595.82	446.34	1149.48
CHL	1998	0.64	71.09	16.56	54.52	1563.71	440.53	1123.19
CHL	1999	0.65	69.26	16.25	53.01	1520.07	429.15	1090.92
CHL	2000	0.65	62.98	16.01	46.97	1398.92	420.13	978.79
CHL	2001	0.66	60.72	15.05	45.67	1360.42	390.14	970.28
CHL	2002	0.67	56.95	13.85	43.09	1272.35	353.65	918.7
CHL	2003	0.67	55.26	13.53	41.73	1231.12	348.33	882.78
CHL	2004	0.68	53.53	13.22	40.31	1194.47	337.2	857.27
CHL	2005	0.68	50.36	13.13	37.24	1131.42	336.19	795.23
CHL	2006	0.69	47.18	13.11	34.07	1070.41	334.8	735.6
CHL	2007	0.69	44.86	13.1	31.77	1023.87	335.25	688.62
CHL	2008	0.69	40.43	13.1	27.33	942.23	335.18	607.05
CHL	2009	0.7	38.96	13.1	25.86	913.38	335.06	578.31
CHL	2010	0.7	38.73	13.09	25.64	895.98	334.96	561.02
CHL	2011	0.71	37.53	13.11	24.43	878.32	334.55	543.76
CHL	2012	0.71	37.48	13.1	24.38	875.35	334.84	540.51
CHL	2013	0.72	37.38	13.09	24.28	877.12	325.64	551.48
CHL	2014	0.73	36.59	11.9	24.69	871.52	292.72	578.8
CHL	2015	0.74	35.71	9.28	26.44	855.77	224.83	630.93
CHL	2016	0.74	34.13	7.95	26.19	823.2	191.92	631.28
CHL	2017	0.75	32.66	7.64	25.02	793.5	188.61	604.89
CHL	2018	0.76	31.05	7.53	23.52	765.91	190.61	575.3
CHL	2019	0.77	30.21	7.12	23.09	751.03	189.15	561.88
CHL	2020	0.77	27.38	7.08	20.3	690.62	190.3	500.32
CHL	2021	0.77	26.84	7.04	19.8	678.31	190.26	488.04
CHN	1990	0.46	367.58	81.95	285.62	8142.7	2421.71	5720.99
CHN	1991	0.47	361.81	78.38	283.43	8013.88	2343.91	5669.96
CHN	1992	0.48	356.26	75.4	280.86	7866.79	2263.57	5603.22
CHN	1993	0.48	350.21	73.3	276.91	7693.32	2194.49	5498.83
CHN	1994	0.49	343.68	71.16	272.52	7507.05	2052.62	5454.43
CHN	1995	0.5	336.73	68.67	268.06	7320.14	1915.73	5404.41
CHN	1996	0.51	328.09	64.88	263.21	7097.77	1761.47	5336.3
CHN	1997	0.52	319.35	38.64	280.71	6862.99	1145.72	5717.27
CHN	1998	0.53	312.82	29.73	283.09	6665.27	787.33	5877.94
CHN	1999	0.54	307.1	28.26	278.84	6482.68	759.19	5723.48
CHN	2000	0.55	307.21	27.93	279.28	6381.79	730.77	5651.02
CHN	2001	0.55	304.28	27.47	276.82	6219.9	721.06	5498.83
CHN	2002	0.56	296.1	26.71	269.4	6013.87	699.35	5314.52
CHN	2003	0.57	294.76	24.58	270.18	5874.91	648.71	5226.19
CHN	2004	0.58	290.4	23.38	267.03	5725.83	622.61	5103.21
CHN	2005	0.59	277.28	23.02	254.25	5438.16	604.04	4834.12
CHN	2006	0.6	248.54	22.27	226.26	4943.43	585.33	4358.1
CHN	2007	0.61	232.89	21.53	211.36	4623.27	568.86	4054.41
CHN	2008	0.62	225.11	19.17	205.94	4434.83	504.96	3929.87
CHN	2009	0.63	219.03	18.08	200.95	4276.98	467.67	3809.3
CHN	2010	0.64	212.94	16.58	196.35	4122.79	439.94	3682.84
CHN	2011	0.65	203.91	15.94	187.97	3948.87	419.67	3529.2
CHN	2012	0.66	191.79	15.57	176.22	3749.1	412.58	3336.52
CHN	2013	0.66	184.31	15.06	169.25	3592.4	392.95	3199.45
CHN	2014	0.67	175.68	13.88	161.8	3421.99	356.58	3065.42
CHN	2015	0.67	166.49	13.46	153.04	3252.71	347.61	2905.1
CHN	2016	0.68	158.61	13.28	145.33	3091.72	336.98	2754.74
CHN	2017	0.68	147.79	13.11	134.69	2883.95	335.83	2548.12
CHN	2018	0.69	136.85	13.12	123.73	2676.71	334.57	2342.14
CHN	2019	0.7	127.62	13.09	114.53	2497.28	334.69	2162.59
CHN	2020	0.71	119.38	13.09	106.29	2333.02	335.4	1997.62
CHN	2021	0.72	125.13	13.1	112.03	2436.88	325.68	2111.2
CIV	1990	0.28	253.52	152.04	101.48	8419.04	4814.5	3604.54
CIV	1991	0.29	252.12	144.53	107.59	8364.32	4178.1	4186.23
CIV	1992	0.29	254.2	139.7	114.5	8408.86	4221.32	4187.54
CIV	1993	0.3	258.6	139.14	119.46	8552.45	4075.17	4477.28
CIV	1994	0.31	262.67	138.34	124.33	8709.82	4059.28	4650.54
CIV	1995	0.31	266.12	138.36	127.76	8845.5	4065.04	4780.46
CIV	1996	0.31	265.91	137.55	128.37	8847.53	4051.4	4796.13
CIV	1997	0.32	264.7	137.59	127.11	8811.67	4050.57	4761.1
CIV	1998	0.32	265.21	137.58	127.62	8813.31	4051.07	4762.23
CIV	1999	0.33	266.18	137.55	128.63	8804.64	4050.53	4754.11
CIV	2000	0.33	268.71	137.55	131.16	8782.7	4050.34	4732.36
CIV	2001	0.34	266.4	137.59	128.81	8674.47	4050.79	4623.69
CIV	2002	0.34	266.47	137.53	128.94	8597.5	4050.57	4546.93
CIV	2003	0.34	263.43	137.51	125.93	8493.07	4050.88	4442.19
CIV	2004	0.35	262.53	116.9	145.62	8420.6	3760.87	4659.74
CIV	2005	0.35	260.1	116.32	143.78	8331.48	3739.6	4591.88
CIV	2006	0.35	258.74	116.97	141.77	8257.71	3714.74	4542.98
CIV	2007	0.35	252.49	111.74	140.75	8066.6	3667.99	4398.61
CIV	2008	0.36	247.53	112.03	135.5	7847.05	3641.51	4205.54
CIV	2009	0.36	242.57	107.65	134.92	7659.53	3504.89	4154.64
CIV	2010	0.36	238.79	110.08	128.71	7496.12	3503	3993.12
CIV	2011	0.36	236.85	108.02	128.83	7380.7	3459.83	3920.86
CIV	2012	0.37	236.71	107.77	128.94	7395.86	3467.06	3928.81
CIV	2013	0.37	236.84	104.48	132.37	7436	3386.7	4049.3
CIV	2014	0.38	234.16	103.39	130.77	7376.97	3313.64	4063.32
CIV	2015	0.38	235.06	103.33	131.74	7365.44	3311.72	4053.72
CIV	2016	0.39	228.5	103.13	125.37	7129.5	3278.68	3850.81
CIV	2017	0.4	220.66	99.75	120.9	6832.47	3123.81	3708.66
CIV	2018	0.4	213.44	96.66	116.78	6535.25	2997.31	3537.95
CIV	2019	0.41	206.27	95.72	110.55	6258.66	2937.66	3321
CIV	2020	0.42	202.5	93.7	108.8	6065.4	2864.77	3200.63
CIV	2021	0.43	195.54	91.77	103.77	5807.76	2716.66	3091.1
CMR	1990	0.3	222.48	138.25	84.23	7168.01	4052.93	3115.08
CMR	1991	0.31	223.04	138.35	84.69	7178.6	4063.64	3114.96
CMR	1992	0.32	225.6	137.52	88.08	7240.51	4052.13	3188.38
CMR	1993	0.32	228.53	137.57	90.96	7310.37	4051.69	3258.67
CMR	1994	0.33	230.26	137.58	92.68	7334.24	4051.43	3282.81
CMR	1995	0.33	232.53	137.42	95.11	7365.48	4052.73	3312.74
CMR	1996	0.33	235.85	137.61	98.24	7423.02	4049.88	3373.13
CMR	1997	0.34	241.68	137.53	104.14	7530.19	4051.25	3478.94
CMR	1998	0.34	246.17	137.64	108.53	7591.71	4050.12	3541.58
CMR	1999	0.34	249.35	137.66	111.69	7618	4050.59	3567.41
CMR	2000	0.35	255.2	116.71	138.49	7706.11	3721.46	3984.65
CMR	2001	0.35	253.95	113.16	140.79	7630.96	3647.14	3983.82
CMR	2002	0.36	258.08	112.67	145.41	7731.36	3642.05	4089.31
CMR	2003	0.36	255.95	108.6	147.35	7649.81	3512.81	4137
CMR	2004	0.37	252.66	107.47	145.19	7515.85	3477.77	4038.08
CMR	2005	0.37	250.72	108.59	142.13	7431.66	3465.49	3966.17
CMR	2006	0.37	250.32	104.76	145.56	7368.77	3366.23	4002.54
CMR	2007	0.38	247.26	103.61	143.64	7255.08	3308.46	3946.62
CMR	2008	0.38	245.52	103.12	142.4	7175.9	3279.65	3896.25
CMR	2009	0.39	243.51	103.18	140.33	7125.05	3278.65	3846.4
CMR	2010	0.4	240.42	99.77	140.65	7028.45	3119.2	3909.25
CMR	2011	0.4	237.83	96.68	141.15	6926.58	2997.05	3929.53
CMR	2012	0.41	235.83	95.67	140.16	6824.7	2949.74	3874.96
CMR	2013	0.42	232.02	95.73	136.29	6706.88	2931.45	3775.42
CMR	2014	0.42	227.94	93.63	134.31	6592.94	2868.9	3724.04
CMR	2015	0.43	225.95	91.61	134.34	6471.91	2705.54	3766.37
CMR	2016	0.44	218.62	90.21	128.4	6277.28	2608.39	3668.89
CMR	2017	0.45	211.24	87.83	123.41	6026.07	2505.06	3521.01
CMR	2018	0.46	204.22	85.64	118.58	5802.7	2415.16	3387.54
CMR	2019	0.46	197.96	78.73	119.24	5594.72	2333.38	3261.33
CMR	2020	0.47	189.36	76.58	112.78	5305.66	2271.12	3034.54
CMR	2021	0.48	186.62	75.36	111.26	5199.13	2236.21	2962.92
COD	1990	0.29	277.5	140.32	137.19	8460.85	4119.14	4341.71
COD	1991	0.29	277	139.55	137.45	8434.8	4156.89	4277.91
COD	1992	0.29	275.16	140.07	135.09	8352.93	4142.26	4210.68
COD	1993	0.29	272.49	140.4	132.08	8253.48	4139.72	4113.76
COD	1994	0.29	272.77	145.35	127.41	8224.79	4234.28	3990.51
COD	1995	0.28	274.26	143.04	131.22	8227.07	4314.81	3912.26
COD	1996	0.28	278.84	150.81	128.03	8289.1	4938.22	3350.88
COD	1997	0.28	271.49	173.19	98.3	8084.74	5902.89	2181.85
COD	1998	0.27	270.58	172.95	97.62	8042.56	5892.72	2149.84
COD	1999	0.27	267.94	179.09	88.85	7960.77	6001.26	1959.51
COD	2000	0.26	267.78	179.03	88.75	7953.29	5996.53	1956.75
COD	2001	0.26	266.04	179.67	86.37	7881.93	6019.36	1862.57
COD	2002	0.25	261.63	186.61	75.02	7750.27	6052.48	1697.8
COD	2003	0.25	262.53	186.79	75.74	7759.49	6051.25	1708.24
COD	2004	0.25	258.73	186.69	72.03	7620.33	6046.06	1574.27
COD	2005	0.25	255.15	186.17	68.98	7493.62	6046.7	1446.93
COD	2006	0.26	253.81	179.32	74.49	7408.79	6001.56	1407.22
COD	2007	0.26	251.93	180.28	71.64	7297.06	6017.24	1279.82
COD	2008	0.27	252.68	171.98	80.71	7246.84	5866.88	1379.96
COD	2009	0.27	250.71	172.79	77.92	7148.97	5886.17	1262.79
COD	2010	0.28	249.24	150.53	98.72	7053.51	4812.77	2240.74
COD	2011	0.29	248.39	139.51	108.88	6987.59	4163.92	2823.66
COD	2012	0.3	246.74	139.12	107.62	6907.81	4078.9	2828.9
COD	2013	0.31	244.09	137.55	106.53	6798.45	4054.87	2743.59
COD	2014	0.32	242.07	137.53	104.54	6706.23	4049.9	2656.33
COD	2015	0.33	240.66	137.53	103.13	6599.3	4051.85	2547.45
COD	2016	0.34	237.52	137.64	99.88	6462.64	4050.41	2412.22
COD	2017	0.35	233.99	119.27	114.71	6293.44	3721.43	2572.01
COD	2018	0.36	231.75	110.28	121.47	6170.77	3490.19	2680.58
COD	2019	0.37	229.67	107.84	121.83	6037.56	3465.32	2572.24
COD	2020	0.38	228.37	103.26	125.12	5923.94	3313.34	2610.6
COD	2021	0.38	227.51	103.26	124.25	5841.77	3311.76	2530.01
COG	1990	0.42	310.02	93.41	216.61	8361.19	2858.84	5502.36
COG	1991	0.43	308.27	92.1	216.17	8287.49	2711.78	5575.71
COG	1992	0.43	307.54	91.9	215.64	8261.04	2722.1	5538.94
COG	1993	0.44	309.72	90.22	219.5	8308.34	2628.02	5680.32
COG	1994	0.44	316.71	90.2	226.51	8523.8	2613.81	5909.99
COG	1995	0.44	319.36	90.35	229.01	8573.64	2618.66	5954.98
COG	1996	0.45	322.2	87.57	234.63	8644.13	2502.78	6141.35
COG	1997	0.45	321.86	87.73	234.13	8652.9	2505.39	6147.51
COG	1998	0.45	313.88	87.4	226.47	8400	2477.44	5922.56
COG	1999	0.46	309.73	85.76	223.97	8301.3	2421.72	5879.58
COG	2000	0.46	302.5	82.51	220	8090.29	2427.4	5662.89
COG	2001	0.46	289.59	78.42	211.17	7702.76	2333.98	5368.78
COG	2002	0.47	279.66	78.54	201.12	7423.59	2339.78	5083.8
COG	2003	0.47	275.09	76.42	198.67	7298.75	2322.23	4976.52
COG	2004	0.47	268.83	76.6	192.23	7104.79	2265.23	4839.56
COG	2005	0.48	261.74	75.22	186.52	6909.59	2238.34	4671.24
COG	2006	0.48	255.15	73.09	182.05	6691.33	2193.35	4497.97
COG	2007	0.49	250	73.23	176.77	6530.59	2155.96	4374.63
COG	2008	0.49	243.51	71.33	172.18	6327.82	2055.58	4272.24
COG	2009	0.5	235.25	68.72	166.53	6100.36	1947.91	4152.45
COG	2010	0.51	229.04	66.08	162.95	5912.2	1840.39	4071.81
COG	2011	0.51	222.7	62.59	160.11	5730.33	1662.49	4067.84
COG	2012	0.52	218.12	38.07	180.05	5596.01	1151.57	4444.44
COG	2013	0.53	214.84	29.76	185.08	5486.59	815.73	4670.86
COG	2014	0.54	210.67	28.31	182.36	5368.46	735.22	4633.24
COG	2015	0.55	206.58	27.91	178.66	5233.57	730.6	4502.96
COG	2016	0.56	200.32	27.46	172.86	5058.91	721.48	4337.43
COG	2017	0.56	195.34	25.73	169.61	4906	671.17	4234.83
COG	2018	0.57	191.35	24.75	166.6	4781.6	645.37	4136.22
COG	2019	0.57	187.64	24.07	163.57	4677.63	628.01	4049.62
COG	2020	0.58	183.22	23.57	159.66	4550.71	620.95	3929.76
COG	2021	0.58	183.1	23.17	159.93	4540.89	610.68	3930.21
COK	1990	0.56	40.48	25.61	14.87	1093.27	676.31	416.97
COK	1991	0.57	37.67	24.65	13.03	1017.19	649.39	367.8
COK	1992	0.58	35.03	23.57	11.46	946.5	619.09	327.4
COK	1993	0.58	32.57	23.17	9.39	881	610.63	270.36
COK	1994	0.59	30.65	22.98	7.67	829.43	602.19	227.24
COK	1995	0.6	29.09	22.21	6.88	786.84	583.25	203.59
COK	1996	0.61	27.76	21.56	6.2	750.39	571.98	178.41
COK	1997	0.61	26.6	20.35	6.25	718.73	539.3	179.43
COK	1998	0.62	25.61	19.18	6.42	691.08	506.74	184.34
COK	1999	0.63	24.67	18.22	6.44	666.81	469.12	197.69
COK	2000	0.64	23.71	17.28	6.43	640.99	448.91	192.07
COK	2001	0.64	22.51	16.21	6.31	607.65	426.5	181.15
COK	2002	0.65	21.38	15.98	5.41	577.45	419.7	157.75
COK	2003	0.66	20.34	15.08	5.26	549.24	387.41	161.83
COK	2004	0.67	19.41	13.98	5.43	524.56	355.29	169.27
COK	2005	0.67	18.49	13.48	5.01	502.08	347.49	154.6
COK	2006	0.68	17.42	13.23	4.19	475.8	337.18	138.62
COK	2007	0.69	16.38	13.08	3.3	450.23	334.82	115.41
COK	2008	0.7	15.26	13.1	2.16	421.82	334.98	86.84
COK	2009	0.7	14.41	13.12	1.29	400.17	334.77	65.4
COK	2010	0.71	14.03	13.09	0.94	390.67	334.7	55.96
COK	2011	0.72	13.9	13.1	0.8	387.37	334.47	52.91
COK	2012	0.73	13.76	11.97	1.79	383.88	293.57	90.31
COK	2013	0.73	13.6	10.44	3.16	379.91	247.88	132.03
COK	2014	0.74	13.53	8.59	4.94	378.83	208.06	170.77
COK	2015	0.75	13.53	7.78	5.75	380.07	190.84	189.23
COK	2016	0.75	13.84	7.63	6.21	388.28	189.22	199.06
COK	2017	0.76	14.3	7.54	6.76	400.81	190.94	209.87
COK	2018	0.76	14.76	7.14	7.63	413.46	190.08	223.38
COK	2019	0.77	14.97	7.07	7.9	419.61	190.04	229.58
COK	2020	0.77	14.78	6.86	7.92	422.77	189.85	232.92
COK	2021	0.78	14.74	6.84	7.91	423.94	189.4	234.55
COL	1990	0.48	102.17	75.05	27.12	2787.69	2240.18	547.52
COL	1991	0.48	102.52	73.42	29.1	2762.98	2187.9	575.08
COL	1992	0.48	99.54	72.91	26.62	2674.73	2189.26	485.47
COL	1993	0.49	95.48	71.11	24.38	2584.43	2131.51	452.92
COL	1994	0.49	92.58	71.27	21.31	2504.71	2051.73	452.98
COL	1995	0.5	89.87	68.92	20.95	2429.56	1940.91	488.65
COL	1996	0.5	88.45	66.25	22.2	2386.81	1832.42	554.39
COL	1997	0.51	81.62	64.87	16.75	2229.81	1770.65	459.16
COL	1998	0.52	76.7	62.57	14.13	2106.96	1654.56	452.4
COL	1999	0.52	75.55	40.18	35.38	2054.4	1067.89	986.51
COL	2000	0.53	72.61	32.44	40.17	1965.47	892.64	1072.84
COL	2001	0.53	70.16	29.37	40.79	1880.92	792.53	1088.4
COL	2002	0.54	66.38	28.53	37.85	1775.15	747.79	1027.35
COL	2003	0.54	64.54	28.46	36.08	1718.08	735.62	982.46
COL	2004	0.55	61.79	27.95	33.84	1645.86	730.6	915.26
COL	2005	0.55	58.14	27.46	30.68	1557.49	722.62	834.87
COL	2006	0.56	56.05	26.65	29.4	1505.76	699.49	806.27
COL	2007	0.57	51.78	24.77	27.01	1395.06	650.41	744.65
COL	2008	0.57	49.44	23.96	25.48	1329.18	630.85	698.32
COL	2009	0.58	47.81	23.55	24.26	1287.87	619.65	668.22
COL	2010	0.59	45.18	23.28	21.9	1206.04	610.72	595.32
COL	2011	0.59	41.51	22.6	18.91	1109.52	595.46	514.06
COL	2012	0.6	39.36	22.18	17.18	1057.77	584.94	472.83
COL	2013	0.61	37.4	21.53	15.87	1005.22	570.93	434.29
COL	2014	0.61	35.32	20.56	14.76	950.59	539.14	411.44
COL	2015	0.62	34.03	19.25	14.77	912.92	508.36	404.55
COL	2016	0.63	32.23	18.09	14.14	863.39	467.22	396.16
COL	2017	0.63	29.43	17.42	12.01	791.64	449.33	342.31
COL	2018	0.64	28.04	16.63	11.41	754.36	436.64	317.72
COL	2019	0.65	26.05	16.27	9.78	701.44	428.34	273.1
COL	2020	0.65	25.21	15.89	9.32	664.58	421.23	243.34
COL	2021	0.66	25.68	15.57	10.11	663.35	411.86	251.5
COM	1990	0.27	251.5	172.8	78.7	8874.52	5895.98	2978.54
COM	1991	0.28	250.16	150.6	99.56	8815.14	4776.05	4039.08
COM	1992	0.29	247.65	139.63	108.02	8704.18	4182.69	4521.49
COM	1993	0.3	245.04	139.11	105.94	8594.03	4058.51	4535.52
COM	1994	0.31	243.5	138.31	105.19	8529.76	4068.4	4461.35
COM	1995	0.31	239.92	137.67	102.24	8393.69	4052.06	4341.63
COM	1996	0.32	236.79	137.49	99.3	8288.37	4050.97	4237.4
COM	1997	0.33	232.59	137.54	95.05	8106.49	4050.78	4055.71
COM	1998	0.34	226.29	137.57	88.72	7888.76	4052.06	3836.7
COM	1999	0.34	217.61	137.51	80.1	7592.3	4050.38	3541.92
COM	2000	0.35	212.27	111.44	100.83	7411.14	3643.29	3767.85
COM	2001	0.36	203.52	109.22	94.3	7110.86	3519.53	3591.33
COM	2002	0.37	196.22	108.22	88	6862.73	3467.62	3395.11
COM	2003	0.37	188.32	104.41	83.91	6592.21	3368.78	3223.42
COM	2004	0.38	179.59	103.7	75.89	6279.84	3306.74	2973.1
COM	2005	0.39	177.47	103.02	74.45	6187.69	3277.07	2910.62
COM	2006	0.39	172.45	100.08	72.37	5972.21	3134.51	2837.69
COM	2007	0.4	173.6	100.17	73.43	6019.01	3129.85	2889.16
COM	2008	0.4	172.93	96.62	76.3	5950.37	3006.29	2944.08
COM	2009	0.41	168.11	95.4	72.71	5718.2	2952.18	2766.02
COM	2010	0.42	165.01	95.32	69.68	5519.09	2933	2586.09
COM	2011	0.42	164.68	93.8	70.88	5489.85	2854.73	2635.12
COM	2012	0.43	162.4	91.57	70.83	5365.77	2722.29	2643.48
COM	2013	0.43	160.57	91.97	68.6	5256.6	2688.86	2567.74
COM	2014	0.44	163.16	90.51	72.64	5363.09	2610.82	2752.26
COM	2015	0.44	161.94	88.98	72.97	5265.09	2560.07	2705.02
COM	2016	0.45	160.32	87.61	72.71	5159.69	2500.26	2659.43
COM	2017	0.46	158.28	85.92	72.36	5047.8	2419.57	2628.23
COM	2018	0.46	155.41	82.81	72.6	4897.96	2430.56	2467.4
COM	2019	0.47	155.04	78.36	76.69	4833.64	2345.47	2488.17
COM	2020	0.47	153.2	76.51	76.69	4734.41	2268.2	2466.21
COM	2021	0.48	152.95	75.25	77.71	4678.5	2264.21	2414.29
CPV	1990	0.28	141.8	141.8	0	4152.15	4152.15	0
CPV	1991	0.28	140.27	140.27	0	4103.82	4103.82	0
CPV	1992	0.29	138.51	138.51	0	4055.74	4055.74	0
CPV	1993	0.29	138.69	138.57	0.12	4052.45	4052.45	0
CPV	1994	0.3	138	138	0	4047.71	4047.71	0
CPV	1995	0.31	137.18	137.18	0	4062.87	4051.1	11.77
CPV	1996	0.32	138.73	137.59	1.13	4086.99	4050.25	36.74
CPV	1997	0.33	141.79	137.52	4.27	4133.89	4051.31	82.58
CPV	1998	0.34	139.75	137.52	2.22	4063.94	4050.08	13.86
CPV	1999	0.35	138.65	118.27	20.39	4049.8	3702.97	346.83
CPV	2000	0.36	135.84	108.55	27.29	3932.61	3504.51	428.1
CPV	2001	0.37	132.94	104.29	28.65	3825.86	3376.56	449.31
CPV	2002	0.38	129.62	103.34	26.28	3717.15	3309.85	407.3
CPV	2003	0.39	125.41	103.08	22.34	3570.08	3277.91	292.17
CPV	2004	0.4	121.35	100.05	21.3	3429.52	3134.81	294.71
CPV	2005	0.41	117.37	97.11	20.26	3294.18	3002.47	291.71
CPV	2006	0.42	105.9	93.47	12.43	3018.82	2864.23	154.59
CPV	2007	0.43	97.76	91.58	6.18	2795.04	2706.84	88.2
CPV	2008	0.44	91.54	90.2	1.34	2607.82	2604.31	3.51
CPV	2009	0.45	86.9	86.9	0	2462.52	2462.52	0
CPV	2010	0.46	84.53	84.53	0	2384.77	2384.77	0
CPV	2011	0.46	89.23	78.77	10.46	2453.21	2341.36	111.85
CPV	2012	0.47	95.21	76.58	18.62	2604.1	2266.58	337.53
CPV	2013	0.48	99.88	75.55	24.33	2710.63	2238.6	472.04
CPV	2014	0.49	105.65	71.46	34.19	2817.32	2129.57	687.76
CPV	2015	0.5	111.39	70.82	40.57	2895.99	1964.2	931.79
CPV	2016	0.5	113.31	68.41	44.9	2868.29	1909.77	958.52
CPV	2017	0.51	110.55	66.16	44.4	2764.96	1816.87	948.1
CPV	2018	0.52	127.64	62.74	64.9	2982.44	1662.13	1320.31
CPV	2019	0.52	123.22	39.56	83.66	2871.49	1123.74	1747.75
CPV	2020	0.53	123.38	31.6	91.77	2857.05	805.73	2051.32
CPV	2021	0.53	117.76	28.91	88.85	2732.83	786.15	1946.69
CRI	1990	0.53	65.4	29.2	36.21	1603.83	794.97	808.86
CRI	1991	0.54	63.23	28.82	34.41	1546.51	749.45	797.06
CRI	1992	0.54	61.18	28.31	32.87	1499.9	735.55	764.34
CRI	1993	0.55	58.29	27.97	30.32	1433.24	730.83	702.41
CRI	1994	0.56	58.72	27.5	31.23	1437.75	719.72	718.03
CRI	1995	0.56	58.83	26.74	32.09	1440.92	699.55	741.37
CRI	1996	0.57	55.34	25.86	29.48	1352.25	671.18	681.07
CRI	1997	0.57	53.88	24.77	29.12	1324.78	649.09	675.69
CRI	1998	0.58	52.42	24.18	28.24	1279.27	629.9	649.37
CRI	1999	0.58	52.43	23.23	29.2	1269.54	609.89	659.65
CRI	2000	0.59	49.69	22.92	26.77	1191.92	602.28	589.64
CRI	2001	0.59	48.85	22.63	26.21	1179.31	595.66	583.66
CRI	2002	0.6	44.73	22.26	22.47	1103.77	587.19	516.58
CRI	2003	0.61	43.36	21.57	21.79	1065.7	569.77	495.94
CRI	2004	0.61	41.72	21.54	20.18	1025.32	572.38	452.94
CRI	2005	0.61	37.26	20.51	16.74	937.89	538.5	399.38
CRI	2006	0.62	36.62	20.61	16.01	932.51	543.56	388.94
CRI	2007	0.62	31.1	19.42	11.69	825.73	506.98	318.75
CRI	2008	0.63	29.7	18.33	11.37	793.86	470.93	322.93
CRI	2009	0.63	27.88	17.17	10.71	752.82	451.01	301.8
CRI	2010	0.64	29.87	16.56	13.3	801.65	438.61	363.04
CRI	2011	0.64	27.79	16.56	11.23	756.56	438.79	317.77
CRI	2012	0.65	27.33	16.21	11.12	743.1	428.76	314.34
CRI	2013	0.65	27.14	15.88	11.26	734.19	421.07	313.11
CRI	2014	0.66	26.91	15.64	11.27	725.08	412.25	312.83
CRI	2015	0.66	26.67	15.03	11.64	720.42	386.41	334.01
CRI	2016	0.67	26.22	13.84	12.38	703.69	356.36	347.33
CRI	2017	0.67	23.61	13.54	10.06	639.28	345.88	293.4
CRI	2018	0.68	21.38	13.15	8.23	586.45	335.61	250.84
CRI	2019	0.69	19.53	13.13	6.41	547.02	335.37	211.65
CRI	2020	0.7	19.23	13.1	6.13	554.64	334.76	219.88
CRI	2021	0.7	18.12	13.1	5.03	524.32	334.91	189.41
CUB	1990	0.56	77.92	26.71	51.22	1695.66	699.39	996.27
CUB	1991	0.56	75.02	25.68	49.33	1636.99	671.49	965.5
CUB	1992	0.57	75.39	25.73	49.67	1628.52	669.97	958.56
CUB	1993	0.57	75.76	25.64	50.12	1623.45	675.4	948.05
CUB	1994	0.56	74.35	25.72	48.64	1610.72	672.27	938.46
CUB	1995	0.56	72.6	26.76	45.84	1584.21	702.97	881.24
CUB	1996	0.56	71.44	26.87	44.57	1546.69	697.72	848.96
CUB	1997	0.56	69.4	26.7	42.7	1514.44	700.58	813.86
CUB	1998	0.56	68.4	26.76	41.65	1505.58	699.47	806.11
CUB	1999	0.56	67.2	25.79	41.41	1478.73	673.53	805.2
CUB	2000	0.57	63.77	24.76	39.01	1412.81	648.27	764.54
CUB	2001	0.57	62.3	24.04	38.26	1375.46	632.19	743.27
CUB	2002	0.58	56.51	23.51	33	1265.54	618.39	647.15
CUB	2003	0.59	55.96	22.95	33.01	1243.97	603.94	640.03
CUB	2004	0.59	55.49	22.55	32.93	1217.55	596.97	620.58
CUB	2005	0.6	55.53	22.21	33.32	1215.85	586.06	629.79
CUB	2006	0.6	51.13	21.54	29.6	1131.86	572.13	559.74
CUB	2007	0.61	49.98	21.52	28.46	1112.08	571.11	540.97
CUB	2008	0.61	49.84	21.45	28.39	1100.89	568.61	532.29
CUB	2009	0.61	48.87	20.54	28.34	1082.2	541.14	541.06
CUB	2010	0.62	48.34	20.48	27.86	1070.6	537.6	533
CUB	2011	0.62	45.52	19.46	26.06	1020.62	501.22	519.4
CUB	2012	0.63	46.69	18.2	28.49	1049.4	470.83	578.58
CUB	2013	0.63	47.97	17.3	30.67	1077.41	451.34	626.07
CUB	2014	0.64	49.26	16.6	32.66	1102.81	437.28	665.53
CUB	2015	0.64	50.96	16.23	34.73	1142.63	428.47	714.16
CUB	2016	0.65	49.75	16.2	33.56	1121.78	429.49	692.29
CUB	2017	0.65	50.2	15.92	34.28	1129.08	418.38	710.69
CUB	2018	0.66	48.68	15.53	33.15	1105.23	412.44	692.79
CUB	2019	0.66	48.61	15.07	33.54	1118.87	388.7	730.17
CUB	2020	0.67	48.98	14.37	34.61	1113.5	369.81	743.69
CUB	2021	0.67	46.15	13.8	32.35	1043.15	359.36	683.8
CYP	1990	0.65	111.4	15.89	95.51	1823.59	420.14	1403.46
CYP	1991	0.66	115.36	15.6	99.76	1865.81	411.77	1454.04
CYP	1992	0.67	118.28	14.41	103.88	1891.64	366.79	1524.85
CYP	1993	0.68	115.96	13.24	102.73	1860.58	336.3	1524.27
CYP	1994	0.69	108.24	13.1	95.14	1765.57	335.14	1430.43
CYP	1995	0.7	105.28	13.09	92.19	1730.03	334.81	1395.22
CYP	1996	0.71	100.82	13.11	87.7	1673.91	335.36	1338.55
CYP	1997	0.72	101.11	13.11	88	1664.79	334.51	1330.27
CYP	1998	0.73	98.41	11.9	86.51	1622.25	292.42	1329.83
CYP	1999	0.74	90.64	9.1	81.54	1524.84	231.74	1293.1
CYP	2000	0.75	84.85	7.93	76.93	1448.14	190.02	1258.12
CYP	2001	0.75	79.87	7.67	72.19	1373.69	191.85	1181.85
CYP	2002	0.76	75.66	7.55	68.11	1312.86	189.64	1123.23
CYP	2003	0.77	71.05	7.02	64.03	1245.98	188.97	1057.01
CYP	2004	0.77	63.61	6.85	56.77	1148.76	191.41	957.34
CYP	2005	0.78	59.2	6.87	52.33	1085.79	190.65	895.13
CYP	2006	0.78	57.06	6.87	50.19	1045.48	184.3	861.18
CYP	2007	0.79	54.45	6.59	47.86	992.53	159.82	832.71
CYP	2008	0.8	52.23	6.56	45.66	946.48	158	788.49
CYP	2009	0.81	51.05	6.57	44.48	916.27	157.94	758.33
CYP	2010	0.81	50.88	6.57	44.31	894.29	155.83	738.47
CYP	2011	0.81	49.06	6.23	42.82	857.88	148.62	709.26
CYP	2012	0.82	46.36	6.22	40.14	815.95	142.25	673.7
CYP	2013	0.82	43.72	6.14	37.58	778.08	142.15	635.93
CYP	2014	0.82	41.64	6.11	35.53	742.42	137.3	605.12
CYP	2015	0.82	39.86	6.11	33.75	710.96	136.9	574.06
CYP	2016	0.82	37.41	6.1	31.31	667.64	136.02	531.62
CYP	2017	0.83	36.61	6	30.61	653.34	134.08	519.26
CYP	2018	0.83	34.67	5.87	28.8	623.38	131.02	492.36
CYP	2019	0.83	32.73	5.87	26.86	589.59	131.21	458.38
CYP	2020	0.83	26.99	5.87	21.12	492.68	130.5	362.18
CYP	2021	0.84	29.19	5.47	23.72	535.8	119.36	416.44
CZE	1990	0.68	129.69	13.11	116.58	2766.05	336.24	2429.81
CZE	1991	0.69	122.97	13.11	109.86	2612.78	334.5	2278.28
CZE	1992	0.7	118.38	13.1	105.29	2509.24	335.17	2174.07
CZE	1993	0.71	113.08	13.11	99.97	2367.71	334.66	2033.06
CZE	1994	0.73	109.33	11.75	97.58	2281.65	293.6	1988.05
CZE	1995	0.74	106.47	8.92	97.55	2220	222.96	1997.04
CZE	1996	0.75	98.16	7.81	90.36	2046.07	192.23	1853.84
CZE	1997	0.75	94.34	7.66	86.69	1947.1	191.12	1755.98
CZE	1998	0.76	86.4	7.54	78.85	1760.34	188.44	1571.91
CZE	1999	0.76	81.66	7.07	74.6	1653.5	191.17	1462.33
CZE	2000	0.77	78.58	7.03	71.56	1586.41	191.12	1395.29
CZE	2001	0.77	77.52	7.04	70.48	1546.33	189.41	1356.92
CZE	2002	0.78	78.08	6.87	71.21	1541.54	189.94	1351.61
CZE	2003	0.78	81.07	6.83	74.25	1579.44	189.01	1390.43
CZE	2004	0.79	77.62	6.82	70.8	1525.03	174.12	1350.91
CZE	2005	0.79	76.26	6.81	69.45	1497.99	159.69	1338.3
CZE	2006	0.79	72.06	6.6	65.45	1420.54	158.79	1261.75
CZE	2007	0.8	70.01	6.62	63.39	1385.23	158.78	1226.45
CZE	2008	0.8	67.77	6.57	61.19	1340.16	158.13	1182.04
CZE	2009	0.8	64.68	6.57	58.11	1285.82	157.78	1128.04
CZE	2010	0.81	61.35	6.56	54.79	1229.64	155.51	1074.13
CZE	2011	0.81	58.93	6.56	52.37	1184.34	149.09	1035.25
CZE	2012	0.81	55.87	6.25	49.62	1123.73	148.81	974.92
CZE	2013	0.82	52.82	6.26	46.56	1066.47	147.17	919.31
CZE	2014	0.82	48.28	6.24	42.03	980.33	147.78	832.55
CZE	2015	0.82	46.15	6.19	39.96	939.7	143.29	796.41
CZE	2016	0.82	42.26	6.2	36.06	870.44	141.73	728.71
CZE	2017	0.82	38.67	6.14	32.53	800.45	142.06	658.39
CZE	2018	0.82	35.38	6.11	29.27	738.58	136.69	601.89
CZE	2019	0.82	33.04	6.1	26.93	694.42	136.15	558.27
CZE	2020	0.83	32.75	6	26.75	669.34	133.92	535.42
CZE	2021	0.83	31.27	5.87	25.4	657.95	130.74	527.21
DEU	1990	0.82	71.8	6.21	65.6	1433.56	141.38	1292.18
DEU	1991	0.82	69.34	6.11	63.23	1381.8	137.32	1244.48
DEU	1992	0.83	66.19	5.89	60.3	1315.62	130.68	1184.94
DEU	1993	0.83	64.67	5.87	58.81	1281.14	130.5	1150.64
DEU	1994	0.84	61.51	5.37	56.14	1222.52	118.52	1104
DEU	1995	0.84	58.5	4.77	53.73	1161.52	104.03	1057.48
DEU	1996	0.84	55.97	4.84	51.13	1106.24	103.35	1002.89
DEU	1997	0.84	53.05	4.21	48.83	1047.93	91.03	956.9
DEU	1998	0.84	50.04	4.22	45.82	989.64	91.6	898.04
DEU	1999	0.85	46.7	3.83	42.87	932.96	87.05	845.9
DEU	2000	0.85	43.04	3.57	39.47	871.91	82.65	789.26
DEU	2001	0.85	40.89	3.58	37.3	829.8	82.13	747.67
DEU	2002	0.86	39.83	3.34	36.49	802.51	78.99	723.52
DEU	2003	0.86	38.27	2.36	35.91	771.97	62.77	709.2
DEU	2004	0.86	34.73	2.45	32.29	716.34	59.66	656.68
DEU	2005	0.86	32.68	2.39	30.29	681.95	58.09	623.86
DEU	2006	0.87	31.47	2.34	29.13	657.71	58.43	599.28
DEU	2007	0.87	30.87	2.46	28.41	643.78	58.52	585.26
DEU	2008	0.87	30.14	2.49	27.65	624.97	60.44	564.54
DEU	2009	0.88	29.12	2.24	26.87	608.58	55	553.58
DEU	2010	0.88	27.56	2.25	25.31	583.43	53.71	529.72
DEU	2011	0.88	26.24	2.22	24.02	558.06	53.98	504.08
DEU	2012	0.88	24.76	2.28	22.48	524.01	53.92	470.09
DEU	2013	0.89	23.2	2.26	20.94	492.48	53.95	438.54
DEU	2014	0.89	20.64	2.22	18.42	444.24	53.69	390.56
DEU	2015	0.89	19.39	2.25	17.13	419.93	53.65	366.28
DEU	2016	0.89	18.11	2.23	15.88	395.36	53.92	341.44
DEU	2017	0.89	16.53	2.22	14.31	363.99	54.37	309.61
DEU	2018	0.9	15.26	2.25	13.01	340.05	53.9	286.15
DEU	2019	0.9	13.69	2.3	11.38	310.94	54.45	256.49
DEU	2020	0.9	12.67	2.24	10.44	288.23	54.72	233.51
DEU	2021	0.9	12.87	2.29	10.58	295.59	53.54	242.05
DJI	1990	0.34	172.71	137.52	35.19	5388.3	4052.37	1335.92
DJI	1991	0.34	169.97	137.54	32.43	5265.96	4050.58	1215.38
DJI	1992	0.34	169.66	137.59	32.07	5309.2	4050.19	1259.01
DJI	1993	0.34	171.57	137.56	34.01	5466.15	4050.67	1415.48
DJI	1994	0.35	167.94	118.93	49.02	5317.29	3744.19	1573.1
DJI	1995	0.35	168.89	117.43	51.46	5349.96	3754.2	1595.76
DJI	1996	0.35	167.7	113.31	54.4	5296.45	3626.38	1670.07
DJI	1997	0.36	165.13	110.05	55.08	5162.96	3516.24	1646.72
DJI	1998	0.36	165.34	108.28	57.06	5131.43	3515.19	1616.24
DJI	1999	0.37	163.69	108.55	55.14	5043.46	3471.23	1572.23
DJI	2000	0.37	162.08	107.13	54.95	4974.36	3463.26	1511.1
DJI	2001	0.37	158.24	104.59	53.65	4840.16	3360.64	1479.52
DJI	2002	0.38	153.05	103.35	49.69	4663.49	3324.99	1338.49
DJI	2003	0.38	146.81	103.41	43.39	4466.61	3312.15	1154.46
DJI	2004	0.38	144.25	103.07	41.19	4401.79	3280.91	1120.88
DJI	2005	0.39	141.66	103.09	38.57	4312.69	3276.24	1036.44
DJI	2006	0.4	140.19	100.28	39.91	4256.47	3119.54	1136.94
DJI	2007	0.4	139.41	96.69	42.72	4211.08	2995.73	1215.35
DJI	2008	0.41	138.33	96.39	41.94	4143.65	2998.99	1144.67
DJI	2009	0.41	137.53	95.49	42.04	4081.61	2931.91	1149.71
DJI	2010	0.42	137.76	94.05	43.71	4055.72	2870.83	1184.89
DJI	2011	0.42	137.8	93.7	44.11	4018.24	2854.62	1163.62
DJI	2012	0.43	137.67	91.91	45.76	3985.56	2722.12	1263.44
DJI	2013	0.43	137.68	91.95	45.73	3957.09	2685.78	1271.31
DJI	2014	0.44	136.55	90.39	46.15	3886.05	2615.13	1270.92
DJI	2015	0.45	136.91	88.98	47.94	3860.88	2561.04	1299.84
DJI	2016	0.45	135.37	88.06	47.3	3788.63	2497.04	1291.59
DJI	2017	0.46	133.48	82.44	51.04	3701.89	2424.39	1277.5
DJI	2018	0.47	129.59	78.75	50.85	3553.53	2331.95	1221.58
DJI	2019	0.48	126.39	74.92	51.47	3435.36	2267.61	1167.75
DJI	2020	0.48	118.18	73.04	45.14	3174.33	2224.75	949.58
DJI	2021	0.49	122.58	73.1	49.48	3261.49	2153.16	1108.33
DMA	1990	0.56	125.45	25.71	99.74	2822.54	672.38	2150.16
DMA	1991	0.57	120.48	25.65	94.83	2722.08	669.21	2052.87
DMA	1992	0.57	114.55	24.56	89.99	2603.55	649.34	1954.21
DMA	1993	0.58	109.43	23.43	86	2498.29	618.05	1880.23
DMA	1994	0.59	104.82	22.94	81.88	2405.32	603.12	1802.21
DMA	1995	0.6	100.45	22.28	78.17	2312.06	585.48	1726.58
DMA	1996	0.61	97.32	20.62	76.7	2245.53	539.09	1706.44
DMA	1997	0.63	92.57	18.19	74.38	2145.22	470.02	1675.21
DMA	1998	0.63	88.86	17.16	71.71	2063.46	453.21	1610.25
DMA	1999	0.64	85.55	16.62	68.93	2004.45	438.38	1566.07
DMA	2000	0.65	81.92	16.22	65.71	1920.65	427.81	1492.83
DMA	2001	0.65	78.32	15.88	62.44	1858.3	419.58	1438.72
DMA	2002	0.66	75.67	15.59	60.08	1796.42	412.25	1384.16
DMA	2003	0.66	73.84	14.35	59.49	1764.86	368.72	1396.14
DMA	2004	0.67	71.23	13.89	57.34	1710.69	353.57	1357.13
DMA	2005	0.67	68.75	13.48	55.27	1672.92	346.91	1326.01
DMA	2006	0.68	67.2	13.23	53.97	1639.96	336.08	1303.88
DMA	2007	0.69	65.1	13.1	52	1614.79	336.86	1277.94
DMA	2008	0.69	63.69	13.1	50.59	1578.74	334.95	1243.78
DMA	2009	0.69	62.48	13.12	49.36	1587.77	334.87	1252.91
DMA	2010	0.7	62.76	13.11	49.66	1613.57	335.18	1278.39
DMA	2011	0.7	63.44	13.09	50.34	1664.64	335.12	1329.52
DMA	2012	0.71	64.77	13.1	51.67	1713.05	334.51	1378.53
DMA	2013	0.71	66.26	13.11	53.16	1778.54	334.77	1443.77
DMA	2014	0.72	67.24	13.1	54.14	1814.12	334.35	1479.76
DMA	2015	0.72	67.71	13.11	54.6	1828.08	313.74	1514.33
DMA	2016	0.73	67	10.33	56.67	1801.22	246.35	1554.87
DMA	2017	0.74	65.82	9.2	56.62	1771.65	227.57	1544.08
DMA	2018	0.74	64.64	8.58	56.06	1740.98	205.8	1535.18
DMA	2019	0.74	64.01	8.28	55.73	1726.72	200.91	1525.81
DMA	2020	0.74	65.16	7.94	57.22	1759.17	189.06	1570.11
DMA	2021	0.75	62.37	7.81	54.56	1692.45	191.01	1501.44
DNK	1990	0.8	65.65	6.55	59.1	1326.47	157.88	1168.59
DNK	1991	0.8	62.95	6.57	56.38	1267.42	157.74	1109.68
DNK	1992	0.81	61.56	6.57	55	1227.78	156.02	1071.77
DNK	1993	0.81	60.12	6.55	53.57	1190.95	155.7	1035.25
DNK	1994	0.82	56.18	6.25	49.93	1120.73	147.94	972.78
DNK	1995	0.82	54.2	6.12	48.08	1078.87	141.92	936.95
DNK	1996	0.82	51.33	6.11	45.21	1026.87	136.87	890.01
DNK	1997	0.83	48.39	5.87	42.51	969.93	131.48	838.46
DNK	1998	0.83	45.46	5.9	39.57	914.18	130.61	783.56
DNK	1999	0.84	44.26	5.42	38.84	890.82	119.39	771.42
DNK	2000	0.84	41.46	4.74	36.71	833.43	104.92	728.51
DNK	2001	0.84	40.29	4.13	36.16	803.35	94.39	708.96
DNK	2002	0.85	38.77	3.79	34.98	772.26	85.46	686.8
DNK	2003	0.85	36.46	3.54	32.92	730.25	82.14	648.1
DNK	2004	0.85	33.62	3.34	30.28	677.64	78.87	598.77
DNK	2005	0.86	31.24	3.16	28.08	630.72	73.7	557.02
DNK	2006	0.86	29.73	2.47	27.26	599.86	59.42	540.44
DNK	2007	0.86	28.58	2.44	26.14	578.13	59.85	518.28
DNK	2008	0.86	27.18	2.45	24.73	548.96	59.05	489.91
DNK	2009	0.86	26.08	2.33	23.75	524.89	59.4	465.49
DNK	2010	0.87	24.31	2.34	21.96	490.54	59.89	430.65
DNK	2011	0.87	22.05	2.45	19.6	449.14	59.2	389.93
DNK	2012	0.87	19.8	2.36	17.44	405.01	56.81	348.2
DNK	2013	0.87	17.72	2.31	15.41	365.19	54.91	310.28
DNK	2014	0.88	15.69	2.22	13.47	328.21	54.12	274.09
DNK	2015	0.88	14.51	2.24	12.27	305.07	54.03	251.04
DNK	2016	0.88	13.91	2.27	11.64	293.78	53.41	240.38
DNK	2017	0.88	13.41	2.25	11.16	284.01	53.72	230.29
DNK	2018	0.89	13.12	2.25	10.86	276.84	53.83	223.01
DNK	2019	0.89	12.3	2.24	10.06	260.08	54.74	205.34
DNK	2020	0.89	10.68	2.29	8.39	228.61	54.01	174.61
DNK	2021	0.9	11.54	2.28	9.26	245.15	54.66	190.49
DOM	1990	0.44	113.42	90.44	22.99	3367.06	2621.81	745.24
DOM	1991	0.45	103.19	88.88	14.31	3139.95	2557.52	582.43
DOM	1992	0.45	94.09	87.88	6.21	2904.26	2498.22	406.04
DOM	1993	0.45	87.72	87.15	0.57	2739.35	2468.25	271.09
DOM	1994	0.46	80.61	80.61	0	2547.02	2416.08	130.94
DOM	1995	0.46	76.77	76.77	0	2432.42	2338.7	93.72
DOM	1996	0.47	75.53	75.53	0	2357.06	2311.62	45.44
DOM	1997	0.47	74.04	74.04	0	2298.07	2260.22	37.85
DOM	1998	0.48	71.74	71.74	0	2219.74	2219.74	0
DOM	1999	0.49	70.19	70.19	0	2142.63	2126.75	15.88
DOM	2000	0.5	67.72	67.72	0	2067.96	1954.31	113.65
DOM	2001	0.5	65.52	65.52	0	2005.35	1909.43	95.93
DOM	2002	0.51	64.39	64.39	0	1947.48	1770.04	177.43
DOM	2003	0.52	66.63	62.59	4.04	1959.93	1666.82	293.12
DOM	2004	0.52	69.25	37.59	31.65	1996.72	1071.85	924.87
DOM	2005	0.53	68.83	28.91	39.92	1979.94	792.74	1187.2
DOM	2006	0.54	68.18	28.26	39.92	1966.05	739.94	1226.11
DOM	2007	0.55	66.03	27.94	38.08	1919.21	730.68	1188.52
DOM	2008	0.56	63	27.45	35.56	1814.72	719.82	1094.9
DOM	2009	0.56	60.5	25.69	34.81	1745.32	672.19	1073.13
DOM	2010	0.57	58.73	24.64	34.09	1708.31	648.32	1059.99
DOM	2011	0.57	57.74	24.03	33.71	1705.69	632.13	1073.57
DOM	2012	0.58	59.76	23.45	36.31	1769.92	619.37	1150.55
DOM	2013	0.58	62.31	23.28	39.03	1836.54	610.28	1226.26
DOM	2014	0.59	61.2	22.95	38.25	1851.37	604.13	1247.23
DOM	2015	0.59	60.91	22.57	38.35	1814.43	595.93	1218.5
DOM	2016	0.6	60.09	22.52	37.57	1790.7	595.35	1195.35
DOM	2017	0.6	58.76	22.12	36.64	1771.58	586.14	1185.44
DOM	2018	0.61	57.45	21.43	36.02	1729.07	574.54	1154.52
DOM	2019	0.61	55.45	20.53	34.92	1674.41	540.48	1133.93
DOM	2020	0.62	58.34	20.5	37.83	1718.56	537.95	1180.61
DOM	2021	0.62	54.77	19.37	35.4	1619.21	506.59	1112.62
DZA	1990	0.46	119.66	82.55	37.12	2706.06	2425.54	280.52
DZA	1991	0.47	115.46	78.77	36.69	2661.35	2327.25	334.11
DZA	1992	0.48	115.19	75.05	40.14	2651.08	2270.02	381.05
DZA	1993	0.48	115.34	73.34	42	2651.07	2190.07	461
DZA	1994	0.49	115.3	71.21	44.08	2650.7	2134.16	516.53
DZA	1995	0.5	116	68.76	47.24	2653.03	1957.46	695.57
DZA	1996	0.51	117.09	66.26	50.82	2666.55	1828.23	838.32
DZA	1997	0.51	118.9	63.03	55.87	2699.67	1666.03	1033.64
DZA	1998	0.52	119.57	37.86	81.71	2712.99	1174.67	1538.31
DZA	1999	0.53	122.03	31.39	90.64	2759.71	844.48	1915.24
DZA	2000	0.54	122.13	28.26	93.87	2750.66	758.08	1992.58
DZA	2001	0.55	120.38	27.94	92.43	2697.99	730.61	1967.38
DZA	2002	0.56	117.12	27.49	89.63	2613.8	720.78	1893.02
DZA	2003	0.56	115.44	25.68	89.76	2539.96	676.32	1863.64
DZA	2004	0.57	111.87	24.74	87.12	2446.75	648.67	1798.08
DZA	2005	0.58	108.47	24.22	84.25	2357.14	628.18	1728.96
DZA	2006	0.58	105.18	23.23	81.95	2270.51	609.85	1660.66
DZA	2007	0.59	101.39	22.91	78.48	2174.66	603.58	1571.08
DZA	2008	0.59	98.11	22.58	75.53	2090.97	596.37	1494.59
DZA	2009	0.6	95.14	22.6	72.54	2020.12	596.17	1423.95
DZA	2010	0.6	94.76	22.24	72.51	1985.9	585.3	1400.6
DZA	2011	0.61	94.58	21.62	72.96	1971.65	569.45	1402.2
DZA	2012	0.61	94.19	20.43	73.76	1965.3	538.77	1426.53
DZA	2013	0.62	94.6	20.47	74.13	1972.45	539.01	1433.44
DZA	2014	0.62	95.02	19.1	75.92	1981.04	506.76	1474.28
DZA	2015	0.63	94.3	17.92	76.38	1969.13	471.2	1497.93
DZA	2016	0.63	92.03	17.16	74.87	1923.68	443.23	1480.45
DZA	2017	0.64	89.77	16.64	73.13	1871.6	436.61	1434.99
DZA	2018	0.64	88.53	16.23	72.3	1834.94	428.2	1406.74
DZA	2019	0.65	87.44	15.92	71.52	1805.36	420.32	1385.04
DZA	2020	0.65	89.36	15.57	73.79	1837.11	412.43	1424.68
DZA	2021	0.66	84.38	15.09	69.29	1740.92	389.5	1351.42
ECU	1990	0.52	112.6	61.88	50.72	3018.73	1621.72	1397.01
ECU	1991	0.52	114.96	62.73	52.23	3036.5	1673.84	1362.67
ECU	1992	0.52	110.61	61.89	48.72	2911.57	1622.33	1289.24
ECU	1993	0.52	105.58	60.37	45.21	2794.41	1608.68	1185.73
ECU	1994	0.52	100.92	39.49	61.43	2734	1156.46	1577.54
ECU	1995	0.53	94.99	30.59	64.41	2639.78	856.3	1783.49
ECU	1996	0.53	92.07	29.32	62.75	2644.94	801.8	1843.14
ECU	1997	0.54	86.12	29.53	56.59	2478.94	777.07	1701.86
ECU	1998	0.54	86.05	28.83	57.22	2456.24	754.94	1701.3
ECU	1999	0.54	85.91	28.67	57.24	2445.62	762.49	1683.12
ECU	2000	0.54	83.8	28.45	55.35	2379.88	735.88	1644.01
ECU	2001	0.55	85.77	27.96	57.81	2403.48	730.91	1672.57
ECU	2002	0.55	88.69	27.45	61.24	2458	721	1736.99
ECU	2003	0.56	86.3	26.75	59.55	2400.99	701.77	1699.23
ECU	2004	0.57	86.61	25.71	60.9	2399.3	672.34	1726.97
ECU	2005	0.57	88.15	24.83	63.33	2387.49	649.33	1738.16
ECU	2006	0.57	83.93	24.07	59.86	2249.64	630.83	1618.81
ECU	2007	0.57	75.08	24.01	51.08	2010.03	628.87	1381.16
ECU	2008	0.58	64.69	23.44	41.25	1747.46	618.86	1128.6
ECU	2009	0.58	53.69	23.09	30.6	1476.72	611.05	865.67
ECU	2010	0.59	49.05	22.93	26.12	1347.13	603.11	744.02
ECU	2011	0.6	46.11	22.61	23.49	1246.35	596.41	649.94
ECU	2012	0.61	45.58	21.52	24.05	1209.08	571.33	637.75
ECU	2013	0.61	44.91	20.48	24.43	1173.26	539.22	634.03
ECU	2014	0.62	44.43	19.3	25.12	1149.59	499.02	650.57
ECU	2015	0.63	43.49	18.07	25.42	1104.92	470.51	634.41
ECU	2016	0.63	43.9	17.28	26.63	1101.21	447.7	653.51
ECU	2017	0.64	43.29	16.77	26.52	1079.2	438.72	640.48
ECU	2018	0.65	42.28	16.25	26.03	1050.5	428.26	622.24
ECU	2019	0.65	39.83	15.93	23.9	992.19	420.73	571.46
ECU	2020	0.66	34.04	15.61	18.43	858.54	412.17	446.36
ECU	2021	0.66	35.43	15.06	20.37	888.69	386.53	502.15
EGY	1990	0.42	316.48	93.53	222.95	8020.61	2862.86	5157.75
EGY	1991	0.43	310.82	91.61	219.21	7852.14	2711	5141.14
EGY	1992	0.44	299.32	90.28	209.04	7606.6	2612.12	4994.49
EGY	1993	0.45	301.77	87.71	214.06	7605.08	2499.54	5105.54
EGY	1994	0.46	304.72	82.34	222.38	7548.19	2419.9	5128.29
EGY	1995	0.47	297.33	79.04	218.28	7298.52	2333.92	4964.6
EGY	1996	0.48	289.24	75.02	214.22	7040.71	2265.01	4775.7
EGY	1997	0.48	286.35	72.87	213.48	6896.17	2191.59	4704.58
EGY	1998	0.49	284.04	70.87	213.17	6722.31	2134.22	4588.08
EGY	1999	0.5	276.9	68.68	208.22	6544.45	1950.83	4593.62
EGY	2000	0.5	261.89	68.86	193.03	6229.94	1919.5	4310.44
EGY	2001	0.51	274.1	66.06	208.03	6429.03	1818.87	4610.16
EGY	2002	0.52	283.2	62.77	220.43	6535.14	1667.58	4867.56
EGY	2003	0.52	291.58	59.97	231.61	6642.21	1605.53	5036.69
EGY	2004	0.53	288.15	37.59	250.56	6535.06	1075.07	5459.99
EGY	2005	0.53	283.47	30.26	253.21	6421.05	842.58	5578.47
EGY	2006	0.53	288.61	33.69	254.92	6484.98	932.35	5552.63
EGY	2007	0.53	292.35	32.47	259.88	6497.65	891.66	5605.99
EGY	2008	0.52	302.54	36.77	265.77	6636.88	1074.1	5562.78
EGY	2009	0.52	311.71	62.58	249.12	6802.79	1654.1	5148.69
EGY	2010	0.51	314.17	66.12	248.05	6806.15	1820.58	4985.57
EGY	2011	0.5	308.85	66.18	242.67	6655.39	1823.03	4832.36
EGY	2012	0.51	309.26	65.53	243.73	6615.55	1772.97	4842.59
EGY	2013	0.52	301.17	62.02	239.14	6380.77	1619.41	4761.36
EGY	2014	0.53	303.07	29.42	273.65	6302.27	774.12	5528.15
EGY	2015	0.54	303.22	28.29	274.93	6309.08	736.03	5573.05
EGY	2016	0.56	286.44	26.72	259.72	5960.22	703.95	5256.27
EGY	2017	0.57	271.82	24.69	247.13	5662.21	650.82	5011.39
EGY	2018	0.58	268.13	23.46	244.68	5622.16	622.47	4999.69
EGY	2019	0.59	261.47	22.91	238.56	5521.13	604.38	4916.75
EGY	2020	0.6	236.9	22.59	214.31	4996.46	596.08	4400.37
EGY	2021	0.61	251.77	21.52	230.25	5287.62	572.62	4715
ERI	1990	0.22	311.97	197.41	114.57	10054.8	6087.8	3966.97
ERI	1991	0.22	308.9	197.25	111.65	9947.73	6057.87	3889.86
ERI	1992	0.23	301.85	196.61	105.24	9746.34	6085.5	3660.84
ERI	1993	0.24	294.16	192.24	101.92	9387.71	6070.75	3316.96
ERI	1994	0.25	290.04	185.53	104.5	9072.71	6075.9	2996.81
ERI	1995	0.26	290.83	179.02	111.81	8983.96	6022.12	2961.84
ERI	1996	0.27	284.87	173.42	111.45	8723.61	5897.23	2826.37
ERI	1997	0.28	278.8	144.6	134.21	8484.71	4313.35	4171.36
ERI	1998	0.29	272.99	139.53	133.46	8266.22	4118.79	4147.43
ERI	1999	0.3	267.88	138.27	129.62	8070.16	4073.79	3996.37
ERI	2000	0.31	263.94	138.36	125.59	7933.28	4080.59	3852.7
ERI	2001	0.32	258.57	137.67	120.9	7742.72	4053.47	3689.25
ERI	2002	0.32	255.02	137.58	117.44	7611.33	4052.74	3558.58
ERI	2003	0.33	251.86	137.51	114.35	7476.82	4051.11	3425.71
ERI	2004	0.33	250.1	137.57	112.52	7424.41	4051.81	3372.6
ERI	2005	0.34	247.83	137.57	110.26	7342.88	4050.36	3292.53
ERI	2006	0.34	246.26	137.54	108.72	7281.68	4049.67	3232.01
ERI	2007	0.34	245.33	137.53	107.8	7222.2	4050.92	3171.29
ERI	2008	0.34	246.44	137.66	108.78	7226.88	4050.01	3176.86
ERI	2009	0.35	246.52	137.63	108.89	7174	4049.88	3124.12
ERI	2010	0.35	245.87	119.29	126.58	7119.29	3725.09	3394.2
ERI	2011	0.35	242.74	113.91	128.83	6980.65	3627.84	3352.81
ERI	2012	0.36	239.81	108.83	130.98	6844.61	3521.9	3322.71
ERI	2013	0.36	237.85	107.42	130.43	6764.19	3456.21	3307.98
ERI	2014	0.37	233.3	104.48	128.82	6597.59	3407.95	3189.63
ERI	2015	0.38	231.79	103.67	128.12	6518.86	3316.82	3202.04
ERI	2016	0.38	228.84	103.49	125.35	6408.02	3306.85	3101.17
ERI	2017	0.39	226.61	103.2	123.4	6300.4	3274.55	3025.85
ERI	2018	0.39	223.28	103.02	120.25	6163.06	3277.66	2885.4
ERI	2019	0.4	219.78	100.28	119.5	6024.69	3132.35	2892.35
ERI	2020	0.4	209.69	96.76	112.93	5703.35	2999.91	2703.43
ERI	2021	0.4	212.33	96.64	115.69	5753.23	2994.49	2758.74
ESP	1990	0.64	42.53	16.61	25.92	889.61	439.19	450.42
ESP	1991	0.64	40.25	16.29	23.96	845.52	428.53	416.99
ESP	1992	0.65	37.66	15.93	21.73	800.4	419.78	380.62
ESP	1993	0.66	36.05	15.61	20.43	767.65	413.32	354.33
ESP	1994	0.67	34.4	14.33	20.07	732.29	368.13	364.16
ESP	1995	0.67	33.65	13.52	20.13	717.52	348.9	368.61
ESP	1996	0.68	33.1	13.31	19.79	709.41	337.48	371.93
ESP	1997	0.68	32.44	13.15	19.29	694.59	335.21	359.39
ESP	1998	0.69	32.84	13.1	19.74	699.65	334.85	364.79
ESP	1999	0.69	33.16	13.08	20.08	705.98	335.34	370.64
ESP	2000	0.7	31.2	13.1	18.11	676.65	335.48	341.17
ESP	2001	0.7	29.46	13.1	16.36	645.7	335.15	310.55
ESP	2002	0.71	28.53	13.11	15.43	626.39	334.82	291.57
ESP	2003	0.71	27.58	13.1	14.48	603.97	334.81	269.16
ESP	2004	0.71	25.6	13.1	12.5	566.31	334.44	231.87
ESP	2005	0.72	24.46	13.11	11.35	541.01	334.36	206.65
ESP	2006	0.72	22.34	13.08	9.26	502.48	325.59	176.9
ESP	2007	0.73	21.01	13.09	7.92	475.76	314.89	160.86
ESP	2008	0.73	19.5	11.65	7.85	444.81	278.97	165.84
ESP	2009	0.73	17.82	10.43	7.39	411.96	248.19	163.77
ESP	2010	0.74	16.3	8.61	7.69	381.66	206.81	174.85
ESP	2011	0.74	15.41	8.34	7.07	363.94	202.33	161.61
ESP	2012	0.75	14.79	7.92	6.86	351.1	191.2	159.9
ESP	2013	0.75	13.72	7.75	5.96	331.94	190.56	141.38
ESP	2014	0.75	13.12	7.76	5.36	320.84	189.25	131.59
ESP	2015	0.75	12.86	7.62	5.24	311.57	191.03	120.54
ESP	2016	0.75	11.67	7.66	4.01	287.98	189.7	98.28
ESP	2017	0.76	10.57	7.56	3.01	262.01	191.38	70.63
ESP	2018	0.76	9.55	7.52	2.03	238.89	188.98	49.91
ESP	2019	0.76	8.87	7.13	1.74	224.99	190.86	34.14
ESP	2020	0.77	8.9	7.1	1.8	222.81	191.17	31.64
ESP	2021	0.77	8.17	7.04	1.13	213.19	190.69	22.5
EST	1990	0.67	97.36	13.56	83.8	1983.32	348.58	1634.73
EST	1991	0.69	99.27	13.1	86.17	2024.12	336.05	1688.07
EST	1992	0.7	97.65	13.11	84.54	2008.87	334.88	1673.99
EST	1993	0.7	101.87	13.11	88.77	2118.65	335.42	1783.23
EST	1994	0.71	105.36	13.09	92.28	2221.13	335.52	1885.6
EST	1995	0.71	97.71	13.09	84.62	2074.56	335.01	1739.54
EST	1996	0.72	85.34	13.08	72.26	1775.57	334.26	1441.3
EST	1997	0.72	80.98	13.09	67.89	1677.16	314.53	1362.62
EST	1998	0.73	80.42	11.71	68.72	1659.5	280.15	1379.35
EST	1999	0.73	72.43	10.42	62.01	1487.31	250.17	1237.14
EST	2000	0.74	67.15	8.58	58.57	1380.05	205.12	1174.92
EST	2001	0.75	63.78	7.8	55.97	1311.24	189.69	1121.55
EST	2002	0.75	56.21	7.66	48.55	1155.26	192.3	962.97
EST	2003	0.76	49.54	7.54	42.01	1009.54	190.58	818.97
EST	2004	0.76	42.94	7.17	35.78	877.7	190	687.7
EST	2005	0.77	38.25	7.04	31.22	776.63	191.58	585.05
EST	2006	0.77	35.29	6.89	28.4	714.23	192.28	521.95
EST	2007	0.78	32.56	6.84	25.72	664.93	188.46	476.47
EST	2008	0.79	28.3	6.82	21.48	578.85	173.35	405.5
EST	2009	0.79	25.08	6.59	18.49	516.48	158.43	358.04
EST	2010	0.8	21.95	6.58	15.37	454.48	157.79	296.69
EST	2011	0.81	19.68	6.57	13.11	411.73	157.81	253.92
EST	2012	0.81	16.99	6.55	10.44	361.49	155.55	205.95
EST	2013	0.81	13.99	6.27	7.73	300.51	148.37	152.15
EST	2014	0.82	12.02	6.2	5.82	263.29	141.4	121.89
EST	2015	0.82	10.4	6.11	4.29	229.35	136.78	92.56
EST	2016	0.83	10.07	5.99	4.08	221.89	134.2	87.69
EST	2017	0.83	8.97	5.86	3.1	201.34	131.05	70.29
EST	2018	0.83	8.51	5.41	3.1	193.91	119.03	74.88
EST	2019	0.84	7.57	4.82	2.75	173.71	104.85	68.86
EST	2020	0.84	5.72	4.08	1.64	133.41	92.48	40.93
EST	2021	0.84	7.26	3.83	3.43	166.3	86.33	79.98
ETH	1990	0.15	307.88	208.74	99.14	11536.5	6823.38	4713.13
ETH	1991	0.15	304.43	208.57	95.86	11375.3	6823.74	4551.6
ETH	1992	0.15	301.04	208.56	92.48	11233.2	6817.71	4415.48
ETH	1993	0.15	297.03	208.74	88.29	11057.9	6816.43	4241.44
ETH	1994	0.15	293.17	208.55	84.61	10869.6	6725.54	4144.03
ETH	1995	0.16	289.95	208.54	81.41	10657.8	6737.21	3920.61
ETH	1996	0.16	283.55	207.08	76.47	10350.7	6578.66	3772.04
ETH	1997	0.16	277.41	205.44	71.97	10070.7	6483.07	3587.61
ETH	1998	0.17	270.5	201.74	68.76	9787.9	6277.38	3510.52
ETH	1999	0.17	263.26	197.49	65.77	9495.59	6077.32	3418.27
ETH	2000	0.17	255.21	198.01	57.2	9175.69	6093.8	3081.88
ETH	2001	0.18	245.5	197.74	47.76	8807.8	6085.92	2721.87
ETH	2002	0.18	235.21	197.86	37.35	8422.76	6125.27	2297.49
ETH	2003	0.19	226.56	197.21	29.35	8055.69	6085.78	1969.91
ETH	2004	0.2	219.04	198.27	20.76	7719.96	6099.59	1620.37
ETH	2005	0.2	212	197.83	14.18	7451.83	6067.94	1383.89
ETH	2006	0.21	204.48	197.68	6.8	7145.27	6127.04	1018.23
ETH	2007	0.22	196.55	196.12	0.43	6863.23	6070.31	792.92
ETH	2008	0.23	189.1	189.1	0	6584.88	6110.71	474.18
ETH	2009	0.24	181.81	181.81	0	6293.79	6046.19	247.6
ETH	2010	0.26	175.37	175.37	0	6018.63	5980.48	38.15
ETH	2011	0.27	169.61	169.61	0	5806.69	5806.69	0
ETH	2012	0.28	163.63	150.76	12.88	5588.08	4591.72	996.37
ETH	2013	0.29	158.51	139.99	18.52	5389.17	4182.5	1206.67
ETH	2014	0.3	154.83	138.98	15.85	5259.13	4074.46	1184.67
ETH	2015	0.31	151.48	137.71	13.77	5103.58	4053.07	1050.51
ETH	2016	0.32	148.64	137.54	11.1	4968.35	4051.18	917.16
ETH	2017	0.33	147.09	137.56	9.53	4877.84	4051.1	826.74
ETH	2018	0.34	145.2	137.66	7.54	4769.74	4052.16	717.58
ETH	2019	0.35	143.66	116.68	26.98	4668.85	3693.14	975.71
ETH	2020	0.35	139.62	112.25	27.37	4487.38	3658.8	828.58
ETH	2021	0.36	139.8	108.91	30.89	4466.33	3506.19	960.14
FIN	1990	0.76	25.95	7.65	18.3	547.04	191.44	355.59
FIN	1991	0.76	24.67	7.54	17.13	519.54	190.64	328.91
FIN	1992	0.76	23.98	7.54	16.44	498.94	188.16	310.78
FIN	1993	0.76	23.09	7.13	15.96	474.46	189.61	284.85
FIN	1994	0.77	21.3	7.09	14.22	440.33	191.15	249.18
FIN	1995	0.77	20.4	7.04	13.36	421.56	189.82	231.74
FIN	1996	0.77	19.13	6.86	12.27	395.74	189.42	206.33
FIN	1997	0.78	18.07	6.81	11.26	374.31	189.87	184.44
FIN	1998	0.78	17.03	6.84	10.19	353.18	187.93	165.24
FIN	1999	0.79	16.26	6.8	9.46	334.82	183.71	151.11
FIN	2000	0.79	15.42	6.81	8.61	316.86	166.25	150.61
FIN	2001	0.79	14.44	6.57	7.88	295.46	159.59	135.87
FIN	2002	0.8	13.85	6.6	7.25	282.33	158.03	124.31
FIN	2003	0.8	12.96	6.59	6.37	267.14	157.9	109.24
FIN	2004	0.81	11.92	6.59	5.33	250.79	157.86	92.93
FIN	2005	0.81	10.9	6.56	4.34	232.6	156	76.61
FIN	2006	0.81	10.19	6.55	3.64	217.82	148.91	68.91
FIN	2007	0.82	9.72	6.21	3.51	208.52	147.31	61.2
FIN	2008	0.82	9.1	6.14	2.96	196.15	142.28	53.87
FIN	2009	0.82	8.58	6.11	2.47	184.67	136.88	47.79
FIN	2010	0.82	7.98	6.1	1.87	172.12	136.15	35.98
FIN	2011	0.83	7.11	5.88	1.23	154.87	130.38	24.49
FIN	2012	0.83	6.16	5.89	0.28	134.69	130.78	3.9
FIN	2013	0.83	5.15	5.15	0	113.39	113.39	0
FIN	2014	0.84	4.34	4.34	0	97.05	97.05	0
FIN	2015	0.84	3.84	3.84	0	86.94	86.94	0
FIN	2016	0.84	3.63	3.63	0	83.48	83.48	0
FIN	2017	0.85	3.46	3.46	0	80.44	80.44	0
FIN	2018	0.85	3.28	3.28	0	77.23	77.23	0
FIN	2019	0.86	3.04	3.04	0	72.13	72.13	0
FIN	2020	0.86	2.15	2.15	0	52.67	52.67	0
FIN	2021	0.86	2.88	2.4	0.49	69.37	58.23	11.13
FJI	1990	0.53	231.27	28.86	202.41	5966.24	821.71	5144.53
FJI	1991	0.54	227.94	28.74	199.19	5823.89	745.89	5078
FJI	1992	0.54	224.69	28.41	196.28	5671.08	736.17	4934.91
FJI	1993	0.55	223.11	27.95	195.16	5616	730.41	4885.59
FJI	1994	0.55	221.61	27.49	194.12	5558.78	720.53	4838.25
FJI	1995	0.56	223.69	26.66	197.03	5555.07	699.49	4855.58
FJI	1996	0.57	226.9	25.76	201.13	5603.74	674.51	4929.23
FJI	1997	0.57	225.79	24.78	201.01	5577.05	653.06	4923.99
FJI	1998	0.58	220.68	23.57	197.12	5409.9	620.01	4789.89
FJI	1999	0.58	229.56	23.17	206.39	5612.92	610.65	5002.27
FJI	2000	0.59	233.12	22.94	210.18	5675.13	605.08	5070.05
FJI	2001	0.59	223.64	22.56	201.09	5439.18	594.8	4844.39
FJI	2002	0.6	215.47	22.18	193.29	5228.7	587.08	4641.62
FJI	2003	0.6	214.9	22.27	192.63	5191.48	585.06	4606.42
FJI	2004	0.61	200.02	21.53	178.49	4901.26	569.5	4331.75
FJI	2005	0.61	193.38	21.45	171.93	4811.95	572.52	4239.44
FJI	2006	0.61	189.15	20.53	168.62	4743.8	535	4208.8
FJI	2007	0.62	184.26	20.63	163.63	4663.26	541.68	4121.58
FJI	2008	0.62	181.14	19.39	161.74	4618.67	505.35	4113.33
FJI	2009	0.62	176.58	19.21	157.37	4495.57	502.95	3992.63
FJI	2010	0.62	175.16	19.22	155.94	4421.52	502.57	3918.94
FJI	2011	0.63	171.91	17.97	153.94	4306.66	467.52	3839.15
FJI	2012	0.63	165.42	17.94	147.48	4153.24	471.96	3681.28
FJI	2013	0.63	159.66	17.04	142.62	4009.9	446.8	3563.1
FJI	2014	0.64	154.51	16.53	137.98	3871.75	436.63	3435.12
FJI	2015	0.65	149.76	16.22	133.55	3754.95	428.56	3326.39
FJI	2016	0.65	145.43	15.98	129.45	3650.77	420.18	3230.6
FJI	2017	0.66	141.64	15.55	126.09	3556.02	411.23	3144.79
FJI	2018	0.66	137.41	15.07	122.34	3453.63	389.67	3063.95
FJI	2019	0.67	132.85	14.41	118.45	3344.91	371.76	2973.15
FJI	2020	0.67	125.14	13.51	111.63	3146.02	348.53	2797.49
FJI	2021	0.68	128.92	13.53	115.39	3247.26	347.98	2899.28
FRA	1990	0.73	35.97	11.03	24.94	716.73	271.23	445.51
FRA	1991	0.74	34.66	9.12	25.54	696.42	227.77	468.64
FRA	1992	0.74	33.41	8.31	25.1	672.87	201.82	471.05
FRA	1993	0.75	32.64	7.79	24.85	656.96	191.18	465.78
FRA	1994	0.75	31.29	7.64	23.65	632	190.67	441.33
FRA	1995	0.76	30.88	7.53	23.35	621.73	191.92	429.81
FRA	1996	0.76	30.38	7.55	22.82	611.62	188.44	423.18
FRA	1997	0.76	29.26	7.16	22.1	591.81	189.22	402.58
FRA	1998	0.77	28.55	7.08	21.47	582.13	190.19	391.94
FRA	1999	0.77	27.59	7.02	20.56	565.72	191.48	374.24
FRA	2000	0.77	26.26	6.86	19.4	544.46	191.19	353.27
FRA	2001	0.78	25.15	6.84	18.31	527.02	188.59	338.43
FRA	2002	0.78	24.39	6.86	17.53	510.49	188.71	321.78
FRA	2003	0.78	23.49	6.82	16.66	493.72	188.49	305.23
FRA	2004	0.79	21.49	6.8	14.69	459.65	184.79	274.87
FRA	2005	0.79	20.62	6.81	13.81	442.81	174.79	268.02
FRA	2006	0.79	19.45	6.61	12.85	423.29	160.63	262.66
FRA	2007	0.8	18.62	6.6	12.02	407.85	158.98	248.87
FRA	2008	0.8	17.97	6.62	11.36	395.22	159.58	235.64
FRA	2009	0.8	17.27	6.56	10.71	381.89	157.88	224
FRA	2010	0.8	16.22	6.56	9.66	362.25	157.66	204.59
FRA	2011	0.81	15.26	6.56	8.7	343.1	157.79	185.31
FRA	2012	0.81	14.4	6.54	7.86	324.32	155.47	168.85
FRA	2013	0.81	13.14	6.27	6.88	300.33	149.44	150.89
FRA	2014	0.82	11.9	6.23	5.68	275.99	141.75	134.24
FRA	2015	0.82	11.36	6.15	5.21	263.71	140.44	123.28
FRA	2016	0.82	10.48	6.11	4.38	243.99	137	106.99
FRA	2017	0.83	9.76	5.99	3.77	229.8	134.18	95.61
FRA	2018	0.83	9.01	5.88	3.14	214.99	130.46	84.53
FRA	2019	0.83	8.39	5.87	2.52	201.55	130.38	71.17
FRA	2020	0.84	7.81	5.41	2.4	188.15	118.5	69.65
FRA	2021	0.84	7.67	4.84	2.82	187.05	104.99	82.06
FSM	1990	0.46	335.14	82.24	252.9	8809.91	2417.52	6392.4
FSM	1991	0.47	329.53	78.05	251.48	8652.99	2333.04	6319.95
FSM	1992	0.47	323.61	76.45	247.15	8484.61	2273.06	6211.55
FSM	1993	0.48	317.52	75.48	242.04	8311.06	2238.67	6072.39
FSM	1994	0.49	312.09	73.03	239.06	8162.95	2190.63	5972.32
FSM	1995	0.49	305.47	70.76	234.71	7969.94	2055.45	5914.5
FSM	1996	0.5	299.63	68.85	230.78	7807.99	1958.18	5849.8
FSM	1997	0.5	294.03	69.06	224.98	7645.49	1949.09	5696.4
FSM	1998	0.5	288.45	67.17	221.28	7484.23	1912.86	5571.37
FSM	1999	0.51	282.94	66.16	216.77	7324.13	1830.07	5494.07
FSM	2000	0.51	277.45	64.8	212.65	7176.63	1760.34	5416.29
FSM	2001	0.52	270.86	62.99	207.86	6976.86	1655.35	5321.51
FSM	2002	0.52	263.78	62.14	201.64	6778.46	1624.2	5154.26
[truncated: 4,532 more rows]
